# Supplementary material for: Glial responses during epileptogenesis in Mus musculus point to potential therapeutic targets
Source: PubMed Central journal article supplement (PMC6095496; doi:10.1371/journal.pone.0201742), 2018-08-16
Supplement: pone.0201742.s005.pdf [file pone.0201742.s005.pdf]

**Table S1:** Significant gene expression changes detected by microarrays following SAM analysis at 6 hours post-injection (thresholds:  $\geq 2$  fold and 0% median FDR).

| Probe Set ID | Gene Symbol   | Gene Title                                                  | Fold Change |
|--------------|---------------|-------------------------------------------------------------|-------------|
| 1459372_at   | Npas4         | neuronal PAS domain protein 4                               | 69.30       |
| 1443475_at   | Hist1h3i      | Histone cluster 1, H3i                                      | 24.81       |
| 1422134_at   | Fosb          | FBJ osteosarcoma oncogene B                                 | 16.46       |
| 1423100_at   | Fos           | FBJ osteosarcoma oncogene                                   | 12.20       |
| 1453851_a_at | Gadd45g       | growth arrest and DNA-damage-inducible 45 gamma             | 11.88       |
| 1438133_a_at | Cyr61         | cysteine rich protein 61                                    | 11.50       |
| 1418687_at   | Arc           | activity regulated cytoskeletal-associated protein          | 11.46       |
| 1417262_at   | Ptgs2         | prostaglandin-endoperoxide synthase 2                       | 10.77       |
| 1421396_at   | Pcsk1         | proprotein convertase subtilisin/kexin type 1               | 10.43       |
| 1424248_at   | Arpp21        | cyclic AMP-regulated phosphoprotein, 21                     | 9.55        |
| 1417263_at   | Ptgs2         | prostaglandin-endoperoxide synthase 2                       | 8.99        |
| 1436387_at   | C330006P03Rik | RIKEN cDNA C330006P03 gene                                  | 7.52        |
| 1448830_at   | Dusp1         | dual specificity phosphatase 1                              | 7.42        |
| 1416505_at   | Nr4a1         | nuclear receptor subfamily 4, group A, member 1             | 7.30        |
| 1457823_at   | Cyr61         | cysteine rich protein 61                                    | 7.26        |
| 1415899_at   | Junb          | Jun-B oncogene                                              | 6.60        |
| 1422562_at   | Rrad          | Ras-related associated with diabetes                        | 6.45        |
| 1453287_at   | 5730557B15Rik | RIKEN cDNA 5730557B15 gene                                  | 6.30        |
| 1422168_a_at | Bdnf          | brain derived neurotrophic factor                           | 6.10        |
| 1452160_at   | Tiparp        | TCDD-inducible poly(ADP-ribose) polymerase                  | 5.99        |
| 1440179_x_at | Rnf217        | ring finger protein 217                                     | 5.99        |
| 1428759_s_at | Ccdc49        | coiled-coil domain containing 49                            | 5.94        |
| 1435872_at   | ---           | Transcribed locus                                           | 5.83        |
| 1450971_at   | Gadd45b       | growth arrest and DNA-damage-inducible 45 beta              | 5.68        |
| 1442014_at   | ---           | Transcribed locus                                           | 5.60        |
| 1437166_at   | Tinf2         | Terf1 (TRF1)-interacting nuclear factor 2                   | 5.49        |
| 1452161_at   | Tiparp        | TCDD-inducible poly(ADP-ribose) polymerase                  | 5.43        |
| 1449773_s_at | Gadd45b       | growth arrest and DNA-damage-inducible 45 beta              | 5.35        |
| 1455034_at   | ---           | ---                                                         | 5.33        |
| 1417409_at   | Jun           | Jun oncogene                                                | 5.23        |
| 1434350_at   | Axud1         | AXIN1 up-regulated 1                                        | 5.11        |
| 1418322_at   | Crem          | cAMP responsive element modulator                           | 5.06        |
| 1451386_at   | Blvrb         | biliverdin reductase B (flavin reductase (NADPH))           | 4.93        |
| 1437199_at   | ---           | ---                                                         | 4.89        |
| 1419247_at   | Rgs2          | regulator of G-protein signaling 2                          | 4.89        |
| 1421679_a_at | Cdkn1a        | cyclin-dependent kinase inhibitor 1A (P21)                  | 4.83        |
| 1415855_at   | Kitl          | kit ligand                                                  | 4.77        |
| 1441300_at   | Kcnf1         | potassium voltage-gated channel, subfamily F, member 1      | 4.73        |
| 1439830_at   | LOC675366     | similar to mitogen activated protein kinase kinase kinase 5 | 4.51        |
| 1422452_at   | Bag3          | Bcl2-associated athanogene 3                                | 4.40        |
| 1451680_at   | Srxn1         | sulfiredoxin 1 homolog (S. cerevisiae)                      | 4.35        |

|              |                         |                                                                                                                        |      |
|--------------|-------------------------|------------------------------------------------------------------------------------------------------------------------|------|
| 1424638_at   | Cdkn1a                  | cyclin-dependent kinase inhibitor 1A (P21)                                                                             | 4.22 |
| 1438796_at   | Nr4a3                   | nuclear receptor subfamily 4, group A, member 3                                                                        | 3.93 |
| 1451264_at   | Frmd6                   | FERM domain containing 6                                                                                               | 3.88 |
| 1448117_at   | Kitl                    | kit ligand                                                                                                             | 3.86 |
| 1426721_s_at | Tiparp                  | TCDD-inducible poly(ADP-ribose) polymerase                                                                             | 3.86 |
| 1449977_at   | Egr4                    | early growth response 4                                                                                                | 3.85 |
| 1421340_at   | LOC675366 ///<br>Map3k5 | mitogen activated protein kinase kinase kinase 5<br>/// similar to mitogen activated protein kinase<br>kinase kinase 5 | 3.81 |
| 1416892_s_at | 3110001A13Rik           | RIKEN cDNA 3110001A13 gene                                                                                             | 3.80 |
| 1455085_at   | 1700086L19Rik           | RIKEN cDNA 1700086L19 gene                                                                                             | 3.79 |
| 1418603_at   | Avpr1a                  | arginine vasopressin receptor 1A                                                                                       | 3.73 |
| 1450716_at   | Adamts1                 | a disintegrin-like and metallopeptidase (reprolysin<br>type) with thrombospondin type 1 motif, 1                       | 3.65 |
| 1419248_at   | Rgs2                    | regulator of G-protein signaling 2                                                                                     | 3.64 |
| 1421267_a_at | Cited2                  | Cbp/p300-interacting transactivator, with Glu/Asp-<br>rich carboxy-terminal domain, 2                                  | 3.63 |
| 1433599_at   | Baz1a                   | bromodomain adjacent to zinc finger domain 1A                                                                          | 3.62 |
| 1416529_at   | Emp1                    | epithelial membrane protein 1                                                                                          | 3.60 |
| 1426875_s_at | Srxn1                   | sulfiredoxin 1 homolog (S. cerevisiae)                                                                                 | 3.53 |
| 1437696_at   | BC049807                | cDNA sequence BC049807                                                                                                 | 3.53 |
| 1456783_at   | Zdbf2                   | zinc finger, DBF-type containing 2                                                                                     | 3.50 |
| 1429787_x_at | Zwint                   | ZW10 interactor                                                                                                        | 3.49 |
| 1416067_at   | Ifrd1                   | interferon-related developmental regulator 1                                                                           | 3.49 |
| 1456610_at   | Jmjd3                   | jumonji domain containing 3                                                                                            | 3.48 |
| 1419209_at   | Cxcl1                   | chemokine (C-X-C motif) ligand 1                                                                                       | 3.44 |
| 1453059_at   | 2310046A06Rik           | RIKEN cDNA 2310046A06 gene                                                                                             | 3.42 |
| 1423389_at   | Smad7                   | MAD homolog 7 (Drosophila)                                                                                             | 3.41 |
| 1421756_a_at | Gpr19                   | G protein-coupled receptor 19                                                                                          | 3.40 |
| 1416129_at   | Errfi1                  | ERBB receptor feedback inhibitor 1                                                                                     | 3.39 |
| 1417719_at   | Sap30                   | sin3 associated polypeptide                                                                                            | 3.39 |
| 1459056_at   | Rasgrf1                 | RAS protein-specific guanine nucleotide-releasing<br>factor 1                                                          | 3.34 |
| 1447452_at   | Reep3                   | Receptor accessory protein 3                                                                                           | 3.33 |
| 1419816_s_at | Errfi1                  | ERBB receptor feedback inhibitor 1                                                                                     | 3.26 |
| 1425162_at   | Rorb                    | RAR-related orphan receptor beta                                                                                       | 3.18 |
| 1442590_at   | Tnfrsf23                | tumor necrosis factor receptor superfamily,<br>member 23                                                               | 3.16 |
| 1450708_at   | Scg2                    | secretogranin II                                                                                                       | 3.14 |
| 1449699_s_at | C330027C09Rik           | RIKEN cDNA C330027C09 gene                                                                                             | 3.11 |
| 1423903_at   | Pvr                     | poliovirus receptor                                                                                                    | 3.11 |
| 1452519_a_at | Zfp36                   | zinc finger protein 36                                                                                                 | 3.09 |
| 1452207_at   | Cited2                  | Cbp/p300-interacting transactivator, with Glu/Asp-<br>rich carboxy-terminal domain, 2                                  | 3.07 |
| 1415844_at   | Syt4                    | synaptotagmin IV                                                                                                       | 3.07 |
| 1440657_at   | ---                     | ---                                                                                                                    | 3.06 |
| 1444402_at   | Zc3h12c                 | zinc finger CCCH type containing 12C                                                                                   | 3.01 |
| 1419091_a_at | Anxa2                   | annexin A2                                                                                                             | 2.98 |
| 1417426_at   | Srgn                    | serglycin                                                                                                              | 2.97 |
| 1448170_at   | Siah2                   | seven in absentia 2                                                                                                    | 2.94 |
| 1426208_x_at | Plagl1                  | pleiomorphic adenoma gene-like 1                                                                                       | 2.94 |
| 1436659_at   | Dclk1                   | doublecortin-like kinase 1                                                                                             | 2.93 |
| 1448303_at   | Gpnmb                   | glycoprotein (transmembrane) nmb                                                                                       | 2.83 |

|              |                                                                                                                   |                                                                                                                                                                                   |      |
|--------------|-------------------------------------------------------------------------------------------------------------------|-----------------------------------------------------------------------------------------------------------------------------------------------------------------------------------|------|
| 1427893_a_at | Pmvk                                                                                                              | phosphomevalonate kinase                                                                                                                                                          | 2.82 |
| 1433582_at   | 1190002N15Rik ///<br>LOC100044725                                                                                 | RIKEN cDNA 1190002N15 gene /// hypothetical<br>protein LOC100044725                                                                                                               | 2.81 |
| 1418349_at   | Hbegf                                                                                                             | heparin-binding EGF-like growth factor                                                                                                                                            | 2.81 |
| 1451289_at   | Dclk1                                                                                                             | doublecortin-like kinase 1                                                                                                                                                        | 2.79 |
| 1455372_at   | Cpeb3                                                                                                             | cytoplasmic polyadenylation element binding<br>protein 3                                                                                                                          | 2.79 |
| 1430089_at   | 5830469G19Rik                                                                                                     | RIKEN cDNA 5830469G19 gene                                                                                                                                                        | 2.73 |
| 1435595_at   | 1810011O10Rik                                                                                                     | RIKEN cDNA 1810011O10 gene                                                                                                                                                        | 2.72 |
| 1450744_at   | Ell2                                                                                                              | elongation factor RNA polymerase II 2                                                                                                                                             | 2.70 |
| 1433675_at   | Snhg1                                                                                                             | small nucleolar RNA host gene (non-protein<br>coding) 1                                                                                                                           | 2.69 |
| 1422609_at   | Arpp19                                                                                                            | cAMP-regulated phosphoprotein 19                                                                                                                                                  | 2.68 |
| 1451612_at   | Mt1                                                                                                               | metallothionein 1                                                                                                                                                                 | 2.66 |
| 1420098_s_at | D13ErtD787e                                                                                                       | DNA segment, Chr 13, ERATO Doi 787,<br>expressed                                                                                                                                  | 2.65 |
| 1423312_at   | Tpbg                                                                                                              | trophoblast glycoprotein                                                                                                                                                          | 2.59 |
| 1420558_at   | Selp                                                                                                              | selectin, platelet                                                                                                                                                                | 2.58 |
| 1424271_at   | Dclk1                                                                                                             | doublecortin-like kinase 1                                                                                                                                                        | 2.53 |
| 1446906_at   | C81615                                                                                                            | expressed sequence C81615                                                                                                                                                         | 2.52 |
| 1450479_x_at | Ptpn12                                                                                                            | protein tyrosine phosphatase, non-receptor type<br>12                                                                                                                             | 2.46 |
| 1417483_at   | Nfkbiz                                                                                                            | nuclear factor of kappa light polypeptide gene<br>enhancer in B-cells inhibitor, zeta                                                                                             | 2.45 |
| 1455166_at   | Arl5b                                                                                                             | ADP-ribosylation factor-like 5B                                                                                                                                                   | 2.41 |
| 1434646_s_at | LOC100041953 ///<br>LOC100047209 ///<br>Sap18                                                                     | Sin3-associated polypeptide 18 /// similar to<br>SAP18                                                                                                                            | 2.41 |
| 1433883_at   | Tpm4                                                                                                              | tropomyosin 4                                                                                                                                                                     | 2.40 |
| 1441274_at   | ---                                                                                                               | ---                                                                                                                                                                               | 2.40 |
| 1417273_at   | Pdk4                                                                                                              | pyruvate dehydrogenase kinase, isoenzyme 4                                                                                                                                        | 2.38 |
| 1430535_at   | Tsc22d2                                                                                                           | TSC22 domain family 2                                                                                                                                                             | 2.35 |
| 1449851_at   | Per1                                                                                                              | period homolog 1 (Drosophila)                                                                                                                                                     | 2.32 |
| 1415802_at   | Slc16a1                                                                                                           | solute carrier family 16 (monocarboxylic acid<br>transporters), member 1                                                                                                          | 2.27 |
| 1416600_a_at | Rcan1                                                                                                             | regulator of calcineurin 1                                                                                                                                                        | 2.27 |
| 1456048_at   | Cpeb3                                                                                                             | cytoplasmic polyadenylation element binding<br>protein 3                                                                                                                          | 2.27 |
| 1422533_at   | Cyp51                                                                                                             | cytochrome P450, family 51                                                                                                                                                        | 2.26 |
| 1437868_at   | BC023892                                                                                                          | cDNA sequence BC023892                                                                                                                                                            | 2.23 |
| 1437667_a_at | Bach2                                                                                                             | BTB and CNC homology 2                                                                                                                                                            | 2.22 |
| 1449119_at   | Arih2                                                                                                             | ariadne homolog 2 (Drosophila)                                                                                                                                                    | 2.15 |
| 1437711_x_at | EG666231 ///<br>EG668343 ///<br>LOC546355 ///<br>LOC627245 ///<br>LOC632337 ///<br>LOC665017 ///<br>LOC676173 /// | ornithine decarboxylase, structural 1 /// similar to<br>Ornithine decarboxylase (ODC) /// similar to Odc1<br>protein /// predicted gene, EG666231 /// predicted<br>gene, EG668343 | 2.14 |
| 1451299_at   | Prkx                                                                                                              | protein kinase, X-linked                                                                                                                                                          | 2.10 |
| 1451819_at   | Zswim6                                                                                                            | zinc finger, SWIM domain containing 6                                                                                                                                             | 2.09 |
| 1455271_at   | LOC620695                                                                                                         | hypothetical protein LOC620695                                                                                                                                                    | 2.08 |
| 1453119_at   | Otud1                                                                                                             | OTU domain containing 1                                                                                                                                                           | 2.07 |

|              |                  |                                                                                                                                   |       |
|--------------|------------------|-----------------------------------------------------------------------------------------------------------------------------------|-------|
| 1427005_at   | Plk2             | polo-like kinase 2 (Drosophila)                                                                                                   | 2.02  |
| 1444878_at   | ---              | Adult male hippocampus cDNA, RIKEN full-length enriched library, clone:C630003L08<br>product:unclassifiable, full insert sequence | 2.01  |
| 1460632_at   | ---              | Transcribed locus                                                                                                                 | 2.00  |
| 1455145_at   | Pcdh19           | protocadherin 19                                                                                                                  | -2.00 |
| 1440295_at   | 1110057K04Rik    | RIKEN cDNA 1110057K04 gene                                                                                                        | -2.00 |
| 1450219_at   | Htr1a            | 5-hydroxytryptamine (serotonin) receptor 1A                                                                                       | -2.00 |
| 1428162_at   | 4933421E11Rik    | RIKEN cDNA 4933421E11 gene                                                                                                        | -2.00 |
| 1460369_at   | BC003267         | cDNA sequence BC003267                                                                                                            | -2.01 |
| 1460570_at   | Pgbd5            | piggyBac transposable element derived 5                                                                                           | -2.01 |
| 1426651_at   | Mrpl44           | mitochondrial ribosomal protein L44                                                                                               | -2.01 |
| 1436908_at   | LOC100044052     | similar to pericentriolar material gene 1 protein                                                                                 | -2.02 |
| 1437147_at   | Gabrg2           | gamma-aminobutyric acid (GABA-A) receptor, subunit gamma 2                                                                        | -2.02 |
| 1450227_at   | Ankrd6           | ankyrin repeat domain 6                                                                                                           | -2.02 |
| 1436860_at   | Senp7            | SUMO1/sentrin specific peptidase 7                                                                                                | -2.02 |
| 1428972_at   | Tctex1d2         | Tctex1 domain containing 2                                                                                                        | -2.02 |
| 1434140_at   | Mcf2l            | mcf.2 transforming sequence-like                                                                                                  | -2.03 |
| 1441963_at   | RP23-100C5.8     | ProSAPiP1 protein                                                                                                                 | -2.03 |
| 1418954_at   | Camkk1           | calcium/calmodulin-dependent protein kinase kinase 1, alpha                                                                       | -2.03 |
| 1428207_at   | Bcl7a            | B-cell CLL/lymphoma 7A                                                                                                            | -2.03 |
| 1438068_at   | ---              | Transcribed locus, strongly similar to XP_579813.1 hypothetical protein XP_579813 [Rattus norvegicus]                             | -2.04 |
| 1419574_at   | Zfp292           | zinc finger protein 292                                                                                                           | -2.04 |
| 1429451_at   | 2610301B20Rik    | RIKEN cDNA 2610301B20 gene                                                                                                        | -2.04 |
| 1460576_at   | LOC100047539     | similar to SEC15 homolog                                                                                                          | -2.04 |
| 1451398_at   | Cbr4 ///         | carbonyl reductase 4 ///<br>similar to carbonic reductase 4                                                                       | -2.05 |
| 1429089_s_at | 2900026A02Rik    | RIKEN cDNA 2900026A02 gene                                                                                                        | -2.05 |
| 1436021_at   | Mfsd4            | major facilitator superfamily domain containing 4                                                                                 | -2.05 |
| 1425593_at   | Tnpo2            | transportin 2 (importin 3, karyopherin beta 2b)                                                                                   | -2.06 |
| 1417147_at   | B230317C12Rik    | RIKEN cDNA B230317C12 gene                                                                                                        | -2.06 |
| 1418057_at   | Tiam1            | T-cell lymphoma invasion and metastasis 1                                                                                         | -2.06 |
| 1454973_at   | Atf7ip           | activating transcription factor 7 interacting protein                                                                             | -2.07 |
| 1440836_at   | Setd1b           | SET domain containing 1B                                                                                                          | -2.07 |
| 1429390_at   | Acpl2            | acid phosphatase-like 2                                                                                                           | -2.07 |
| 1418048_at   | 1110059G10Rik    | RIKEN cDNA 1110059G10 gene                                                                                                        | -2.07 |
| 1435796_at   | ---              | ---                                                                                                                               | -2.08 |
| 1420871_at   | Gucy1b3          | guanylate cyclase 1, soluble, beta 3                                                                                              | -2.08 |
| 1439497_at   | 4933415E08Rik    | RIKEN cDNA 4933415E08 gene                                                                                                        | -2.08 |
| 1437183_at   | LOC100045241 /// | leucine rich repeat containing 4B ///<br>similar to                                                                               | -2.08 |
| 1434675_at   | Lrrc4b           | Leucine rich repeat containing 4B                                                                                                 | -2.09 |
| 1421043_s_at | 1700065O13Rik    | RIKEN cDNA 1700065O13 gene                                                                                                        | -2.09 |
| 1421043_s_at | Arhgef2          | rho/rac guanine nucleotide exchange factor (GEF) 2                                                                                | -2.09 |
| 1428305_at   | Pcsk2            | proprotein convertase subtilisin/kexin type 2                                                                                     | -2.09 |
| 1427990_at   | Usp45            | ubiquitin specific peptidase 45                                                                                                   | -2.09 |
| 1427025_at   | Mtmt7            | myotubularin related protein 7                                                                                                    | -2.09 |
| 1437292_at   | Rlbp1l2          | retinaldehyde binding protein 1-like 2                                                                                            | -2.09 |
| 1449425_at   | Wnt2             | wingless-related MMTV integration site 2                                                                                          | -2.09 |
| 1450114_at   | Ksr1             | kinase suppressor of ras 1                                                                                                        | -2.09 |

|              |               |                                                                                                                                        |       |
|--------------|---------------|----------------------------------------------------------------------------------------------------------------------------------------|-------|
| 1457325_at   | Kcns2         | K+ voltage-gated channel, subfamily S, 2                                                                                               | -2.10 |
| 1453342_at   | Cdc40         | cell division cycle 40 homolog (yeast)                                                                                                 | -2.11 |
| 1435809_at   | Ankrd34       | ankyrin repeat domain 34                                                                                                               | -2.12 |
| 1439024_at   | Bag4          | BCL2-associated athanogene 4                                                                                                           | -2.12 |
| 1436275_at   | Kcnp2         | Kv channel-interacting protein 2                                                                                                       | -2.13 |
| 1447788_s_at | Tspyl3        | TSPY-like 3                                                                                                                            | -2.13 |
| 1446041_at   | ---           | ---                                                                                                                                    | -2.13 |
| 1419811_at   | D16Wsu65e     | DNA segment, Chr 16, Wayne State University 65, expressed                                                                              | -2.14 |
| 1417302_at   | Rcor2         | REST corepressor 2                                                                                                                     | -2.14 |
| 1435984_at   | 1110033F14Rik | RIKEN cDNA 1110033F14 gene                                                                                                             | -2.14 |
| 1435285_at   | Mpped2        | metallophosphoesterase domain containing 2                                                                                             | -2.14 |
| 1437023_at   | Zfp12         | zinc finger protein 12                                                                                                                 | -2.14 |
| 1421923_at   | Sh3bp5        | SH3-domain binding protein 5 (BTK-associated)                                                                                          | -2.14 |
| 1428186_at   | Kctd6         | potassium channel tetramerisation domain containing 6                                                                                  | -2.15 |
| 1434564_at   | E2f3          | E2F transcription factor 3                                                                                                             | -2.15 |
| 1435822_at   | D830012I24Rik | RIKEN cDNA D830012I24 gene                                                                                                             | -2.15 |
| 1441983_at   | ---           | 0 day neonate cerebellum cDNA, RIKEN full-length enriched library, clone:C230096I08 product:hypothetical protein, full insert sequence | -2.15 |
| 1455450_at   | ---           | ---                                                                                                                                    | -2.16 |
| 1418143_at   | Vps45         | vacuolar protein sorting 45 (yeast)                                                                                                    | -2.17 |
| 1428748_at   | 5830428H23Rik | RIKEN cDNA 5830428H23 gene                                                                                                             | -2.17 |
| 1452700_s_at | Kbtbd7        | kelch repeat and BTB (POZ) domain containing 7                                                                                         | -2.17 |
| 1438413_at   | Senp7         | SUMO1/sentrin specific peptidase 7                                                                                                     | -2.17 |
| 1423471_at   | Ptbp2         | polypyrimidine tract binding protein 2                                                                                                 | -2.18 |
| 1435391_at   | Prr8          | proline rich 8                                                                                                                         | -2.18 |
| 1448063_at   | Iqsec2        | IQ motif and Sec7 domain 2                                                                                                             | -2.18 |
| 1458515_at   | Zfp128        | zinc finger protein 128                                                                                                                | -2.19 |
| 1417236_at   | Ehd3          | EH-domain containing 3                                                                                                                 | -2.19 |
| 1440264_at   | ---           | Adult male aorta and vein cDNA, RIKEN full-length enriched library, clone:A530010O07 product:unclassifiable, full insert sequence      | -2.20 |
| 1428192_at   | Kbtbd7        | kelch repeat and BTB (POZ) domain containing 7                                                                                         | -2.21 |
| 1437528_x_at | A730017C20Rik | RIKEN cDNA A730017C20 gene                                                                                                             | -2.21 |
| 1441305_at   | ---           | Adult male corpus striatum cDNA, RIKEN full-length enriched library, clone:C030044L04 product:unclassifiable, full insert sequence     | -2.21 |
| 1428338_at   | Spata2L       | spermatogenesis associated 2-like                                                                                                      | -2.22 |
| 1438417_at   | Pwwp2b        | PWWP domain containing 2B                                                                                                              | -2.22 |
| 1444978_at   | Foxp1         | Forkhead box P1                                                                                                                        | -2.22 |
| 1438328_at   | Hcfc2         | host cell factor C2                                                                                                                    | -2.22 |
| 1417575_at   | Otub2         | OTU domain, ubiquitin aldehyde binding 2                                                                                               | -2.22 |
| 1456789_at   | Zfp462        | zinc finger protein 462                                                                                                                | -2.22 |
| 1424044_at   | Jmjd2b        | jumonji domain containing 2B                                                                                                           | -2.22 |
| 1447852_x_at | Rilpl1        | Rab interacting lysosomal protein-like 1                                                                                               | -2.23 |
| 1441801_at   | Kctd4         | potassium channel tetramerisation domain containing 4                                                                                  | -2.23 |
| 1438710_at   | Htr1a         | 5-hydroxytryptamine (serotonin) receptor 1A                                                                                            | -2.23 |

|              |                                         |                                                                                                                                                       |       |
|--------------|-----------------------------------------|-------------------------------------------------------------------------------------------------------------------------------------------------------|-------|
| 1434776_at   | Sema5a                                  | sema domain, seven thrombospondin repeats (type 1 and type 1-like), transmembrane domain (TM) and short cytoplasmic domain, (semaphorin) 5A           | -2.24 |
| 1424784_at   | OTTMUSG00000010657                      | predicted gene, OTTMUSG00000010657                                                                                                                    | -2.24 |
| 1437168_at   | Srrp                                    | serine-arginine repressor protein                                                                                                                     | -2.24 |
| 1434638_at   | ---                                     | Adult male corpora quadrigemina cDNA, RIKEN full-length enriched library, clone:B230036G05 product:unclassifiable, full insert sequence               | -2.25 |
| 1455463_at   | Phyhip                                  | phytanoyl-CoA hydroxylase interacting protein                                                                                                         | -2.25 |
| 1418109_at   | Gspt2                                   | G1 to S phase transition 2                                                                                                                            | -2.25 |
| 1449173_at   | Mpp2                                    | membrane protein, palmitoylated 2 (MAGUK p55 subfamily member 2)                                                                                      | -2.26 |
| 1432813_at   | 2900064F13Rik                           | RIKEN cDNA 2900064F13 gene                                                                                                                            | -2.28 |
| 1452065_at   | Vstm2a                                  | V-set and transmembrane domain containing 2A                                                                                                          | -2.29 |
| 1430301_at   | Stxbp5                                  | syntaxin binding protein 5 (tomosyn)                                                                                                                  | -2.30 |
| 1451245_at   | Lrrc3b                                  | leucine rich repeat containing 3B                                                                                                                     | -2.30 |
| 1439993_at   | ---                                     | Transcribed locus                                                                                                                                     | -2.31 |
| 1429105_at   | Dlgap1                                  | discs, large (Drosophila) homolog-associated protein 1                                                                                                | -2.31 |
| 1425344_at   | Narf                                    | nuclear prelamin A recognition factor                                                                                                                 | -2.32 |
| 1417235_at   | Ehd3                                    | EH-domain containing 3                                                                                                                                | -2.33 |
| 1456423_at   | Mbd5                                    | methyl-CpG binding domain protein 5                                                                                                                   | -2.33 |
| 1455700_at   | Mterfd3                                 | MTERF domain containing 3                                                                                                                             | -2.34 |
| 1451566_at   | Zfp810                                  | zinc finger protein 810                                                                                                                               | -2.34 |
| 1442157_at   | A930041H05Rik                           | RIKEN cDNA A930041H05 gene                                                                                                                            | -2.36 |
| 1419732_at   | Rtn4r                                   | reticulon 4 receptor                                                                                                                                  | -2.36 |
| 1435311_s_at | Fbxo7                                   | F-box protein 7                                                                                                                                       | -2.37 |
| 1441327_a_at | Ssr1                                    | signal sequence receptor, alpha                                                                                                                       | -2.38 |
| 1457628_at   | Ccdc53                                  | coiled-coil domain containing 53                                                                                                                      | -2.39 |
| 1424697_at   | Dtwd1                                   | DTW domain containing 1                                                                                                                               | -2.39 |
| 1435396_at   | Stxbp6                                  | syntaxin binding protein 6 (amisyn)                                                                                                                   | -2.39 |
| 1460588_at   | ---                                     | 10 days lactation, adult female mammary gland cDNA, RIKEN full-length enriched library, clone:D730013G10 product:unclassifiable, full insert sequence | -2.40 |
| 1435344_at   | 1110029I05Rik /// LOC100044848          | RIKEN cDNA 1110029I05 gene /// hypothetical protein LOC100044848                                                                                      | -2.41 |
| 1455476_a_at | Gse1                                    | genetic suppressor element 1                                                                                                                          | -2.41 |
| 1456764_at   | Slc35f3                                 | solute carrier family 35, member F3                                                                                                                   | -2.43 |
| 1436972_at   | Gpr61 /// LOC100043654 /// LOC100047381 | G protein-coupled receptor 61 /// hypothetical protein LOC100043654 /// hypothetical protein LOC100047381                                             | -2.43 |
| 1455365_at   | Cdh8                                    | cadherin 8                                                                                                                                            | -2.44 |
| 1422710_a_at | Cacna1h                                 | calcium channel, voltage-dependent, T type, alpha 1H subunit                                                                                          | -2.44 |
| 1417941_at   | Nanp                                    | N-acetylneuraminic acid phosphatase                                                                                                                   | -2.48 |
| 1427646_a_at | Arhgef2                                 | rho/rac guanine nucleotide exchange factor (GEF) 2                                                                                                    | -2.48 |
| 1452092_at   | 4631426J05Rik                           | RIKEN cDNA 4631426J05 gene                                                                                                                            | -2.51 |
| 1415935_at   | Smoc2                                   | SPARC related modular calcium binding 2                                                                                                               | -2.52 |
| 1429918_at   | Arhgap20                                | Rho GTPase activating protein 20                                                                                                                      | -2.53 |

|              |                          |                                                                                                                                                                      |       |
|--------------|--------------------------|----------------------------------------------------------------------------------------------------------------------------------------------------------------------|-------|
| 1435411_at   | Neurod2                  | neurogenic differentiation 2                                                                                                                                         | -2.54 |
| 1415774_at   | Elp2                     | elongation protein 2 homolog (S. cerevisiae)                                                                                                                         | -2.54 |
| 1442272_at   | 1700021K10Rik            | RIKEN cDNA 1700021K10 gene                                                                                                                                           | -2.55 |
| 1452041_at   | Klhl26                   | kelch-like 26 (Drosophila)                                                                                                                                           | -2.57 |
| 1437966_at   | Prرت3                    | proline-rich transmembrane protein 3                                                                                                                                 | -2.57 |
| 1456197_x_at | Ajap1                    | Adherens junction associated protein 1                                                                                                                               | -2.60 |
| 1452248_at   | Plekhg5                  | pleckstrin homology domain containing, family G (with RhoGef domain) member 5                                                                                        | -2.64 |
| 1421042_at   | Arhgef2                  | rho/rac guanine nucleotide exchange factor (GEF) 2                                                                                                                   | -2.67 |
| 1437083_at   | Tmem169                  | transmembrane protein 169                                                                                                                                            | -2.68 |
| 1455000_at   | Gpr68                    | G protein-coupled receptor 68                                                                                                                                        | -2.69 |
| 1435469_at   | Qsox2                    | quiescin Q6 sulfhydryl oxidase 2                                                                                                                                     | -2.69 |
| 1431724_a_at | P2ry12                   | purinergic receptor P2Y, G-protein coupled 12                                                                                                                        | -2.69 |
| 1433793_s_at | Nrip2                    | nuclear receptor interacting protein 2                                                                                                                               | -2.70 |
| 1443287_at   | Gm1337                   | gene model 1337, (NCBI)                                                                                                                                              | -2.71 |
| 1434655_at   | Foxk1                    | forkhead box K1                                                                                                                                                      | -2.71 |
| 1429741_at   | Kcnv1                    | potassium channel, subfamily V, member 1                                                                                                                             | -2.72 |
| 1440181_at   | Gm1568                   | gene model 1568, (NCBI)                                                                                                                                              | -2.74 |
| 1446612_at   | 9330118A15Rik            | RIKEN cDNA 9330118A15 gene                                                                                                                                           | -2.74 |
| 1447385_at   | ---                      | Adult male corpora quadrigemina cDNA, RIKEN full-length enriched library, clone:B230036G05 product:unclassifiable, full insert sequence                              | -2.78 |
| 1457729_at   | ---                      | Transcribed locus                                                                                                                                                    | -2.79 |
| 1416798_a_at | Nme4                     | expressed in non-metastatic cells 4, protein                                                                                                                         | -2.81 |
| 1435991_at   | Nr3c2                    | nuclear receptor subfamily 3, group C, member 2                                                                                                                      | -2.82 |
| 1433885_at   | Iqgap2                   | IQ motif containing GTPase activating protein 2                                                                                                                      | -2.85 |
| 1455040_s_at | 1110062M06Rik            | RIKEN cDNA 1110062M06 gene                                                                                                                                           | -2.89 |
| 1454877_at   | Sertad4                  | SERTA domain containing 4                                                                                                                                            | -2.89 |
| 1444687_at   | C1ql2                    | complement component 1, q subcomponent-like 2                                                                                                                        | -2.90 |
| 1448530_at   | Gmpr ///<br>LOC100045393 | guanosine monophosphate reductase /// similar to guanosine monophosphate reductase                                                                                   | -2.90 |
| 1460625_at   | Gm1568                   | gene model 1568, (NCBI)                                                                                                                                              | -2.94 |
| 1456838_at   | BC072620                 | cDNA sequence BC072620                                                                                                                                               | -2.96 |
| 1458406_at   | AI429294                 | Expressed sequence AI429294                                                                                                                                          | -2.98 |
| 1429167_at   | Ccdc112                  | coiled-coil domain containing 112                                                                                                                                    | -3.01 |
| 1434819_at   | St6gal2                  | beta galactoside alpha 2,6 sialyltransferase 2                                                                                                                       | -3.05 |
| 1434052_at   | AI593442                 | expressed sequence AI593442                                                                                                                                          | -3.07 |
| 1443876_at   | ---                      | 16 days neonate thymus cDNA, RIKEN full-length enriched library, clone:A130020E07 product:calcium/calmodulin-dependent protein kinase II alpha, full insert sequence | -3.12 |
| 1429191_at   | Dhx33                    | DEAH (Asp-Glu-Ala-His) box polypeptide 33                                                                                                                            | -3.14 |
| 1453847_at   | A930037O16Rik            | RIKEN cDNA A930037O16 gene                                                                                                                                           | -3.14 |
| 1444723_at   | 6530418L21Rik            | RIKEN cDNA 6530418L21 gene                                                                                                                                           | -3.17 |
| 1452966_at   | Bcl11b                   | B-cell leukemia/lymphoma 11B                                                                                                                                         | -3.25 |
| 1419008_at   | Npy5r                    | neuropeptide Y receptor Y5                                                                                                                                           | -3.27 |
| 1443800_at   | ---                      | Transcribed locus                                                                                                                                                    | -3.30 |
| 1435407_at   | ---                      | Adult male medulla oblongata cDNA, RIKEN full-length enriched library, clone:6332404K23 product:unclassifiable, full insert sequence                                 | -3.42 |
| 1418047_at   | Neurod6                  | neurogenic differentiation 6                                                                                                                                         | -3.49 |

|            |               |                                         |       |
|------------|---------------|-----------------------------------------|-------|
| 1456389_at | Zeb2          | zinc finger E-box binding homeobox 2    | -3.67 |
| 1438465_at | 5830428H23Rik | RIKEN cDNA 5830428H23 gene              | -3.99 |
| 1447726_at | Ripply2       | rippy2 homolog (zebrafish)              | -4.00 |
| 1433469_at | Lrrn2         | leucine rich repeat protein 2, neuronal | -4.36 |
| 1427610_at | Dsp           | desmoplakin                             | -4.84 |

---
