# Supplementary material for: Glial responses during epileptogenesis in Mus musculus point to potential therapeutic targets
Source: PubMed Central journal article supplement (PMC6095496; doi:10.1371/journal.pone.0201742), 2018-08-16
Supplement: pone.0201742.s006.pdf [file pone.0201742.s006.pdf]

**Table S2:** Significant gene expression changes detected by microarrays following SAM analysis at 12 hours post-injection (thresholds:  $\geq 2$  fold and 0% median FDR).

| Probe Set ID | Gene Symbol            | Gene Title                                                                               | Fold Change |
|--------------|------------------------|------------------------------------------------------------------------------------------|-------------|
| 1421134_at   | Areg                   | amphiregulin                                                                             | 47.64       |
| 1422947_at   | Hist1h4a               | histone cluster 1, H4a                                                                   | 44.89       |
| 1417488_at   | Fosl1                  | fos-like antigen 1                                                                       | 40.19       |
| 1459372_at   | Npas4                  | neuronal PAS domain protein 4                                                            | 31.03       |
| 1429157_at   | 4930507C10Rik          | RIKEN cDNA 4930507C10 gene                                                               | 30.74       |
| 1440576_at   | Cpn1                   | carboxypeptidase N, polypeptide 1                                                        | 29.20       |
| 1449982_at   | Il11                   | interleukin 11                                                                           | 23.11       |
| 1420753_at   | Tll1                   | tolloid-like                                                                             | 21.60       |
| 1422134_at   | Fosb                   | FBJ osteosarcoma oncogene B                                                              | 20.92       |
| 1417789_at   | Ccl11                  | small chemokine (C-C motif) ligand 11                                                    | 18.82       |
| 1427378_at   | Krt75                  | keratin 75                                                                               | 18.44       |
| 1452388_at   | Hspa1a                 | heat shock protein 1A                                                                    | 17.18       |
| 1423100_at   | Fos                    | FBJ osteosarcoma oncogene                                                                | 17.00       |
| 1422562_at   | Rrad                   | Ras-related associated with diabetes                                                     | 16.36       |
| 1448789_at   | Aldh1a3                | aldehyde dehydrogenase family 1, subfamily A3                                            | 16.21       |
| 1425359_at   | Mall                   | mal, T-cell differentiation protein-like                                                 | 15.84       |
| 1450297_at   | Il6                    | interleukin 6                                                                            | 15.60       |
| 1427126_at   | Hspa1b                 | heat shock protein 1B                                                                    | 15.56       |
| 1443475_at   | Hist1h3i               | Histone cluster 1, H3i                                                                   | 13.64       |
| 1427127_x_at | Hspa1b                 | heat shock protein 1B                                                                    | 13.43       |
| 1449254_at   | Spp1                   | secreted phosphoprotein 1                                                                | 12.21       |
| 1418932_at   | LOC100046232 /// Nfil3 | nuclear factor, interleukin 3, regulated /// similar to NFIL3/E4BP4 transcription factor | 11.91       |
| 1453851_a_at | Gadd45g                | growth arrest and DNA-damage-inducible 45 gamma                                          | 11.80       |
| 1425671_at   | Homer1                 | homer homolog 1 (Drosophila)                                                             | 11.52       |
| 1452409_at   | Gltscr2                | glioma tumor suppressor candidate region gene 2                                          | 11.33       |
| 1438133_a_at | Cyr61                  | cysteine rich protein 61                                                                 | 11.22       |
| 1439764_s_at | Igf2bp2                | insulin-like growth factor 2 mRNA binding protein 2                                      | 10.90       |
| 1442340_x_at | Cyr61                  | cysteine rich protein 61                                                                 | 10.27       |
| 1425964_x_at | Hspb1                  | heat shock protein 1                                                                     | 10.10       |
| 1421811_at   | LOC640441 /// Thbs1    | thrombospondin 1 /// similar to thrombospondin 1                                         | 10.08       |
| 1427682_a_at | Egr2                   | early growth response 2                                                                  | 10.03       |
| 1417262_at   | Ptgs2                  | prostaglandin-endoperoxide synthase 2                                                    | 9.89        |
| 1451596_a_at | Sphk1                  | sphingosine kinase 1                                                                     | 9.68        |
| 1422943_a_at | Hspb1                  | heat shock protein 1                                                                     | 9.30        |
| 1421396_at   | Pcsk1                  | proprotein convertase subtilisin/kexin type 1                                            | 9.26        |
| 1417263_at   | Ptgs2                  | prostaglandin-endoperoxide synthase 2                                                    | 9.23        |
| 1449960_at   | Nptx2                  | neuronal pentraxin 2                                                                     | 9.22        |

|              |                                                                                                                                                                                                                                                                                   |                                                                                                                               |      |
|--------------|-----------------------------------------------------------------------------------------------------------------------------------------------------------------------------------------------------------------------------------------------------------------------------------|-------------------------------------------------------------------------------------------------------------------------------|------|
| 1435137_s_at | 1200015M12Rik<br>/// 1200016E24Rik<br>///<br>A130040M12Rik<br>///<br>E430024C06Rik                                                                                                                                                                                                | RIKEN cDNA 1200015M12 gene /// RIKEN cDNA<br>1200016E24 gene /// RIKEN cDNA A130040M12<br>gene /// RIKEN cDNA E430024C06 gene | 9.11 |
| 1418572_x_at | Tnfrsf12a                                                                                                                                                                                                                                                                         | tumor necrosis factor receptor superfamily,<br>member 12a                                                                     | 8.89 |
| 1452318_a_at | Hspa1b                                                                                                                                                                                                                                                                            | heat shock protein 1B                                                                                                         | 8.71 |
| 1416039_x_at | Cyr61                                                                                                                                                                                                                                                                             | cysteine rich protein 61                                                                                                      | 8.64 |
| 1456212_x_at | Socs3                                                                                                                                                                                                                                                                             | suppressor of cytokine signaling 3                                                                                            | 8.53 |
| 1452418_at   | 1200016E24Rik ///<br>LOC100039378 ///<br>LOC100039464 ///<br>LOC100040148 ///<br>LOC100041150 ///<br>LOC100041274 ///<br>LOC100042075 ///<br>LOC100042387 ///<br>LOC100043154 ///<br>LOC100043406 ///<br>LOC100043650 ///<br>LOC100043680 ///<br>LOC100047599 ///<br>LOC100048290 | RIKEN cDNA 1200016E24 gene /// similar to gag<br>protein                                                                      | 8.46 |
| 1457984_at   | Crh                                                                                                                                                                                                                                                                               | corticotropin releasing hormone                                                                                               | 8.35 |
| 1450533_a_at | Plagl1                                                                                                                                                                                                                                                                            | pleiomorphic adenoma gene-like 1                                                                                              | 8.22 |
| 1460302_at   | LOC640441 ///<br>Thbs1                                                                                                                                                                                                                                                            | thrombospondin 1 /// similar to thrombospondin 1                                                                              | 8.19 |
| 1419772_at   | ---                                                                                                                                                                                                                                                                               | Transcribed locus                                                                                                             | 8.18 |
| 1417335_at   | Sult2b1                                                                                                                                                                                                                                                                           | sulfotransferase family, cytosolic, 2B, member 1                                                                              | 7.88 |
| 1419149_at   | Serpine1                                                                                                                                                                                                                                                                          | serine (or cysteine) peptidase inhibitor, clade E,<br>member 1                                                                | 7.67 |
| 1447863_s_at | Nr4a2                                                                                                                                                                                                                                                                             | nuclear receptor subfamily 4, group A, member 2                                                                               | 7.63 |
| 1425288_at   | Samd11                                                                                                                                                                                                                                                                            | sterile alpha motif domain containing 11                                                                                      | 7.52 |
| 1417936_at   | Ccl9                                                                                                                                                                                                                                                                              | chemokine (C-C motif) ligand 9                                                                                                | 7.51 |
| 1450971_at   | Gadd45b                                                                                                                                                                                                                                                                           | growth arrest and DNA-damage-inducible 45 beta                                                                                | 7.46 |
| 1417268_at   | Cd14                                                                                                                                                                                                                                                                              | CD14 antigen                                                                                                                  | 7.33 |
| 1418349_at   | Hbegf                                                                                                                                                                                                                                                                             | heparin-binding EGF-like growth factor                                                                                        | 7.26 |

|              |                                                                                                                                                       |                                                                                                                                                                                   |      |
|--------------|-------------------------------------------------------------------------------------------------------------------------------------------------------|-----------------------------------------------------------------------------------------------------------------------------------------------------------------------------------|------|
| 1416529_at   | Emp1                                                                                                                                                  | epithelial membrane protein 1                                                                                                                                                     | 7.25 |
| 1418350_at   | Hbegf                                                                                                                                                 | heparin-binding EGF-like growth factor                                                                                                                                            | 7.25 |
| 1418687_at   | Arc                                                                                                                                                   | activity regulated cytoskeletal-associated protein                                                                                                                                | 7.19 |
| 1448239_at   | Hmox1                                                                                                                                                 | heme oxygenase (decycling) 1                                                                                                                                                      | 7.01 |
| 1420394_s_at | Gp49a /// Liltrb4                                                                                                                                     | glycoprotein 49 A /// leukocyte immunoglobulin-like receptor, subfamily B, member 4                                                                                               | 6.94 |
| 1434089_at   | Synpo                                                                                                                                                 | synaptopodin                                                                                                                                                                      | 6.84 |
| 1424638_at   | Cdkn1a                                                                                                                                                | cyclin-dependent kinase inhibitor 1A (P21)                                                                                                                                        | 6.79 |
| 1418936_at   | Maff                                                                                                                                                  | v-maf musculoaponeurotic fibrosarcoma oncogene family, protein F (avian)                                                                                                          | 6.77 |
| 1423760_at   | Cd44                                                                                                                                                  | CD44 antigen                                                                                                                                                                      | 6.71 |
| 1421854_at   | Fgl2                                                                                                                                                  | fibrinogen-like protein 2                                                                                                                                                         | 6.62 |
| 1448898_at   | Ccl9                                                                                                                                                  | chemokine (C-C motif) ligand 9                                                                                                                                                    | 6.59 |
| 1430352_at   | Adamts9                                                                                                                                               | a disintegrin-like and metallopeptidase (reprolysin type) with thrombospondin type 1 motif, 9                                                                                     | 6.58 |
| 1434376_at   | Cd44                                                                                                                                                  | CD44 antigen                                                                                                                                                                      | 6.47 |
| 1419598_at   | Ms4a6d                                                                                                                                                | membrane-spanning 4-domains, subfamily A, member 6D                                                                                                                               | 6.35 |
| 1426808_at   | Lgals3                                                                                                                                                | lectin, galactose binding, soluble 3                                                                                                                                              | 6.34 |
| 1417487_at   | Fosl1                                                                                                                                                 | fos-like antigen 1                                                                                                                                                                | 6.34 |
| 1418571_at   | Tnfrsf12a                                                                                                                                             | tumor necrosis factor receptor superfamily, member 12a                                                                                                                            | 6.31 |
| 1427683_at   | Egr2                                                                                                                                                  | early growth response 2                                                                                                                                                           | 6.20 |
| 1418133_at   | Bcl3                                                                                                                                                  | B-cell leukemia/lymphoma 3                                                                                                                                                        | 6.13 |
| 1420380_at   | Ccl2                                                                                                                                                  | chemokine (C-C motif) ligand 2                                                                                                                                                    | 5.98 |
| 1448074_at   | Rln1                                                                                                                                                  | Relaxin 1                                                                                                                                                                         | 5.98 |
| 1434350_at   | Axud1                                                                                                                                                 | AXIN1 up-regulated 1                                                                                                                                                              | 5.90 |
| 1433599_at   | Baz1a                                                                                                                                                 | bromodomain adjacent to zinc finger domain 1A                                                                                                                                     | 5.75 |
| 1432831_at   | Ccdc138                                                                                                                                               | coiled-coil domain containing 138                                                                                                                                                 | 5.67 |
| 1422452_at   | Bag3                                                                                                                                                  | Bcl2-associated athanogene 3                                                                                                                                                      | 5.62 |
| 1416266_at   | Pdyn                                                                                                                                                  | prodynorphin                                                                                                                                                                      | 5.52 |
| 1450750_a_at | Nr4a2                                                                                                                                                 | nuclear receptor subfamily 4, group A, member 2                                                                                                                                   | 5.46 |
| 1437247_at   | Fosl2 ///<br>LOC634417                                                                                                                                | fos-like antigen 2 /// similar to fos-like antigen 2                                                                                                                              | 5.43 |
| 1451680_at   | Srxn1                                                                                                                                                 | sulfiredoxin 1 homolog (S. cerevisiae)                                                                                                                                            | 5.43 |
| 1427932_s_at | 1200003110Rik ///<br>1200015M12Rik<br>1200016E24Rik<br>/// 1200016E24Rik gene ///<br>///<br>A130040M12Rik<br>///<br>E430024C06Rik<br>/// LOC100039464 | RIKEN cDNA 1200003110 gene /// RIKEN cDNA 1200015M12 gene /// RIKEN cDNA 1200016E24 gene /// RIKEN cDNA A130040M12 gene /// RIKEN cDNA E430024C06 gene /// similar to gag protein | 5.39 |
| 1422931_at   | Fosl2                                                                                                                                                 | fos-like antigen 2                                                                                                                                                                | 5.31 |
| 1435872_at   | ---                                                                                                                                                   | Transcribed locus                                                                                                                                                                 | 5.30 |
| 1428909_at   | A130040M12Rik                                                                                                                                         | RIKEN cDNA A130040M12 gene                                                                                                                                                        | 5.19 |
| 1427414_at   | Prkar2a                                                                                                                                               | protein kinase, cAMP dependent regulatory, type II alpha                                                                                                                          | 5.14 |
| 1426063_a_at | Gem                                                                                                                                                   | GTP binding protein (gene overexpressed in skeletal muscle)                                                                                                                       | 5.10 |

|              |                  |                                                                            |      |
|--------------|------------------|----------------------------------------------------------------------------|------|
| 1420994_at   | B3gnt5           | UDP-GlcNAc:betaGal beta-1,3-N-acetylglucosaminyltransferase 5              | 4.91 |
| 1422256_at   | Sstr2            | somatostatin receptor 2                                                    | 4.90 |
| 1455130_at   | Spty2d1          | SPT2, Suppressor of Ty, domain containing 1 (S. cerevisiae)                | 4.88 |
| 1426875_s_at | Srxn1            | sulfiredoxin 1 homolog (S. cerevisiae)                                     | 4.87 |
| 1444982_at   | ---              | ---                                                                        | 4.84 |
| 1437173_at   | Edg3             | endothelial differentiation, sphingolipid G-protein-coupled receptor, 3    | 4.81 |
| 1454399_at   | 2010003H20Rik    | RIKEN cDNA 2010003H20 gene                                                 | 4.79 |
| 1438658_a_at | Edg3             | endothelial differentiation, sphingolipid G-protein-coupled receptor, 3    | 4.76 |
| 1419599_s_at | Ms4a6d           | membrane-spanning 4-domains, subfamily A, member 6D                        | 4.75 |
| 1419091_a_at | Anxa2            | annexin A2                                                                 | 4.66 |
| 1422825_at   | Cartpt           | CART prepropeptide                                                         | 4.62 |
| 1451160_s_at | Pvr              | poliovirus receptor                                                        | 4.60 |
| 1417266_at   | Ccl6             | chemokine (C-C motif) ligand 6                                             | 4.60 |
| 1421855_at   | Fgl2             | fibrinogen-like protein 2                                                  | 4.59 |
| 1431231_at   | Hist1h3b ///     | histone cluster 2, H3c1 ///                                                | 4.59 |
|              | Hist1h3d ///     | /// histone cluster 1, H3f ///                                             |      |
|              | Hist1h3e ///     | /// histone cluster 1, H3b ///                                             |      |
|              | Hist1h3f ///     | /// histone cluster 2, H3b                                                 |      |
|              | Hist2h3b ///     |                                                                            |      |
|              | Hist2h3c1 ///    |                                                                            |      |
|              | Hist2h3c2        |                                                                            |      |
| 1419247_at   | Rgs2             | regulator of G-protein signaling 2                                         | 4.58 |
| 1418547_at   | Tfpi2            | tissue factor pathway inhibitor 2                                          | 4.54 |
| 1434885_at   | Spty2d1          | SPT2, Suppressor of Ty, domain containing 1 (S. cerevisiae)                | 4.47 |
| 1456046_at   | Cd93             | CD93 antigen                                                               | 4.47 |
| 1452534_a_at | Hmgb2            | high mobility group box 2                                                  | 4.45 |
| 1452160_at   | Tiparp           | TCDD-inducible poly(ADP-ribose) polymerase                                 | 4.44 |
| 1428776_at   | Slc10a6          | solute carrier family 10 (sodium/bile acid cotransporter family), member 6 | 4.41 |
| 1448830_at   | Dusp1            | dual specificity phosphatase 1                                             | 4.38 |
| 1451415_at   | 1810011O10Rik    | RIKEN cDNA 1810011O10 gene                                                 | 4.36 |
| 1426348_at   | Col4a1           | collagen, type IV, alpha 1                                                 | 4.36 |
| 1421578_at   | Ccl4             | chemokine (C-C motif) ligand 4                                             | 4.36 |
| 1439407_x_at | Tagln2           | transgelin 2                                                               | 4.35 |
| 1421973_at   | Gfra1            | glial cell line derived neurotrophic factor family receptor alpha 1        | 4.32 |
| 1447825_x_at | Pcdh8            | protocadherin 8                                                            | 4.29 |
| 1448061_at   | Msr1             | macrophage scavenger receptor 1                                            | 4.25 |
| 1427299_at   | Rps6ka3          | ribosomal protein S6 kinase polypeptide 3                                  | 4.24 |
| 1417601_at   | Rgs1             | regulator of G-protein signaling 1                                         | 4.22 |
| 1454742_at   | LOC100044232 /// | RasGEF domain family, member 1B ///                                        | 4.19 |
|              | Rasgef1b         | hypothetical protein LOC100044232                                          |      |
| 1452519_a_at | Zfp36            | zinc finger protein 36                                                     | 4.19 |
| 1419589_at   | Cd93             | CD93 antigen                                                               | 4.19 |
| 1438783_at   | AW742560         | Expressed sequence AW742560                                                | 4.16 |
| 1450767_at   | Nedd9            | neural precursor cell expressed, developmentally down-regulated gene 9     | 4.16 |
| 1433675_at   | Snhg1            | small nucleolar RNA host gene (non-protein coding) 1                       | 4.15 |

|              |                                       |                                                                                                                                                               |      |
|--------------|---------------------------------------|---------------------------------------------------------------------------------------------------------------------------------------------------------------|------|
| 1416811_s_at | Ctla2a /// Ctla2b                     | cytotoxic T lymphocyte-associated protein 2 alpha<br>/// cytotoxic T lymphocyte-associated protein 2<br>beta                                                  | 4.14 |
| 1435595_at   | 1810011O10Rik                         | RIKEN cDNA 1810011O10 gene                                                                                                                                    | 4.13 |
| 1436659_at   | Dclk1                                 | doublecortin-like kinase 1                                                                                                                                    | 4.11 |
| 1424067_at   | Icam1                                 | intercellular adhesion molecule                                                                                                                               | 4.10 |
| 1449227_at   | Ch25h                                 | cholesterol 25-hydroxylase                                                                                                                                    | 4.03 |
| 1422169_a_at | Bdnf                                  | brain derived neurotrophic factor                                                                                                                             | 4.02 |
| 1419004_s_at | Bcl2a1a ///<br>Bcl2a1b ///<br>Bcl2a1d | B-cell leukemia/lymphoma 2 related protein A1a<br>/// B-cell leukemia/lymphoma 2 related<br>protein A1b /// B-cell leukemia/lymphoma 2 related<br>protein A1d | 4.00 |
| 1419884_at   | ---                                   | Transcribed locus                                                                                                                                             | 4.00 |
| 1423312_at   | Tpbp                                  | trophoblast glycoprotein                                                                                                                                      | 3.99 |
| 1450708_at   | Scg2                                  | secretogranin II                                                                                                                                              | 3.97 |
| 1417426_at   | Srgn                                  | serglycin                                                                                                                                                     | 3.91 |
| 1437132_x_at | Nedd9                                 | neural precursor cell expressed, developmentally<br>down-regulated gene 9                                                                                     | 3.89 |
| 1435458_at   | Pim1                                  | proviral integration site 1                                                                                                                                   | 3.88 |
| 1425434_a_at | Msr1                                  | macrophage scavenger receptor 1                                                                                                                               | 3.88 |
| 1457276_at   | Snf1lk2                               | SNF1-like kinase 2                                                                                                                                            | 3.87 |
| 1456453_at   | ---                                   | ---                                                                                                                                                           | 3.85 |
| 1416700_at   | Rnd3                                  | Rho family GTPase 3                                                                                                                                           | 3.85 |
| 1418674_at   | Osmr                                  | oncostatin M receptor                                                                                                                                         | 3.84 |
| 1416067_at   | Ifrd1                                 | interferon-related developmental regulator 1                                                                                                                  | 3.75 |
| 1452352_at   | Ctla2b                                | cytotoxic T lymphocyte-associated protein 2 beta                                                                                                              | 3.74 |
| 1455034_at   | ---                                   | ---                                                                                                                                                           | 3.72 |
| 1416755_at   | Dnajb1                                | DnaJ (Hsp40) homolog, subfamily B, member 1                                                                                                                   | 3.70 |
| 1423905_at   | Pvr                                   | poliovirus receptor                                                                                                                                           | 3.66 |
| 1430407_at   | 3110035C09Rik                         | RIKEN cDNA 3110035C09 gene                                                                                                                                    | 3.66 |
| 1455872_at   | BC065085                              | cDNA sequence BC065085                                                                                                                                        | 3.62 |
| 1419248_at   | Rgs2                                  | regulator of G-protein signaling 2                                                                                                                            | 3.61 |
| 1437103_at   | Igf2bp2                               | insulin-like growth factor 2 mRNA binding protein<br>2                                                                                                        | 3.60 |
| 1416600_a_at | Rcan1                                 | regulator of calcineurin 1                                                                                                                                    | 3.60 |
| 1417051_at   | Pcdh8                                 | protocadherin 8                                                                                                                                               | 3.59 |
| 1428783_at   | Prkar2a                               | protein kinase, cAMP dependent regulatory, type<br>II alpha                                                                                                   | 3.59 |
| 1427540_at   | Zwint                                 | ZW10 interactor                                                                                                                                               | 3.58 |
| 1416893_at   | 3110001A13Rik                         | RIKEN cDNA 3110001A13 gene                                                                                                                                    | 3.57 |
| 1416762_at   | S100a10                               | S100 calcium binding protein A10 (calpactin)                                                                                                                  | 3.57 |
| 1450958_at   | Tm4sf1                                | transmembrane 4 superfamily member 1                                                                                                                          | 3.57 |
| 1416442_at   | Ier2                                  | immediate early response 2                                                                                                                                    | 3.55 |
| 1416756_at   | Dnajb1                                | DnaJ (Hsp40) homolog, subfamily B, member 1                                                                                                                   | 3.54 |
| 1449037_at   | Crem                                  | cAMP responsive element modulator                                                                                                                             | 3.53 |
| 1447448_s_at | Klf6                                  | Kruppel-like factor 6                                                                                                                                         | 3.52 |
| 1415855_at   | Kitl                                  | kit ligand                                                                                                                                                    | 3.51 |
| 1444307_at   | ---                                   | Transcribed locus                                                                                                                                             | 3.50 |
| 1450710_at   | Jarid2                                | jumonji, AT rich interactive domain 2                                                                                                                         | 3.48 |
| 1450716_at   | Adamts1                               | a disintegrin-like and metalloproteinase (reprolysin<br>type) with thrombospondin type 1 motif, 1                                                             | 3.48 |
| 1426721_s_at | Tiparp                                | TCDD-inducible poly(ADP-ribose) polymerase                                                                                                                    | 3.47 |

|              |               |                                                                                   |      |
|--------------|---------------|-----------------------------------------------------------------------------------|------|
| 1418892_at   | Rhoj          | ras homolog gene family, member J                                                 | 3.42 |
| 1417406_at   | Sertad1       | SERTA domain containing 1                                                         | 3.39 |
| 1417719_at   | Sap30         | sin3 associated polypeptide                                                       | 3.35 |
| 1432176_a_at | Eng           | endoglin                                                                          | 3.33 |
| 1450379_at   | Msn           | moesin                                                                            | 3.32 |
| 1456642_x_at | S100a10       | S100 calcium binding protein A10 (calpactin)                                      | 3.32 |
| 1448069_at   | Tm4sf1        | transmembrane 4 superfamily member 1                                              | 3.32 |
| 1442606_at   | ---           | ---                                                                               | 3.32 |
| 1417523_at   | Plek          | pleckstrin                                                                        | 3.31 |
| 1425993_a_at | Hsp110        | heat shock protein 110                                                            | 3.30 |
| 1445918_at   | Tmem2         | Transmembrane protein 2                                                           | 3.29 |
| 1433842_at   | Lrrfip1       | leucine rich repeat (in FLII) interacting protein 1                               | 3.27 |
| 1416601_a_at | Rcan1         | regulator of calcineurin 1                                                        | 3.27 |
| 1435906_x_at | Gbp2          | guanylate nucleotide binding protein 2                                            | 3.27 |
| 1420249_s_at | Ccl6          | chemokine (C-C motif) ligand 6                                                    | 3.26 |
| 1417109_at   | Tinagl        | tubulointerstitial nephritis antigen-like                                         | 3.25 |
| 1419100_at   | Serpina3n     | serine (or cysteine) peptidase inhibitor, clade A, member 3N                      | 3.25 |
| 1434447_at   | Met           | met proto-oncogene                                                                | 3.23 |
| 1440831_at   | Bach1         | BTB and CNC homology 1                                                            | 3.22 |
| 1417273_at   | Pdk4          | pyruvate dehydrogenase kinase, isoenzyme 4                                        | 3.22 |
| 1438761_a_at | EG666231 ///  | ornithine decarboxylase, structural 1 ///                                         | 3.21 |
|              | EG668343 ///  | Ornithine decarboxylase (ODC) ///                                                 |      |
|              | LOC546355 /// | protein ///                                                                       |      |
|              | LOC627245 /// | predicted gene, EG666231 ///                                                      |      |
|              | LOC632337 /// | predicted gene, EG668343                                                          |      |
|              | LOC677259 /// |                                                                                   |      |
|              | Odc1          |                                                                                   |      |
| 1426246_at   | Pros1         | protein S (alpha)                                                                 | 3.21 |
| 1437481_at   | LOC623451     | hypothetical LOC623451                                                            | 3.20 |
| 1423566_a_at | Hsp110        | heat shock protein 110                                                            | 3.19 |
| 1428083_at   | 2310043N10Rik | RIKEN cDNA 2310043N10 gene                                                        | 3.18 |
| 1436305_at   | Rnf217        | ring finger protein 217                                                           | 3.18 |
| 1419816_s_at | Errfi1        | ERBB receptor feedback inhibitor 1                                                | 3.18 |
| 1456610_at   | Jmjd3         | jumonji domain containing 3                                                       | 3.18 |
| 1452207_at   | Cited2        | Cbp/p300-interacting transactivator, with Glu/Asp-rich carboxy-terminal domain, 2 | 3.17 |
| 1438725_at   | Med13         | mediator complex subunit 13                                                       | 3.16 |
| 1416881_at   | LOC632101 /// | myeloid cell leukemia sequence 1 ///                                              | 3.15 |
|              | Mcl1          | myeloid cell leukemia sequence 1                                                  |      |
| 1416212_at   | Magoh         | mago-nashi homolog, proliferation-associated (Drosophila)                         | 3.15 |
| 1426871_at   | Fbxo33        | F-box protein 33                                                                  | 3.15 |
| 1416129_at   | Errfi1        | ERBB receptor feedback inhibitor 1                                                | 3.14 |
| 1417818_at   | Wwtr1         | WW domain containing transcription regulator 1                                    | 3.14 |
| 1451264_at   | Frmf6         | FERM domain containing 6                                                          | 3.13 |
| 1425162_at   | Rorb          | RAR-related orphan receptor beta                                                  | 3.13 |
| 1433508_at   | Klf6          | Kruppel-like factor 6                                                             | 3.12 |
| 1417409_at   | Jun           | Jun oncogene                                                                      | 3.11 |
| 1433674_a_at | Snhg1         | small nucleolar RNA host gene (non-protein coding) 1                              | 3.09 |
| 1434976_x_at | Eif4ebp1      | eukaryotic translation initiation factor 4E binding protein 1                     | 3.09 |
| 1419483_at   | C3ar1         | complement component 3a receptor 1                                                | 3.08 |
| 1448318_at   | Adfp          | adipose differentiation related protein                                           | 3.08 |

|              |               |                                                                        |      |
|--------------|---------------|------------------------------------------------------------------------|------|
| 1417413_at   | Cuzd1         | CUB and zona pellucida-like domains 1                                  | 3.08 |
| 1423904_a_at | Pvr           | poliovirus receptor                                                    | 3.07 |
| 1425896_a_at | Fbn1          | fibrillin 1                                                            | 3.07 |
| 1448117_at   | Kitl          | kit ligand                                                             | 3.06 |
| 1458308_at   | Sbno2         | strawberry notch homolog 2 (Drosophila)                                | 3.06 |
| 1423903_at   | Pvr           | poliovirus receptor                                                    | 3.06 |
| 1448503_at   | LOC632101 /// | myeloid cell leukemia sequence 1 ///                                   | 3.05 |
|              | Mcl1          | myeloid cell leukemia sequence 1                                       |      |
| 1457676_at   | Tirap         | toll-interleukin 1 receptor (TIR) domain-containing adaptor protein    | 3.04 |
| 1455247_at   | Amotl1        | angiomotin-like 1                                                      | 3.02 |
| 1433883_at   | Tpm4          | tropomyosin 4                                                          | 3.02 |
| 1453328_at   | 2700008G24Rik | RIKEN cDNA 2700008G24 gene                                             | 3.02 |
| 1460227_at   | Timp1         | tissue inhibitor of metalloproteinase 1                                | 3.02 |
| 1435084_at   | C730049O14Rik | RIKEN cDNA C730049O14 gene                                             | 3.01 |
| 1457451_at   | ---           | ---                                                                    | 2.99 |
| 1419132_at   | Tlr2          | toll-like receptor 2                                                   | 2.97 |
| 1419647_a_at | Ier3          | immediate early response 3                                             | 2.97 |
| 1451714_a_at | Map2k3        | mitogen activated protein kinase kinase 3                              | 2.95 |
| 1437277_x_at | Tgm2          | transglutaminase 2, C polypeptide                                      | 2.93 |
| 1427364_a_at | Odc1          | ornithine decarboxylase, structural 1                                  | 2.93 |
| 1460740_at   | Cltb ///      | clathrin, light polypeptide (Lcb) ///                                  | 2.93 |
|              | LOC100046457  | protein                                                                |      |
| 1436778_at   | Cybb          | cytochrome b-245, beta polypeptide                                     | 2.92 |
| 1450355_a_at | Capg          | capping protein (actin filament), gelsolin-like                        | 2.92 |
| 1451021_a_at | Klf5          | Kruppel-like factor 5                                                  | 2.90 |
| 1437711_x_at | EG666231 ///  | ornithine decarboxylase, structural 1 ///                              | 2.90 |
|              | EG668343 ///  | Ornithine decarboxylase (ODC) ///                                      |      |
|              | LOC546355 /// | protein ///                                                            |      |
|              | LOC627245 /// | predicted gene, EG666231 ///                                           |      |
|              | LOC632337 /// | predicted gene, EG668343                                               |      |
|              | LOC665017 /// |                                                                        |      |
|              | LOC676173 /// |                                                                        |      |
|              | Odc1          |                                                                        |      |
| 1439399_a_at | Snhg1         | small nucleolar RNA host gene (non-protein coding) 1                   | 2.90 |
| 1453287_at   | 5730557B15Rik | RIKEN cDNA 5730557B15 gene                                             | 2.90 |
| 1415899_at   | Junb          | Jun-B oncogene                                                         | 2.89 |
| 1428319_at   | Pdlim7        | PDZ and LIM domain 7                                                   | 2.89 |
| 1435644_at   | Sh3pxd2b      | SH3 and PX domains 2B                                                  | 2.88 |
| 1418240_at   | Gbp2          | guanylate nucleotide binding protein 2                                 | 2.87 |
| 1454768_at   | Kcnf1         | potassium voltage-gated channel, subfamily F, member 1                 | 2.87 |
| 1439925_at   | Tm4sf1        | transmembrane 4 superfamily member 1                                   | 2.87 |
| 1451382_at   | Chac1         | ChaC, cation transport regulator-like 1 (E. coli)                      | 2.86 |
| 1422120_at   | Eaf2          | ELL associated factor 2                                                | 2.84 |
| 1449141_at   | Fblim1        | filamin binding LIM protein 1                                          | 2.84 |
| 1417928_at   | Pdlim4        | PDZ and LIM domain 4                                                   | 2.83 |
| 1434436_at   | Morc4         | microrchidia 4                                                         | 2.83 |
| 1422818_at   | Nedd9         | neural precursor cell expressed, developmentally down-regulated gene 9 | 2.80 |
| 1452035_at   | Col4a1        | collagen, type IV, alpha 1                                             | 2.80 |
| 1416892_s_at | 3110001A13Rik | RIKEN cDNA 3110001A13 gene                                             | 2.79 |
| 1450641_at   | Vim           | vimentin                                                               | 2.79 |
| 1449184_at   | Pglyrp1       | peptidoglycan recognition protein 1                                    | 2.78 |
| 1415871_at   | Tgfb1         | transforming growth factor, beta induced                               | 2.77 |

|              |                           |                                                                                                                                    |      |
|--------------|---------------------------|------------------------------------------------------------------------------------------------------------------------------------|------|
| 1452283_at   | Rassf8                    | Ras association (RalGDS/AF-6) domain family 8                                                                                      | 2.76 |
| 1439705_at   | BB070754                  | Expressed sequence BB070754                                                                                                        | 2.76 |
| 1416184_s_at | Hmga1                     | high mobility group AT-hook 1                                                                                                      | 2.75 |
| 1424942_a_at | Myc                       | myelocytomatosis oncogene                                                                                                          | 2.75 |
| 1440621_at   | ---                       | Transcribed locus                                                                                                                  | 2.75 |
| 1450744_at   | Ell2                      | elongation factor RNA polymerase II 2                                                                                              | 2.73 |
| 1435931_at   | ---                       | 16 days neonate cerebellum cDNA, RIKEN full-length enriched library, clone:9630061A16 product:unclassifiable, full insert sequence | 2.73 |
| 1441300_at   | Kcnf1                     | potassium voltage-gated channel, subfamily F, member 1                                                                             | 2.72 |
| 1440657_at   | ---                       | ---                                                                                                                                | 2.72 |
| 1422622_at   | Nos3                      | nitric oxide synthase 3, endothelial cell                                                                                          | 2.72 |
| 1422537_a_at | Id2                       | inhibitor of DNA binding 2                                                                                                         | 2.70 |
| 1435367_at   | Mapk4                     | mitogen-activated protein kinase 4                                                                                                 | 2.69 |
| 1452803_at   | Glipr2                    | GLI pathogenesis-related 2                                                                                                         | 2.69 |
| 1416303_at   | Litaf                     | LPS-induced TN factor                                                                                                              | 2.69 |
| 1449310_at   | Ptger2                    | prostaglandin E receptor 2 (subtype EP2)                                                                                           | 2.68 |
| 1450478_a_at | Ptpn12                    | protein tyrosine phosphatase, non-receptor type 12                                                                                 | 2.68 |
| 1418250_at   | Arl4d ///<br>LOC100044157 | ADP-ribosylation factor-like 4D /// hypothetical protein LOC100044157                                                              | 2.68 |
| 1451458_at   | Tmem2                     | transmembrane protein 2                                                                                                            | 2.67 |
| 1431225_at   | Sox11                     | SRY-box containing gene 11                                                                                                         | 2.67 |
| 1455900_x_at | Tgm2                      | transglutaminase 2, C polypeptide                                                                                                  | 2.65 |
| 1419127_at   | Npy                       | neuropeptide Y                                                                                                                     | 2.65 |
| 1429759_at   | Rps6ka6                   | ribosomal protein S6 kinase polypeptide 6                                                                                          | 2.64 |
| 1449480_at   | Sap18                     | Sin3-associated polypeptide 18                                                                                                     | 2.64 |
| 1418637_at   | Etv3 ///<br>LOC100045950  | ets variant gene 3 /// similar to ets variant gene 3                                                                               | 2.64 |
| 1424751_at   | Abt1                      | activator of basal transcription                                                                                                   | 2.61 |
| 1448688_at   | Podxl                     | podocalyxin-like                                                                                                                   | 2.60 |
| 1435484_at   | Slc5a3                    | solute carrier family 5 (inositol transporters), member 3                                                                          | 2.59 |
| 1429444_at   | Rasl11a                   | RAS-like, family 11, member A                                                                                                      | 2.59 |
| 1422045_a_at | Ptpn12                    | protein tyrosine phosphatase, non-receptor type 12                                                                                 | 2.58 |
| 1434283_at   | LOC100044968              | similar to modulator recognition factor 2                                                                                          | 2.57 |
| 1452217_at   | Ahnak                     | AHNAK nucleoprotein (desmoyokin)                                                                                                   | 2.56 |
| 1452192_at   | BC053440                  | cDNA sequence BC053440                                                                                                             | 2.56 |
| 1454018_at   | Tlk2                      | tousled-like kinase 2 (Arabidopsis)                                                                                                | 2.55 |
| 1455919_at   | ---                       | Transcribed locus                                                                                                                  | 2.54 |
| 1440346_at   | Jmjd3                     | Jumonji domain containing 3                                                                                                        | 2.54 |
| 1455372_at   | Cpeb3                     | cytoplasmic polyadenylation element binding protein 3                                                                              | 2.54 |
| 1423584_at   | Igfbp7                    | insulin-like growth factor binding protein 7                                                                                       | 2.54 |
| 1437868_at   | BC023892                  | cDNA sequence BC023892                                                                                                             | 2.52 |
| 1452398_at   | Plce1                     | phospholipase C, epsilon 1                                                                                                         | 2.52 |
| 1448605_at   | Rhoc                      | ras homolog gene family, member C                                                                                                  | 2.52 |
| 1424996_at   | Cflar                     | CASP8 and FADD-like apoptosis regulator                                                                                            | 2.52 |
| 1452157_at   | Eprs ///<br>LOC633677     | glutamyl-prolyl-tRNA synthetase /// similar to Bifunctional aminoacyl-tRNA synthetase                                              | 2.51 |
| 1427893_a_at | Pmvk                      | phosphomevalonate kinase                                                                                                           | 2.51 |
| 1424440_at   | Mrps6                     | mitochondrial ribosomal protein S6                                                                                                 | 2.51 |



|              |                  |                                                                                                                                       |      |
|--------------|------------------|---------------------------------------------------------------------------------------------------------------------------------------|------|
| 1435701_at   | ---              | 13 days embryo lung cDNA, RIKEN full-length enriched library, clone:D430017B04<br>product:unclassifiable, full insert sequence        | 2.51 |
| 1424287_at   | Prkx             | protein kinase, X-linked                                                                                                              | 2.50 |
| 1460351_at   | S100a11          | S100 calcium binding protein A11 (calgizzarin)                                                                                        | 2.50 |
| 1424051_at   | Col4a2           | collagen, type IV, alpha 2                                                                                                            | 2.50 |
| 1458588_at   | ---              | ---                                                                                                                                   | 2.50 |
| 1450685_at   | Arpp19           | cAMP-regulated phosphoprotein 19                                                                                                      | 2.49 |
| 1451299_at   | Prkx             | protein kinase, X-linked                                                                                                              | 2.49 |
| 1416304_at   | Litaf            | LPS-induced TN factor                                                                                                                 | 2.47 |
| 1421392_a_at | Birc3            | baculoviral IAP repeat-containing 3                                                                                                   | 2.47 |
| 1457983_s_at | Rwdd4a           | RWD domain containing 4A                                                                                                              | 2.44 |
| 1433205_at   | 2810436B12Rik    | RIKEN cDNA 2810436B12 gene                                                                                                            | 2.43 |
| 1428114_at   | Slc14a1          | solute carrier family 14 (urea transporter), member 1                                                                                 | 2.42 |
| 1418135_at   | Aff1             | AF4/FMR2 family, member 1                                                                                                             | 2.42 |
| 1427165_at   | Il13ra1          | interleukin 13 receptor, alpha 1                                                                                                      | 2.41 |
| 1437451_at   | 1110006O17Rik    | RIKEN cDNA 1110006O17 gene                                                                                                            | 2.41 |
| 1437166_at   | Tinf2            | Terf1 (TRF1)-interacting nuclear factor 2                                                                                             | 2.41 |
| 1417562_at   | Eif4ebp1         | eukaryotic translation initiation factor 4E binding protein 1                                                                         | 2.41 |
| 1456381_x_at | Mcl1             | myeloid cell leukemia sequence 1                                                                                                      | 2.40 |
| 1424271_at   | Dclk1            | doublecortin-like kinase 1                                                                                                            | 2.40 |
| 1416880_at   | Mcl1             | myeloid cell leukemia sequence 1                                                                                                      | 2.39 |
| 1438408_at   | Ankrd56          | ankyrin repeat domain 56                                                                                                              | 2.39 |
| 1421228_at   | Ccl7             | chemokine (C-C motif) ligand 7                                                                                                        | 2.38 |
| 1456292_a_at | Vim              | vimentin                                                                                                                              | 2.37 |
| 1449485_at   | Ripk1            | receptor (TNFRSF)-interacting serine-threonine kinase 1                                                                               | 2.36 |
| 1449164_at   | Cd68             | CD68 antigen                                                                                                                          | 2.36 |
| 1430064_at   | Ttll11           | tubulin tyrosine ligase-like family, member 11                                                                                        | 2.36 |
| 1460208_at   | Fbn1             | fibrillin 1                                                                                                                           | 2.35 |
| 1418719_at   | 2410004L22Rik    | RIKEN cDNA 2410004L22 gene                                                                                                            | 2.35 |
| 1416286_at   | Rgs4             | regulator of G-protein signaling 4                                                                                                    | 2.35 |
| 1417291_at   | Tnfrsf1a         | tumor necrosis factor receptor superfamily, member 1a                                                                                 | 2.35 |
| 1448170_at   | Siah2            | seven in absentia 2                                                                                                                   | 2.35 |
| 1417612_at   | Ier5             | immediate early response 5                                                                                                            | 2.35 |
| 1426870_at   | Fbxo33           | F-box protein 33                                                                                                                      | 2.34 |
| 1421654_a_at | Lmna             | lamin A                                                                                                                               | 2.34 |
| 1416064_a_at | Hspa5            | heat shock protein 5                                                                                                                  | 2.33 |
| 1433748_at   | LOC100046487 /// | zinc finger, DHHC domain containing 18 ///                                                                                            | 2.32 |
|              | Zdhhc18          | to ribosomal protein L29                                                                                                              |      |
| 1460694_s_at | Svil             | supervillin                                                                                                                           | 2.32 |
| 1416226_at   | Arpc1b           | actin related protein 2/3 complex, subunit 1B                                                                                         | 2.31 |
| 1436338_at   | ---              | Adult male olfactory brain cDNA, RIKEN full-length enriched library, clone:6430546G07<br>product:unclassifiable, full insert sequence | 2.31 |
| 1424065_at   | Edem1            | ER degradation enhancer, mannosidase alpha-like 1                                                                                     | 2.30 |
| 1455994_x_at | Elovl1           | elongation of very long chain fatty acids (FEN1/Elo2, SUR4/Elo3, yeast)-like 1                                                        | 2.29 |
| 1424244_at   | Rwdd4a           | RWD domain containing 4A                                                                                                              | 2.28 |
| 1451201_s_at | Rnh1             | ribonuclease/angiogenin inhibitor 1                                                                                                   | 2.27 |
| 1428942_at   | Mt2              | metallothionein 2                                                                                                                     | 2.27 |
| 1422697_s_at | Jarid2           | jumonji, AT rich interactive domain 2                                                                                                 | 2.27 |

|              |                   |                                                                                    |      |
|--------------|-------------------|------------------------------------------------------------------------------------|------|
| 1452358_at   | Rai2              | retinoic acid induced 2                                                            | 2.27 |
| 1421756_a_at | Gpr19             | G protein-coupled receptor 19                                                      | 2.27 |
| 1433555_at   | Eaf1              | ELL associated factor 1                                                            | 2.27 |
| 1435526_at   | Tor1aip2          | torsin A interacting protein 2                                                     | 2.27 |
| 1417352_s_at | Snrpa1            | small nuclear ribonucleoprotein polypeptide A'                                     | 2.26 |
| 1416554_at   | LOC100048338 ///  | PDZ and LIM domain 1 (elfin) ///                                                   | 2.26 |
|              | Pdlim1            | protein                                                                            |      |
| 1460330_at   | Anxa3             | annexin A3                                                                         | 2.26 |
| 1420502_at   | Sat1              | spermidine/spermine N1-acetyl transferase 1                                        | 2.25 |
| 1435402_at   | Gramd1b           | GRAM domain containing 1B                                                          | 2.24 |
| 1425503_at   | Gcnt2             | glucosaminyl (N-acetyl) transferase 2, I-branching enzyme                          | 2.23 |
| 1454268_a_at | Cyba              | cytochrome b-245, alpha polypeptide                                                | 2.23 |
| 1429863_at   | Lonrf3            | LON peptidase N-terminal domain and ring finger 3                                  | 2.23 |
| 1415802_at   | Slc16a1           | solute carrier family 16 (monocarboxylic acid transporters), member 1              | 2.22 |
| 1419047_at   | Pcnx              | pecanex homolog (Drosophila)                                                       | 2.22 |
| 1420905_at   | Il17ra            | interleukin 17 receptor A                                                          | 2.21 |
| 1422473_at   | Pde4b             | phosphodiesterase 4B, cAMP specific                                                | 2.21 |
| 1448596_at   | Slc6a8            | solute carrier family 6 (neurotransmitter transporter, creatine), member 8         | 2.21 |
| 1422506_a_at | Cstb              | cystatin B                                                                         | 2.20 |
| 1460632_at   | ---               | Transcribed locus                                                                  | 2.20 |
| 1417185_at   | Ly6a              | lymphocyte antigen 6 complex, locus A                                              | 2.20 |
| 1418296_at   | Fxyd5             | FXYP domain-containing ion transport regulator 5                                   | 2.20 |
| 1429564_at   | LOC100048247 ///  | polycomb group ring finger 5 ///                                                   | 2.19 |
|              | Pcgf5             | polycomb group ring finger 5                                                       |      |
| 1417868_a_at | Ctsz              | cathepsin Z                                                                        | 2.19 |
| 1453059_at   | 2310046A06Rik     | RIKEN cDNA 2310046A06 gene                                                         | 2.19 |
| 1417483_at   | Nfkbiz            | nuclear factor of kappa light polypeptide gene enhancer in B-cells inhibitor, zeta | 2.19 |
| 1430353_at   | Glis3             | GLIS family zinc finger 3                                                          | 2.19 |
| 1455200_at   | Pak6              | p21 (CDKN1A)-activated kinase 6                                                    | 2.18 |
| 1431073_at   | Ptar1             | protein prenyltransferase alpha subunit repeat containing 1                        | 2.18 |
| 1433582_at   | 1190002N15Rik /// | RIKEN cDNA 1190002N15 gene ///                                                     | 2.18 |
|              | LOC100044725      | protein LOC100044725                                                               |      |
| 1426529_a_at | Tagln2            | transgelin 2                                                                       | 2.18 |
| 1446860_at   | ---               | ---                                                                                | 2.18 |
| 1449901_a_at | Map3k6            | mitogen-activated protein kinase kinase kinase 6                                   | 2.18 |
| 1449119_at   | Arih2             | ariadne homolog 2 (Drosophila)                                                     | 2.18 |
| 1416543_at   | Nfe2l2            | nuclear factor, erythroid derived 2, like 2                                        | 2.17 |
| 1424594_at   | Lgals7            | lectin, galactose binding, soluble 7                                               | 2.15 |
| 1419444_at   | LOC100041953 ///  | Sin3-associated polypeptide 18 ///                                                 | 2.15 |
|              | LOC100047209 ///  | SAP18                                                                              |      |
|              | Sap18             |                                                                                    |      |
| 1423233_at   | Cebpd             | CCAAT/enhancer binding protein (C/EBP), delta                                      | 2.15 |
| 1416458_at   | Arf2              | ADP-ribosylation factor 2                                                          | 2.14 |
| 1437658_a_at | Snhg1             | small nucleolar RNA host gene (non-protein coding) 1                               | 2.13 |

|              |                                               |                                                                                                                                        |      |
|--------------|-----------------------------------------------|----------------------------------------------------------------------------------------------------------------------------------------|------|
| 1441823_at   | Zmiz1                                         | zinc finger, MIZ-type containing 1                                                                                                     | 2.13 |
| 1447585_s_at | Mrps6                                         | mitochondrial ribosomal protein S6                                                                                                     | 2.13 |
| 1435926_at   | Chml                                          | choroideremia-like                                                                                                                     | 2.13 |
| 1435803_a_at | Eif4e2                                        | eukaryotic translation initiation factor 4E member 2                                                                                   | 2.13 |
| 1436325_at   | Rora                                          | RAR-related orphan receptor alpha                                                                                                      | 2.13 |
| 1426724_at   | Cnn3 ///<br>LOC100047856                      | calponin 3, acidic /// similar to calponin 3, acidic                                                                                   | 2.13 |
| 1449145_a_at | Cav1                                          | caveolin, caveolae protein 1                                                                                                           | 2.12 |
| 1416101_a_at | Hist1h1c                                      | histone cluster 1, H1c                                                                                                                 | 2.12 |
| 1418031_at   | Myo9b                                         | myosin IXb                                                                                                                             | 2.12 |
| 1418105_at   | Stmn4                                         | stathmin-like 4                                                                                                                        | 2.12 |
| 1448694_at   | Jun                                           | Jun oncogene                                                                                                                           | 2.12 |
| 1439862_at   | Rorb                                          | RAR-related orphan receptor beta                                                                                                       | 2.12 |
| 1425803_a_at | Mbd2                                          | methyl-CpG binding domain protein 2                                                                                                    | 2.12 |
| 1415910_s_at | Ciapin1                                       | cytokine induced apoptosis inhibitor 1                                                                                                 | 2.12 |
| 1456014_s_at | Fermt3                                        | fermitin family homolog 3 (Drosophila)                                                                                                 | 2.11 |
| 1452783_at   | Fndc3b                                        | fibronectin type III domain containing 3B                                                                                              | 2.11 |
| 1460735_at   | Svil                                          | supervillin                                                                                                                            | 2.11 |
| 1420172_at   | ---                                           | ---                                                                                                                                    | 2.11 |
| 1418835_at   | Phlda1                                        | pleckstrin homology-like domain, family A, member 1                                                                                    | 2.11 |
| 1455944_at   | Zfp516                                        | zinc finger protein 516                                                                                                                | 2.11 |
| 1460700_at   | Stat3                                         | signal transducer and activator of transcription 3                                                                                     | 2.10 |
| 1449389_at   | Tal1                                          | T-cell acute lymphocytic leukemia 1                                                                                                    | 2.10 |
| 1416459_at   | Arf2                                          | ADP-ribosylation factor 2                                                                                                              | 2.10 |
| 1435636_at   | 2310051F07Rik                                 | RIKEN cDNA 2310051F07 gene                                                                                                             | 2.10 |
| 1416435_at   | Ltbr                                          | lymphotoxin B receptor                                                                                                                 | 2.09 |
| 1422573_at   | Ampd3                                         | AMP deaminase 3                                                                                                                        | 2.09 |
| 1434646_s_at | LOC100041953 ///<br>LOC100047209 ///<br>Sap18 | Sin3-associated polypeptide 18 /// similar to SAP18                                                                                    | 2.08 |
| 1419445_s_at | LOC100041953 ///<br>LOC100047209 ///<br>Sap18 | Sin3-associated polypeptide 18 /// similar to SAP18                                                                                    | 2.07 |
| 1431339_a_at | Efhd2 ///<br>LOC100048188                     | EF hand domain containing 2 /// similar to EF hand domain containing 2                                                                 | 2.07 |
| 1433696_at   | Hn1l                                          | hematological and neurological expressed 1-like                                                                                        | 2.07 |
| 1451121_a_at | Gltscr2                                       | glioma tumor suppressor candidate region gene 2                                                                                        | 2.06 |
| 1444188_at   | ---                                           | ---                                                                                                                                    | 2.06 |
| 1448306_at   | Nfkbia                                        | nuclear factor of kappa light chain gene enhancer in B-cells inhibitor, alpha                                                          | 2.06 |
| 1444180_at   | ---                                           | 12 days embryo spinal ganglion cDNA, RIKEN full-length enriched library, clone:D130055E11 product:unclassifiable, full insert sequence | 2.05 |
| 1425053_at   | Isoc1                                         | isochorismatase domain containing 1                                                                                                    | 2.05 |
| 1422507_at   | Cstb                                          | cystatin B                                                                                                                             | 2.05 |
| 1430089_at   | 5830469G19Rik                                 | RIKEN cDNA 5830469G19 gene                                                                                                             | 2.04 |
| 1425305_at   | Zfp295                                        | zinc finger protein 295                                                                                                                | 2.04 |
| 1417869_s_at | Ctsz                                          | cathepsin Z                                                                                                                            | 2.04 |
| 1437766_at   | ---                                           | ---                                                                                                                                    | 2.03 |

|              |                          |                                                                                                                        |       |
|--------------|--------------------------|------------------------------------------------------------------------------------------------------------------------|-------|
| 1422615_at   | Map4k4                   | mitogen-activated protein kinase kinase kinase kinase 4                                                                | 2.03  |
| 1441437_at   | ---                      | ---                                                                                                                    | 2.03  |
| 1441578_at   | Ccdc86                   | coiled-coil domain containing 86                                                                                       | 2.03  |
| 1451208_at   | Etf1                     | eukaryotic translation termination factor 1                                                                            | 2.02  |
| 1431065_at   | Eaf1                     | ELL associated factor 1                                                                                                | 2.02  |
| 1448935_at   | Cdyl                     | chromodomain protein, Y chromosome-like                                                                                | 2.02  |
| 1417621_at   | Nfatc1                   | nuclear factor of activated T-cells, cytoplasmic, calcineurin-dependent 1                                              | 2.01  |
| 1448419_at   | Pop4                     | processing of precursor 4, ribonuclease P/MRP family, ( <i>S. cerevisiae</i> )                                         | 2.01  |
| 1436100_at   | Sh2d5                    | SH2 domain containing 5                                                                                                | 2.01  |
| 1460239_at   | Tspan13                  | tetraspanin 13                                                                                                         | -2.00 |
| 1439975_at   | BC062109                 | cDNA sequence BC062109                                                                                                 | -2.00 |
| 1434140_at   | Mcf2l                    | mcf.2 transforming sequence-like                                                                                       | -2.00 |
| 1435612_at   | Opcml                    | opioid binding protein/cell adhesion molecule-like                                                                     | -2.00 |
| 1456137_at   | Nrxn3                    | neurexin III                                                                                                           | -2.00 |
| 1450449_a_at | Rilpl1                   | Rab interacting lysosomal protein-like 1                                                                               | -2.00 |
| 1433642_at   | Arl15                    | ADP-ribosylation factor-like 15                                                                                        | -2.01 |
| 1431598_a_at | Lhx9                     | LIM homeobox protein 9                                                                                                 | -2.01 |
| 1435993_at   | OTTMUSG00000000421       | predicted gene, OTTMUSG00000000421                                                                                     | -2.01 |
| 1436754_at   | LOC100047659 /// Tmem179 | transmembrane protein 179 /// hypothetical protein LOC100047659                                                        | -2.01 |
| 1418185_at   | 4733401H18Rik            | RIKEN cDNA 4733401H18 gene                                                                                             | -2.01 |
| 1434655_at   | Foxk1                    | forkhead box K1                                                                                                        | -2.01 |
| 1440455_at   | AI848599                 | expressed sequence AI848599                                                                                            | -2.01 |
| 1460081_at   | Syt7                     | Synaptotagmin VII                                                                                                      | -2.01 |
| 1457213_a_at | Dgkh                     | diacylglycerol kinase, eta                                                                                             | -2.01 |
| 1435239_at   | Gria1                    | glutamate receptor, ionotropic, AMPA1 (alpha 1)                                                                        | -2.01 |
| 1427186_a_at | LOC100047837             | similar to Myocyte enhancer factor 2A                                                                                  | -2.01 |
| 1437774_at   | 1700020I14Rik            | RIKEN cDNA 1700020I14 gene                                                                                             | -2.01 |
| 1440928_at   | D630037F22Rik            | RIKEN cDNA D630037F22 gene                                                                                             | -2.02 |
| 1435845_at   | ---                      | B16 F10Y cells cDNA, RIKEN full-length enriched library, clone:G370036C05 product:unclassifiable, full insert sequence | -2.02 |
| 1425833_a_at | Hpca                     | hippocalcin                                                                                                            | -2.02 |
| 1421074_at   | Cyp7b1                   | cytochrome P450, family 7, subfamily b, polypeptide 1                                                                  | -2.02 |
| 1424474_a_at | Camkk2                   | calcium/calmodulin-dependent protein kinase kinase 2, beta                                                             | -2.02 |
| 1457671_at   | 9330120H11Rik            | RIKEN cDNA 9330120H11 gene                                                                                             | -2.02 |
| 1454821_at   | B3gat1                   | beta-1,3-glucuronyltransferase 1 (glucuronosyltransferase P)                                                           | -2.02 |
| 1449298_a_at | Pde1a                    | phosphodiesterase 1A, calmodulin-dependent                                                                             | -2.03 |
| 1443379_at   | LOC100048446             | similar to RIKEN cDNA A430033K04 gene                                                                                  | -2.03 |
| 1433751_at   | Slc39a10                 | solute carrier family 39 (zinc transporter), member 10                                                                 | -2.03 |
| 1439610_at   | Rab27b                   | RAB27b, member RAS oncogene family                                                                                     | -2.03 |
| 1434645_at   | C530008M17Rik            | RIKEN cDNA C530008M17 gene                                                                                             | -2.03 |
| 1418743_a_at | LOC100047138 /// Tesc    | tescalcin /// similar to Tescalcin                                                                                     | -2.03 |
| 1417181_a_at | Kifap3                   | kinesin-associated protein 3                                                                                           | -2.03 |
| 1460675_at   | Igsf8                    | immunoglobulin superfamily, member 8                                                                                   | -2.03 |

|              |                    |                                                                                                                                         |       |
|--------------|--------------------|-----------------------------------------------------------------------------------------------------------------------------------------|-------|
| 1455868_a_at | Tubgcp2            | tubulin, gamma complex associated protein 2                                                                                             | -2.03 |
| 1438580_at   | Zcchc7             | zinc finger, CCHC domain containing 7                                                                                                   | -2.03 |
| 1421928_at   | Epha4              | Eph receptor A4                                                                                                                         | -2.04 |
| 1429215_at   | 2310058N22Rik      | RIKEN cDNA 2310058N22 gene                                                                                                              | -2.04 |
| 1446382_at   | ---                | 0 day neonate cerebellum cDNA, RIKEN full-length enriched library, clone:C230094E06 product:unclassifiable, full insert sequence        | -2.04 |
| 1456423_at   | Mbd5               | methyl-CpG binding domain protein 5                                                                                                     | -2.04 |
| 1455194_at   | Mapk8ip2           | mitogen-activated protein kinase 8 interacting protein 2                                                                                | -2.04 |
| 1421862_a_at | Vamp1              | vesicle-associated membrane protein 1                                                                                                   | -2.04 |
| 1460570_at   | Pgbd5              | piggyBac transposable element derived 5                                                                                                 | -2.05 |
| 1422126_a_at | Nudt13             | nudix (nucleoside diphosphate linked moiety X)-type motif 13                                                                            | -2.05 |
| 1448676_at   | Camk2b             | calcium/calmodulin-dependent protein kinase II, beta                                                                                    | -2.05 |
| 1428240_at   | Nrxn1              | neurexin I                                                                                                                              | -2.05 |
| 1428647_at   | LOC676870 /// Pbx1 | pre B-cell leukemia transcription factor 1 /// region containing RIKEN cDNA 2310056B04 gene; pre B-cell leukemia transcription factor 1 | -2.05 |
| 1434295_at   | Rasgrp1            | RAS guanyl releasing protein 1                                                                                                          | -2.05 |
| 1427349_x_at | 2810021G02Rik      | RIKEN cDNA 2810021G02 gene                                                                                                              | -2.05 |
| 1428748_at   | 5830428H23Rik      | RIKEN cDNA 5830428H23 gene                                                                                                              | -2.05 |
| 1451094_at   | Ggtl3              | gamma-glutamyltransferase-like 3                                                                                                        | -2.05 |
| 1435767_at   | Scn3b              | sodium channel, voltage-gated, type III, beta                                                                                           | -2.05 |
| 1445766_at   | ---                | ---                                                                                                                                     | -2.05 |
| 1433602_at   | Gabra5             | gamma-aminobutyric acid (GABA-A) receptor, subunit alpha 5                                                                              | -2.06 |
| 1419664_at   | Srr                | serine racemase                                                                                                                         | -2.06 |
| 1418400_at   | Larp6              | La ribonucleoprotein domain family, member 6                                                                                            | -2.06 |
| 1435842_at   | Nat8l              | N-acetyltransferase 8-like                                                                                                              | -2.07 |
| 1425514_at   | Pik3r1             | phosphatidylinositol 3-kinase, regulatory subunit, polypeptide 1 (p85 alpha)                                                            | -2.07 |
| 1424415_s_at | Spon1              | spondin 1, (f-spondin) extracellular matrix protein                                                                                     | -2.07 |
| 1444046_at   | D430041B17Rik      | RIKEN cDNA D430041B17 gene                                                                                                              | -2.07 |
| 1441815_at   | AI851453           | expressed sequence AI851453                                                                                                             | -2.07 |
| 1416023_at   | Fabp3              | fatty acid binding protein 3, muscle and heart                                                                                          | -2.07 |
| 1450123_at   | Ryr2               | ryanodine receptor 2, cardiac                                                                                                           | -2.07 |
| 1452353_at   | Gpr155             | G protein-coupled receptor 155                                                                                                          | -2.07 |
| 1455526_at   | Diras1             | DIRAS family, GTP-binding RAS-like 1                                                                                                    | -2.08 |
| 1441967_at   | Pddc1              | Parkinson disease 7 domain containing 1                                                                                                 | -2.08 |
| 1434497_at   | 4933431E20Rik      | RIKEN cDNA 4933431E20 gene                                                                                                              | -2.08 |
| 1427012_at   | Lancl1             | LanC (bacterial lantibiotic synthetase component C)-like 1                                                                              | -2.08 |
| 1434531_at   | Mgat5b             | mannoside acetylglucosaminyltransferase 5, isoenzyme B                                                                                  | -2.08 |
| 1457137_at   | ---                | Transcribed locus                                                                                                                       | -2.08 |
| 1438473_at   | Arl15              | ADP-ribosylation factor-like 15                                                                                                         | -2.08 |
| 1445676_at   | ---                | 0 day neonate cerebellum cDNA, RIKEN full-length enriched library, clone:C230043A04 product:unclassifiable, full insert sequence        | -2.09 |
| 1427754_a_at | Dnm1               | dynamamin 1                                                                                                                             | -2.09 |
| 1434956_at   | Rnf170             | ring finger protein 170                                                                                                                 | -2.09 |
| 1421446_at   | Prkcc              | protein kinase C, gamma                                                                                                                 | -2.09 |
| 1429189_at   | Arsb               | arylsulfatase B                                                                                                                         | -2.09 |

|              |               |                                                                                                                                        |       |
|--------------|---------------|----------------------------------------------------------------------------------------------------------------------------------------|-------|
| 1424464_s_at | 2210010L05Rik | RIKEN cDNA 2210010L05 gene                                                                                                             | -2.09 |
| 1442786_s_at | Rufy3         | RUN and FYVE domain containing 3                                                                                                       | -2.09 |
| 1435796_at   | ---           | ---                                                                                                                                    | -2.09 |
| 1450202_at   | Grin1         | glutamate receptor, ionotropic, NMDA1 (zeta 1)                                                                                         | -2.10 |
| 1436450_at   | D11Bwg0517e   | DNA segment, Chr 11, Brigham & Women's Genetics 0517 expressed                                                                         | -2.10 |
| 1415698_at   | Golm1         | golgi membrane protein 1                                                                                                               | -2.10 |
| 1441768_at   | 9430051O21Rik | RIKEN cDNA 9430051O21 gene                                                                                                             | -2.10 |
| 1449468_at   | St6galnac5    | ST6 (alpha-N-acetyl-neuraminy-2,3-beta-galactosyl-1,3)-N-acetylgalactosaminide alpha-2,6-sialyltransferase 5                           | -2.10 |
| 1452050_at   | Camk1d        | calcium/calmodulin-dependent protein kinase ID                                                                                         | -2.10 |
| 1428447_at   | Tmem14a       | transmembrane protein 14A                                                                                                              | -2.11 |
| 1438635_x_at | B930041F14Rik | RIKEN cDNA B930041F14 gene                                                                                                             | -2.11 |
| 1454926_at   | Sphkap        | SPHK1 interactor, AKAP domain containing                                                                                               | -2.11 |
| 1440630_at   | ---           | Adult male olfactory brain cDNA, RIKEN full-length enriched library, clone:6430514A06 product:unclassifiable, full insert sequence     | -2.11 |
| 1438417_at   | Pwwp2b        | PWWP domain containing 2B                                                                                                              | -2.12 |
| 1418746_at   | Pnkd          | paroxysmal nonkinesigenic dyskinesia                                                                                                   | -2.12 |
| 1457324_at   | ---           | Transcribed locus                                                                                                                      | -2.12 |
| 1433577_at   | A730017C20Rik | RIKEN cDNA A730017C20 gene                                                                                                             | -2.12 |
| 1428669_at   | Bmyc          | brain expressed myelocytomatosis oncogene                                                                                              | -2.12 |
| 1440343_at   | Rps6ka5       | ribosomal protein S6 kinase, polypeptide 5                                                                                             | -2.12 |
| 1433596_at   | Dnajc6        | DnaJ (Hsp40) homolog, subfamily C, member 6                                                                                            | -2.12 |
| 1445837_at   | ---           | 12 days embryo spinal ganglion cDNA, RIKEN full-length enriched library, clone:D130073P12 product:unclassifiable, full insert sequence | -2.12 |
| 1442393_at   | ---           | ---                                                                                                                                    | -2.12 |
| 1435260_at   | ---           | ---                                                                                                                                    | -2.13 |
| 1434062_at   | Rabgap1l      | RAB GTPase activating protein 1-like                                                                                                   | -2.13 |
| 1448063_at   | Iqsec2        | IQ motif and Sec7 domain 2                                                                                                             | -2.13 |
| 1444008_at   | LOC100039284  | similar to TBP-associated factor 4                                                                                                     | -2.13 |
| 1452848_at   | Tmem181       | transmembrane protein 181                                                                                                              | -2.13 |
| 1429071_at   | Me3           | malic enzyme 3, NADP(+)-dependent, mitochondrial                                                                                       | -2.14 |
| 1428813_a_at | Drd1ip        | dopamine receptor D1 interacting protein                                                                                               | -2.14 |
| 1452958_at   | Asphd2        | aspartate beta-hydroxylase domain containing 2                                                                                         | -2.14 |
| 1417664_a_at | Ndr3          | N-myc downstream regulated gene 3                                                                                                      | -2.14 |
| 1453253_a_at | Rpusd1        | RNA pseudouridylate synthase domain containing 1                                                                                       | -2.14 |
| 1439042_at   | Adcyap1r1     | adenylate cyclase activating polypeptide 1 receptor 1                                                                                  | -2.14 |
| 1428156_at   | Gng2          | guanine nucleotide binding protein (G protein), gamma 2 subunit                                                                        | -2.15 |
| 1424403_a_at | Rufy3         | RUN and FYVE domain containing 3                                                                                                       | -2.16 |
| 1434763_at   | Orai2         | ORAI calcium release-activated calcium modulator 2                                                                                     | -2.16 |
| 1452825_at   | Tmem59l       | transmembrane protein 59-like                                                                                                          | -2.16 |
| 1452251_at   | Nbea          | neurobeachin                                                                                                                           | -2.16 |
| 1453468_at   | 4930430F08Rik | RIKEN cDNA 4930430F08 gene                                                                                                             | -2.16 |
| 1455272_at   | Grm5          | glutamate receptor, metabotropic 5                                                                                                     | -2.16 |

|              |               |                                                                                                                                                      |       |
|--------------|---------------|------------------------------------------------------------------------------------------------------------------------------------------------------|-------|
| 1420876_a_at | 6-Sep         | septin 6                                                                                                                                             | -2.16 |
| 1436548_at   | 1810012P15Rik | RIKEN cDNA 1810012P15 gene                                                                                                                           | -2.16 |
| 1422955_at   | Syt17         | synaptotagmin XVII                                                                                                                                   | -2.17 |
| 1447211_at   | Nrip1         | nuclear receptor interacting protein 1                                                                                                               | -2.17 |
| 1452763_at   | Nipa1         | non imprinted in Prader-Willi/Angelman syndrome<br>1 homolog (human)                                                                                 | -2.17 |
| 1419978_s_at | D10Ert610e    | DNA segment, Chr 10, ERATO Doi 610,<br>expressed                                                                                                     | -2.17 |
| 1457284_at   | ---           | CDNA clone IMAGE:5256843                                                                                                                             | -2.17 |
| 1435961_at   | Nat14         | N-acetyltransferase 14                                                                                                                               | -2.18 |
| 1422197_at   | Kcna2         | potassium voltage-gated channel, shaker-related<br>subfamily, member 2                                                                               | -2.18 |
| 1449563_at   | Cntn1         | contactin 1                                                                                                                                          | -2.19 |
| 1435501_at   | Atg2b         | ATG2 autophagy related 2 homolog B (S.<br>cerevisiae)                                                                                                | -2.19 |
| 1429113_at   | 1500031I19Rik | RIKEN cDNA 1500031I19 gene                                                                                                                           | -2.19 |
| 1439086_at   | A930009L07Rik | RIKEN cDNA A930009L07 gene                                                                                                                           | -2.19 |
| 1459107_at   | Kcnh3         | potassium voltage-gated channel, subfamily H<br>(eag-related), member 3                                                                              | -2.19 |
| 1441936_x_at | 4930447M23Rik | RIKEN cDNA 4930447M23 gene                                                                                                                           | -2.19 |
| 1428525_at   | 4930488B01Rik | RIKEN cDNA 4930488B01 gene                                                                                                                           | -2.20 |
| 1426616_at   | Tlcd1         | TLC domain containing 1                                                                                                                              | -2.20 |
| 1452938_at   | Anks1b        | ankyrin repeat and sterile alpha motif domain<br>containing 1B                                                                                       | -2.20 |
| 1434445_at   | D15Wsu169e    | DNA segment, Chr 15, Wayne State University<br>169, expressed                                                                                        | -2.20 |
| 1457423_at   | LOC675405 /// | sodium leak channel, non-selective ///<br>voltage gated channel like 1                                                                               | -2.20 |
| 1443205_at   | D5Buc30e      | DNA segment, Chr 5, Bucan 30 expressed                                                                                                               | -2.21 |
| 1452973_at   | Ppm1k         | protein phosphatase 1K (PP2C domain<br>containing)                                                                                                   | -2.21 |
| 1424037_at   | Itpka         | inositol 1,4,5-trisphosphate 3-kinase A                                                                                                              | -2.21 |
| 1438730_at   | BC028801      | cDNA sequence BC028801                                                                                                                               | -2.22 |
| 1460101_at   | ---           | ---                                                                                                                                                  | -2.22 |
| 1457077_at   | ---           | 2 days neonate sympathetic ganglion cDNA,<br>RIKEN full-length enriched library,<br>clone:7120457A19 product:unclassifiable, full<br>insert sequence | -2.22 |
| 1434653_at   | Ptk2b         | PTK2 protein tyrosine kinase 2 beta                                                                                                                  | -2.22 |
| 1439616_at   | ---           | Transcribed locus                                                                                                                                    | -2.22 |
| 1427951_s_at | Ccdc28a ///   | coiled-coil domain containing 28A ///<br>coiled-coil domain containing 28A                                                                           | -2.23 |
| 1435668_at   | 4932442K08Rik | RIKEN cDNA 4932442K08 gene                                                                                                                           | -2.23 |
| 1423559_at   | Kcnc1         | potassium voltage gated channel, Shaw-related<br>subfamily, member 1                                                                                 | -2.23 |
| 1452056_s_at | Ppp3ca        | protein phosphatase 3, catalytic subunit, alpha<br>isoform                                                                                           | -2.23 |
| 1451569_at   | Nr2c2         | nuclear receptor subfamily 2, group C, member 2                                                                                                      | -2.23 |
| 1460403_at   | Psip1         | PC4 and SFRS1 interacting protein 1                                                                                                                  | -2.23 |
| 1443824_s_at | Car7          | carbonic anhydrase 7                                                                                                                                 | -2.23 |
| 1435134_at   | Aadacl1       | arylacetamide deacetylase-like 1                                                                                                                     | -2.23 |
| 1457223_at   | ---           | ---                                                                                                                                                  | -2.24 |
| 1435095_at   | C030009O12Rik | RIKEN cDNA C030009O12 gene                                                                                                                           | -2.24 |
| 1435404_at   | Disp2         | dispatched homolog 2 (Drosophila)                                                                                                                    | -2.24 |
| 1459051_at   | 6530418L21Rik | RIKEN cDNA 6530418L21 gene                                                                                                                           | -2.24 |

|              |                                   |                                                                                                                                      |       |
|--------------|-----------------------------------|--------------------------------------------------------------------------------------------------------------------------------------|-------|
| 1434298_at   | Zeb2                              | zinc finger E-box binding homeobox 2                                                                                                 | -2.25 |
| 1452876_x_at | 2610044O15Rik ///<br>LOC100044296 | RIKEN cDNA 2610044O15 gene /// hypothetical<br>protein LOC100044296                                                                  | -2.25 |
| 1453734_at   | Atrx                              | alpha thalassemia/mental retardation syndrome X-<br>linked homolog (human)                                                           | -2.25 |
| 1421075_s_at | Cyp7b1                            | cytochrome P450, family 7, subfamily b,<br>polypeptide 1                                                                             | -2.25 |
| 1440056_at   | ---                               | Adult male hippocampus cDNA, RIKEN full-length<br>enriched library, clone:C630001C05<br>product:unclassifiable, full insert sequence | -2.25 |
| 1455410_at   | Faim2                             | Fas apoptotic inhibitory molecule 2                                                                                                  | -2.25 |
| 1433787_at   | Nell1                             | NEL-like 1 (chicken)                                                                                                                 | -2.26 |
| 1436875_at   | Dnm3                              | dynamamin 3                                                                                                                          | -2.26 |
| 1433040_at   | 2900018E21Rik                     | RIKEN cDNA 2900018E21 gene                                                                                                           | -2.26 |
| 1435417_at   | AI464131                          | expressed sequence AI464131                                                                                                          | -2.26 |
| 1443744_at   | ---                               | Transcribed locus                                                                                                                    | -2.26 |
| 1429201_at   | Cyld                              | cylindromatosis (turban tumor syndrome)                                                                                              | -2.26 |
| 1419324_at   | Lhx9                              | LIM homeobox protein 9                                                                                                               | -2.26 |
| 1426339_at   | Ak5                               | adenylate kinase 5                                                                                                                   | -2.26 |
| 1420872_at   | Gucy1b3                           | guanylate cyclase 1, soluble, beta 3                                                                                                 | -2.26 |
| 1420545_a_at | Chn1                              | chimerin (chimaerin) 1                                                                                                               | -2.26 |
| 1435933_at   | Scn2a1                            | sodium channel, voltage-gated, type II, alpha 1                                                                                      | -2.27 |
| 1419200_at   | Fxyd7                             | FXYP domain-containing ion transport regulator 7                                                                                     | -2.27 |
| 1449634_a_at | Anks1b                            | ankyrin repeat and sterile alpha motif domain<br>containing 1B                                                                       | -2.27 |
| 1416586_at   | Zfp239                            | zinc finger protein 239                                                                                                              | -2.27 |
| 1417653_at   | Pvalb                             | parvalbumin                                                                                                                          | -2.27 |
| 1428568_at   | B230217C12Rik                     | RIKEN cDNA B230217C12 gene                                                                                                           | -2.28 |
| 1425580_a_at | Pik3c3                            | phosphoinositide-3-kinase, class 3                                                                                                   | -2.28 |
| 1428375_at   | 4932415G12Rik                     | RIKEN cDNA 4932415G12 gene                                                                                                           | -2.28 |
| 1449620_s_at | D16Wsu65e                         | DNA segment, Chr 16, Wayne State University<br>65, expressed                                                                         | -2.28 |
| 1452346_at   | B3gnt1                            | UDP-GlcNAc:betaGal beta-1,3-N-<br>acetylglucosaminyltransferase 1                                                                    | -2.28 |
| 1455647_at   | Ar                                | androgen receptor                                                                                                                    | -2.28 |
| 1431751_a_at | Mpped2                            | metallophosphoesterase domain containing 2                                                                                           | -2.29 |
| 1442614_at   | Il1rap                            | interleukin 1 receptor accessory protein                                                                                             | -2.29 |
| 1441069_at   | Zdhhc23                           | zinc finger, DHHC domain containing 23                                                                                               | -2.29 |
| 1456357_at   | A930041I02Rik                     | RIKEN cDNA A930041I02 gene                                                                                                           | -2.29 |
| 1454782_at   | Bai3                              | brain-specific angiogenesis inhibitor 3                                                                                              | -2.30 |
| 1428207_at   | Bcl7a                             | B-cell CLL/lymphoma 7A                                                                                                               | -2.30 |
| 1440376_at   | Fbxo41                            | F-box protein 41                                                                                                                     | -2.30 |
| 1429104_at   | Limd2                             | LIM domain containing 2                                                                                                              | -2.30 |
| 1452474_a_at | Art3                              | ADP-ribosyltransferase 3                                                                                                             | -2.30 |
| 1438641_x_at | 1500016O10Rik                     | RIKEN cDNA 1500016O10 gene                                                                                                           | -2.30 |
| 1419401_at   | Asb13                             | ankyrin repeat and SOCS box-containing protein<br>13                                                                                 | -2.31 |
| 1439181_at   | BC043301                          | cDNA sequence BC043301                                                                                                               | -2.31 |
| 1416388_at   | Pip4k2c                           | phosphatidylinositol-5-phosphate 4-kinase, type II,<br>gamma                                                                         | -2.31 |
| 1433110_at   | 5830474E16Rik                     | RIKEN cDNA 5830474E16 gene                                                                                                           | -2.32 |
| 1448312_at   | Pcsk2                             | proprotein convertase subtilisin/kexin type 2                                                                                        | -2.32 |
| 1420871_at   | Gucy1b3                           | guanylate cyclase 1, soluble, beta 3                                                                                                 | -2.32 |
| 1460385_a_at | Zfp179                            | zinc finger protein 179                                                                                                              | -2.33 |



|              |                          |                                                                                                    |       |
|--------------|--------------------------|----------------------------------------------------------------------------------------------------|-------|
| 1454941_at   | LOC100045684             | similar to N-myristoyltransferase 1                                                                | -2.33 |
| 1429225_at   | Slc24a2                  | solute carrier family 24<br>(sodium/potassium/calcium exchanger), member<br>2                      | -2.33 |
| 1453994_at   | C230094A16Rik            | RIKEN cDNA C230094A16 gene                                                                         | -2.33 |
| 1450121_at   | Scn1a                    | sodium channel, voltage-gated, type I, alpha                                                       | -2.33 |
| 1455700_at   | Mterfd3                  | MTERF domain containing 3                                                                          | -2.33 |
| 1418478_at   | Lmo1                     | LIM domain only 1                                                                                  | -2.33 |
| 1418840_at   | Pdcd4                    | programmed cell death 4                                                                            | -2.34 |
| 1451040_at   | Dtd1 ///<br>LOC100048650 | D-tyrosyl-tRNA deacylase 1 homolog (S.<br>cerevisiae) /// similar to D-tyrosyl-tRNA deacylase<br>1 | -2.34 |
| 1418683_at   | Lin7b                    | lin-7 homolog B (C. elegans)                                                                       | -2.34 |
| 1439569_at   | Gpr83                    | G protein-coupled receptor 83                                                                      | -2.34 |
| 1451268_at   | Tram111                  | translocation associated membrane protein 1-like<br>1                                              | -2.34 |
| 1439959_at   | Fgf11                    | fibroblast growth factor 11                                                                        | -2.35 |
| 1433992_at   | Shroom2                  | shroom family member 2                                                                             | -2.35 |
| 1417050_at   | C1qtnf4                  | C1q and tumor necrosis factor related protein 4                                                    | -2.35 |
| 1436602_x_at | Cacna1b                  | calcium channel, voltage-dependent, N type,<br>alpha 1B subunit                                    | -2.35 |
| 1455325_at   | Rncr2                    | Retinal noncoding RNA 2                                                                            | -2.35 |
| 1438423_at   | Ssbp2                    | single-stranded DNA binding protein 2                                                              | -2.36 |
| 1428623_at   | Plxna1                   | plexin A1                                                                                          | -2.36 |
| 1429881_at   | Arhgap15                 | Rho GTPase activating protein 15                                                                   | -2.36 |
| 1425691_at   | B3gat1                   | beta-1,3-glucuronyltransferase 1<br>(glucuronosyltransferase P)                                    | -2.36 |
| 1416959_at   | Nr1d2                    | nuclear receptor subfamily 1, group D, member 2                                                    | -2.36 |
| 1435959_at   | Arhgap15                 | Rho GTPase activating protein 15                                                                   | -2.37 |
| 1434476_at   | Crtc1                    | CREB regulated transcription coactivator 1                                                         | -2.37 |
| 1442032_at   | BC030500                 | cDNA sequence BC030500                                                                             | -2.37 |
| 1445631_at   | Tmem16c                  | Transmembrane protein 16C                                                                          | -2.37 |
| 1426328_a_at | Scn3b                    | sodium channel, voltage-gated, type III, beta                                                      | -2.37 |
| 1436066_at   | Kalrn                    | kalirin, RhoGEF kinase                                                                             | -2.37 |
| 1427281_at   | Scn2a1                   | sodium channel, voltage-gated, type II, alpha 1                                                    | -2.38 |
| 1450143_at   | Rasgrp1                  | RAS guanyl releasing protein 1                                                                     | -2.38 |
| 1438262_at   | Slc8a2                   | solute carrier family 8 (sodium/calcium<br>exchanger), member 2                                    | -2.38 |
| 1428157_at   | Gng2                     | guanine nucleotide binding protein (G protein),<br>gamma 2 subunit                                 | -2.39 |
| 1419757_at   | Pitpnm2                  | phosphatidylinositol transfer protein, membrane-<br>associated 2                                   | -2.39 |
| 1439497_at   | 4933415E08Rik            | RIKEN cDNA 4933415E08 gene                                                                         | -2.39 |
| 1438784_at   | Bcl11b                   | B-cell leukemia/lymphoma 11B                                                                       | -2.39 |
| 1429021_at   | Epha4                    | Eph receptor A4                                                                                    | -2.39 |
| 1441963_at   | RP23-100C5.8             | ProSAPIP1 protein                                                                                  | -2.40 |
| 1424223_at   | 1700020C11Rik            | RIKEN cDNA 1700020C11 gene                                                                         | -2.40 |
| 1438217_at   | A2bp1                    | ataxin 2 binding protein 1                                                                         | -2.41 |
| 1426917_s_at | Scrn3                    | secernin 3                                                                                         | -2.41 |
| 1435033_at   | Arhgef4                  | Rho guanine nucleotide exchange factor (GEF) 4                                                     | -2.41 |
| 1441780_at   | ---                      | Transcribed locus                                                                                  | -2.41 |
| 1435991_at   | Nr3c2                    | nuclear receptor subfamily 3, group C, member 2                                                    | -2.42 |

|              |                            |                                                                                                                                             |       |
|--------------|----------------------------|---------------------------------------------------------------------------------------------------------------------------------------------|-------|
| 1457587_at   | Kcnq5                      | potassium voltage-gated channel, subfamily Q, member 5                                                                                      | -2.42 |
| 1424100_s_at | Cend1                      | cell cycle exit and neuronal differentiation 1                                                                                              | -2.42 |
| 1433791_at   | Rab9b                      | RAB9B, member RAS oncogene family                                                                                                           | -2.42 |
| 1452298_a_at | Myo5b                      | myosin Vb                                                                                                                                   | -2.42 |
| 1434064_at   | Orai3                      | ORAI calcium release-activated calcium modulator 3                                                                                          | -2.43 |
| 1448468_a_at | Kcnab1                     | potassium voltage-gated channel, shaker-related subfamily, beta member 1                                                                    | -2.43 |
| 1429211_at   | 2900078E11Rik ///<br>Cadm2 | RIKEN cDNA 2900078E11 gene /// cell adhesion molecule 2                                                                                     | -2.43 |
| 1455447_at   | D430019H16Rik              | RIKEN cDNA D430019H16 gene                                                                                                                  | -2.43 |
| 1438752_at   | A230058F20Rik              | RIKEN cDNA A230058F20 gene                                                                                                                  | -2.43 |
| 1455426_at   | Epha3                      | Eph receptor A3                                                                                                                             | -2.43 |
| 1456393_at   | 2310002J21Rik              | RIKEN cDNA 2310002J21 gene                                                                                                                  | -2.43 |
| 1441662_at   | Cyp4x1                     | cytochrome P450, family 4, subfamily x, polypeptide 1                                                                                       | -2.44 |
| 1422539_at   | Extl2                      | exotoses (multiple)-like 2                                                                                                                  | -2.44 |
| 1434638_at   | ---                        | Adult male corpora quadrigemina cDNA, RIKEN full-length enriched library, clone:B230036G05 product:unclassifiable, full insert sequence     | -2.44 |
| 1433826_at   | Tspyl3                     | TSPY-like 3                                                                                                                                 | -2.44 |
| 1426951_at   | Crim1                      | cysteine rich transmembrane BMP regulator 1 (chordin like)                                                                                  | -2.45 |
| 1432294_at   | 9330177L23Rik              | RIKEN cDNA 9330177L23 gene                                                                                                                  | -2.45 |
| 1438531_at   | A730054J21Rik              | RIKEN cDNA A730054J21 gene                                                                                                                  | -2.45 |
| 1445503_at   | Gm715                      | gene model 715, (NCBI)                                                                                                                      | -2.45 |
| 1429443_at   | Cpne4                      | copine IV                                                                                                                                   | -2.46 |
| 1417569_at   | Ncald                      | neurocalcin delta                                                                                                                           | -2.46 |
| 1427974_s_at | Cacna1d                    | calcium channel, voltage-dependent, L type, alpha 1D subunit                                                                                | -2.46 |
| 1457990_at   | Anks1b                     | ankyrin repeat and sterile alpha motif domain containing 1B                                                                                 | -2.47 |
| 1420660_at   | Lrrc6                      | leucine rich repeat containing 6 (testis)                                                                                                   | -2.47 |
| 1437422_at   | Sema5a                     | sema domain, seven thrombospondin repeats (type 1 and type 1-like), transmembrane domain (TM) and short cytoplasmic domain, (semaphorin) 5A | -2.47 |
| 1420563_at   | Gria3                      | glutamate receptor, ionotropic, AMPA3 (alpha 3)                                                                                             | -2.47 |
| 1438310_at   | ---                        | 10 days neonate cerebellum cDNA, RIKEN full-length enriched library, clone:B930095L19 product:unclassifiable, full insert sequence          | -2.48 |
| 1451840_at   | Kcni4                      | Kv channel interacting protein 4                                                                                                            | -2.48 |
| 1437168_at   | Srrp                       | serine-arginine repressor protein                                                                                                           | -2.48 |
| 1434728_at   | Gria3                      | glutamate receptor, ionotropic, AMPA3 (alpha 3)                                                                                             | -2.48 |
| 1436148_at   | ---                        | Adult male olfactory brain cDNA, RIKEN full-length enriched library, clone:6430531K17 product:unclassifiable, full insert sequence          | -2.48 |
| 1431216_s_at | Dnajc6                     | DnaJ (Hsp40) homolog, subfamily C, member 6                                                                                                 | -2.49 |
| 1441305_at   | ---                        | Adult male corpus striatum cDNA, RIKEN full-length enriched library, clone:C030044L04 product:unclassifiable, full insert sequence          | -2.49 |

|              |                           |                                                                                                                                   |       |
|--------------|---------------------------|-----------------------------------------------------------------------------------------------------------------------------------|-------|
| 1440030_at   | ---                       | ---                                                                                                                               | -2.49 |
| 1452952_at   | 9030418K01Rik             | RIKEN cDNA 9030418K01 gene                                                                                                        | -2.49 |
| 1456202_at   | Elf2                      | leucine rich repeat and fibronectin type III, extracellular 2                                                                     | -2.49 |
| 1439106_at   | Zfp462                    | zinc finger protein 462                                                                                                           | -2.50 |
| 1450370_a_at | Kcnp4                     | Kv channel interacting protein 4                                                                                                  | -2.50 |
| 1435227_at   | Bcl11b                    | B-cell leukemia/lymphoma 11B                                                                                                      | -2.51 |
| 1429269_at   | BC068157                  | cDNA sequence BC068157                                                                                                            | -2.51 |
| 1427086_at   | Slit3                     | slit homolog 3 (Drosophila)                                                                                                       | -2.52 |
| 1425749_at   | Stxbp6                    | syntaxin binding protein 6 (amisyn)                                                                                               | -2.52 |
| 1425277_at   | Slit1                     | slit homolog 1 (Drosophila)                                                                                                       | -2.52 |
| 1427286_at   | D11Bwg0517e               | DNA segment, Chr 11, Brigham & Women's Genetics 0517 expressed                                                                    | -2.53 |
| 1456119_at   | Grm5                      | glutamate receptor, metabotropic 5                                                                                                | -2.53 |
| 1448083_at   | LOC675405 ///<br>Nalcn    | sodium leak channel, non-selective /// similar to voltage gated channel like 1                                                    | -2.53 |
| 1448664_a_at | Spep                      | SPEG complex locus                                                                                                                | -2.53 |
| 1442371_at   | Lmbr1                     | limb region 1                                                                                                                     | -2.54 |
| 1417702_a_at | Hnmt                      | histamine N-methyltransferase                                                                                                     | -2.54 |
| 1435115_at   | Fndc5                     | fibronectin type III domain containing 5                                                                                          | -2.54 |
| 1436411_at   | Atp13a5                   | ATPase type 13A5                                                                                                                  | -2.54 |
| 1447788_s_at | Tspyl3                    | TSPY-like 3                                                                                                                       | -2.55 |
| 1435285_at   | Mpped2                    | metallophosphoesterase domain containing 2                                                                                        | -2.55 |
| 1453053_at   | 2610036L11Rik             | RIKEN cDNA 2610036L11 gene                                                                                                        | -2.55 |
| 1455258_at   | Kcnc2                     | potassium voltage gated channel, Shaw-related subfamily, member 2                                                                 | -2.56 |
| 1449172_a_at | Lin7b                     | lin-7 homolog B (C. elegans)                                                                                                      | -2.56 |
| 1418619_at   | Icam5                     | intercellular adhesion molecule 5, telencephalin                                                                                  | -2.56 |
| 1434271_at   | Gba2                      | glucosidase beta 2                                                                                                                | -2.56 |
| 1420403_at   | Atp2b2                    | ATPase, Ca++ transporting, plasma membrane 2                                                                                      | -2.56 |
| 1415935_at   | Smoc2                     | SPARC related modular calcium binding 2                                                                                           | -2.56 |
| 1434973_at   | Car7                      | carbonic anhydrase 7                                                                                                              | -2.57 |
| 1419442_at   | Matn2                     | matrilin 2                                                                                                                        | -2.57 |
| 1456377_x_at | Limd2 ///<br>LOC632329    | LIM domain containing 2 /// similar to epithelial protein lost in neoplasm                                                        | -2.57 |
| 1435957_at   | B830032F12                | hypothetical protein B830032F12                                                                                                   | -2.57 |
| 1436275_at   | Kcnp2                     | Kv channel-interacting protein 2                                                                                                  | -2.57 |
| 1443327_at   | D130043K22Rik             | RIKEN cDNA D130043K22 gene                                                                                                        | -2.58 |
| 1426729_at   | 2900046G09Rik             | RIKEN cDNA 2900046G09 gene                                                                                                        | -2.58 |
| 1422748_at   | Zeb2                      | zinc finger E-box binding homeobox 2                                                                                              | -2.59 |
| 1429105_at   | Dlgap1                    | discs, large (Drosophila) homolog-associated protein 1                                                                            | -2.61 |
| 1442370_at   | ---                       | 10 days neonate cortex cDNA, RIKEN full-length enriched library, clone:A830028E23<br>product:unclassifiable, full insert sequence | -2.61 |
| 1455358_at   | A2bp1                     | Ataxin 2 binding protein 1                                                                                                        | -2.61 |
| 1433711_s_at | LOC100047324 ///<br>Sesn1 | sestrin 1 /// similar to Sesn1 protein                                                                                            | -2.61 |
| 1456089_at   | Trim23                    | tripartite motif protein 23                                                                                                       | -2.61 |
| 1434015_at   | Slc2a6                    | solute carrier family 2 (facilitated glucose transporter), member 6                                                               | -2.61 |
| 1440910_at   | C77370                    | expressed sequence C77370                                                                                                         | -2.62 |
| 1444723_at   | 6530418L21Rik             | RIKEN cDNA 6530418L21 gene                                                                                                        | -2.62 |
| 1429447_at   | Evc2                      | Ellis van Creveld syndrome 2 homolog (human)                                                                                      | -2.63 |

|              |               |                                                                                                                                                       |       |
|--------------|---------------|-------------------------------------------------------------------------------------------------------------------------------------------------------|-------|
| 1440698_at   | ---           | ---                                                                                                                                                   | -2.64 |
| 1444693_at   | ---           | ---                                                                                                                                                   | -2.64 |
| 1431569_a_at | Lypd1         | Ly6/Plaur domain containing 1                                                                                                                         | -2.65 |
| 1436961_at   | Hspa12a       | heat shock protein 12A                                                                                                                                | -2.65 |
| 1438540_at   | Col25a1       | collagen, type XXV, alpha 1                                                                                                                           | -2.65 |
| 1434535_at   | Krt222        | keratin 222                                                                                                                                           | -2.65 |
| 1451678_at   | Narf          | nuclear prelamin A recognition factor                                                                                                                 | -2.65 |
| 1430237_at   | Cldn22        | claudin 22                                                                                                                                            | -2.66 |
| 1447992_s_at | Pcsk2         | proprotein convertase subtilisin/kexin type 2                                                                                                         | -2.66 |
| 1426389_at   | Camk1d        | calcium/calmodulin-dependent protein kinase ID                                                                                                        | -2.67 |
| 1451235_at   | Cend1         | cell cycle exit and neuronal differentiation 1                                                                                                        | -2.67 |
| 1444077_at   | ---           | Transcribed locus                                                                                                                                     | -2.67 |
| 1455145_at   | Pcdh19        | protocadherin 19                                                                                                                                      | -2.68 |
| 1423640_at   | Synpr         | synaptoporin                                                                                                                                          | -2.70 |
| 1439289_s_at | Pnmal1        | PNMA-like 1                                                                                                                                           | -2.70 |
| 1460588_at   | ---           | 10 days lactation, adult female mammary gland cDNA, RIKEN full-length enriched library, clone:D730013G10 product:unclassifiable, full insert sequence | -2.70 |
| 1440681_at   | Chrna7        | cholinergic receptor, nicotinic, alpha polypeptide 7                                                                                                  | -2.71 |
| 1421348_a_at | Cend1         | cell cycle exit and neuronal differentiation 1                                                                                                        | -2.71 |
| 1443855_at   | Kcnc1         | potassium voltage gated channel, Shaw-related subfamily, member 1                                                                                     | -2.71 |
| 1445691_at   | Chn1          | chimerin (chimaerin) 1                                                                                                                                | -2.72 |
| 1442701_at   | ---           | ---                                                                                                                                                   | -2.75 |
| 1441801_at   | Kctd4         | potassium channel tetramerisation domain containing 4                                                                                                 | -2.75 |
| 1449312_at   | Npy5r         | neuropeptide Y receptor Y5                                                                                                                            | -2.75 |
| 1452456_at   | Nrip2         | nuclear receptor interacting protein 2                                                                                                                | -2.76 |
| 1434051_s_at | Hspa12a       | heat shock protein 12A                                                                                                                                | -2.77 |
| 1421176_at   | Rasgrp1       | RAS guanyl releasing protein 1                                                                                                                        | -2.77 |
| 1459563_x_at | ---           | ---                                                                                                                                                   | -2.78 |
| 1419811_at   | D16Wsu65e     | DNA segment, Chr 16, Wayne State University 65, expressed                                                                                             | -2.78 |
| 1458114_at   | Samd12        | sterile alpha motif domain containing 12                                                                                                              | -2.79 |
| 1431749_a_at | Rasgrp1       | RAS guanyl releasing protein 1                                                                                                                        | -2.80 |
| 1428936_at   | Atp2b1        | ATPase, Ca <sup>++</sup> transporting, plasma membrane 1                                                                                              | -2.80 |
| 1442019_at   | B230343A10Rik | RIKEN cDNA B230343A10 gene                                                                                                                            | -2.81 |
| 1454969_at   | Lypd6         | LY6/PLAUR domain containing 6                                                                                                                         | -2.81 |
| 1439056_at   | EG636791      | predicted gene, EG636791                                                                                                                              | -2.81 |
| 1447385_at   | ---           | Adult male corpora quadrigemina cDNA, RIKEN full-length enriched library, clone:B230036G05 product:unclassifiable, full insert sequence               | -2.81 |
| 1429702_at   | 2900072G11Rik | RIKEN cDNA 2900072G11 gene                                                                                                                            | -2.81 |
| 1440589_at   | ---           | Transcribed locus                                                                                                                                     | -2.82 |
| 1437147_at   | Gabrg2        | gamma-aminobutyric acid (GABA-A) receptor, subunit gamma 2                                                                                            | -2.82 |
| 1422925_s_at | Acot3         | acyl-CoA thioesterase 3                                                                                                                               | -2.82 |
| 1439240_x_at | Lin7b         | lin-7 homolog B (C. elegans)                                                                                                                          | -2.82 |
| 1455373_at   | Pclo          | piccolo (presynaptic cytomatrix protein)                                                                                                              | -2.83 |
| 1436088_at   | 0910001A06Rik | RIKEN cDNA 0910001A06 gene                                                                                                                            | -2.83 |
| 1456953_at   | Col19a1       | collagen, type XIX, alpha 1                                                                                                                           | -2.83 |

|              |                   |                                                                                                                                                             |       |
|--------------|-------------------|-------------------------------------------------------------------------------------------------------------------------------------------------------------|-------|
| 1434776_at   | Sema5a            | sema domain, seven thrombospondin repeats (type 1 and type 1-like), transmembrane domain (TM) and short cytoplasmic domain, (semaphorin) 5A                 | -2.83 |
| 1455374_at   | Kcnj3             | potassium inwardly-rectifying channel, subfamily J, member 3                                                                                                | -2.83 |
| 1448477_at   | Chst12            | carbohydrate sulfotransferase 12                                                                                                                            | -2.84 |
| 1418452_at   | Gng2              | guanine nucleotide binding protein (G protein), gamma 2 subunit                                                                                             | -2.85 |
| 1439757_s_at | Epha4             | Eph receptor A4                                                                                                                                             | -2.85 |
| 1460674_at   | Paqr7             | progesterin and adipoQ receptor family member VII                                                                                                           | -2.85 |
| 1455960_at   | Megf9             | multiple EGF-like-domains 9                                                                                                                                 | -2.86 |
| 1421969_a_at | Faah              | fatty acid amide hydrolase                                                                                                                                  | -2.87 |
| 1439697_at   | Il1rap            | interleukin 1 receptor accessory protein                                                                                                                    | -2.87 |
| 1443612_at   | Tmem16c           | Transmembrane protein 16C                                                                                                                                   | -2.87 |
| 1441927_at   | Syt7              | Synaptotagmin VII                                                                                                                                           | -2.88 |
| 1433885_at   | Iqgap2            | IQ motif containing GTPase activating protein 2                                                                                                             | -2.90 |
| 1418314_a_at | A2bp1             | ataxin 2 binding protein 1                                                                                                                                  | -2.90 |
| 1440438_at   | ---               | Transcribed locus                                                                                                                                           | -2.91 |
| 1434454_at   | D16Wsu65e         | DNA segment, Chr 16, Wayne State University 65, expressed                                                                                                   | -2.91 |
| 1437631_at   | Kcni4             | Kv channel interacting protein 4                                                                                                                            | -2.92 |
| 1452966_at   | Bcl11b            | B-cell leukemia/lymphoma 11B                                                                                                                                | -2.92 |
| 1440849_at   | 6330417G04Rik     | RIKEN cDNA 6330417G04 gene                                                                                                                                  | -2.93 |
| 1437750_at   | Tmem158           | Transmembrane protein 158                                                                                                                                   | -2.94 |
| 1429918_at   | Arhgap20          | Rho GTPase activating protein 20                                                                                                                            | -2.95 |
| 1438710_at   | Htr1a             | 5-hydroxytryptamine (serotonin) receptor 1A                                                                                                                 | -2.96 |
| 1453424_at   | Fyco1             | FYVE and coiled-coil domain containing 1                                                                                                                    | -2.96 |
| 1443790_x_at | 4930414L22Rik     | RIKEN cDNA 4930414L22 gene                                                                                                                                  | -2.97 |
| 1450486_a_at | Opr1              | opioid receptor-like 1                                                                                                                                      | -2.98 |
| 1427646_a_at | Arhgef2           | rho/rac guanine nucleotide exchange factor (GEF) 2                                                                                                          | -2.99 |
| 1429402_at   | Glt8d2            | glycosyltransferase 8 domain containing 2                                                                                                                   | -3.01 |
| 1431229_at   | lpw               | imprinted gene in the Prader-Willi syndrome region                                                                                                          | -3.02 |
| 1433681_x_at | Capn3             | calpain 3                                                                                                                                                   | -3.02 |
| 1444687_at   | C1ql2             | complement component 1, q subcomponent-like 2                                                                                                               | -3.02 |
| 1445234_at   | C130030K03Rik     | RIKEN cDNA C130030K03 gene                                                                                                                                  | -3.04 |
| 1446632_at   | ---               | ---                                                                                                                                                         | -3.04 |
| 1417391_a_at | Il16              | interleukin 16                                                                                                                                              | -3.04 |
| 1454043_a_at | Kcnab1            | potassium voltage-gated channel, shaker-related subfamily, beta member 1                                                                                    | -3.06 |
| 1453756_at   | 2900075N08Rik     | RIKEN cDNA 2900075N08 gene                                                                                                                                  | -3.06 |
| 1423305_at   | Extl1             | exostoses (multiple)-like 1                                                                                                                                 | -3.08 |
| 1456798_at   | 9330118A15Rik     | RIKEN cDNA 9330118A15 gene                                                                                                                                  | -3.08 |
| 1452065_at   | Vstm2a            | V-set and transmembrane domain containing 2A                                                                                                                | -3.08 |
| 1457072_at   | Bcl11a /// Ppfia3 | Protein tyrosine phosphatase, receptor type, f polypeptide (PTPRF), interacting protein (liprin), alpha 3 /// B-cell CLL/lymphoma 11A (zinc finger protein) | -3.09 |
| 1451525_at   | Arhgap12          | Rho GTPase activating protein 12                                                                                                                            | -3.11 |
| 1422710_a_at | Cacna1h           | calcium channel, voltage-dependent, T type, alpha 1H subunit                                                                                                | -3.11 |

|              |                         |                                                                                                                             |       |
|--------------|-------------------------|-----------------------------------------------------------------------------------------------------------------------------|-------|
| 1423270_at   | Nedd4l                  | neural precursor cell expressed, developmentally down-regulated gene 4-like                                                 | -3.11 |
| 1435135_at   | Aadacl1                 | arylacetamide deacetylase-like 1                                                                                            | -3.12 |
| 1428305_at   | Pcsk2                   | proprotein convertase subtilisin/kexin type 2                                                                               | -3.12 |
| 1427610_at   | Dsp                     | desmoplakin                                                                                                                 | -3.13 |
| 1430952_at   | 3110039C02Rik           | RIKEN cDNA 3110039C02 gene                                                                                                  | -3.16 |
| 1455365_at   | Cdh8                    | cadherin 8                                                                                                                  | -3.16 |
| 1431052_at   | Arhgap12                | Rho GTPase activating protein 12                                                                                            | -3.16 |
| 1439870_at   | A330008L17Rik           | RIKEN cDNA A330008L17 gene                                                                                                  | -3.19 |
| 1457843_at   | Lypd6                   | LY6/PLAUR domain containing 6                                                                                               | -3.19 |
| 1449173_at   | Mpp2                    | membrane protein, palmitoylated 2 (MAGUK p55 subfamily member 2)                                                            | -3.20 |
| 1460625_at   | Gm1568                  | gene model 1568, (NCBI)                                                                                                     | -3.25 |
| 1421318_at   | LOC100047238            | similar to N-deacetylase/N-sulfotransferase 4                                                                               | -3.26 |
| 1457092_at   | C630007B19Rik           | RIKEN cDNA C630007B19 gene                                                                                                  | -3.27 |
| 1423201_at   | Ncor1                   | nuclear receptor co-repressor 1                                                                                             | -3.28 |
| 1425344_at   | Narf                    | nuclear prelamin A recognition factor                                                                                       | -3.28 |
| 1457354_at   | Krt222                  | keratin 222                                                                                                                 | -3.29 |
| 1437183_at   | LOC100045241 /// Lrrc4b | leucine rich repeat containing 4B /// similar to Leucine rich repeat containing 4B                                          | -3.29 |
| 1440181_at   | Gm1568                  | gene model 1568, (NCBI)                                                                                                     | -3.31 |
| 1446364_at   | ---                     | ---                                                                                                                         | -3.33 |
| 1448530_at   | Gmpr /// LOC100045393   | guanosine monophosphate reductase /// similar to guanosine monophosphate reductase                                          | -3.34 |
| 1419406_a_at | Bcl11a                  | B-cell CLL/lymphoma 11A (zinc finger protein)                                                                               | -3.34 |
| 1439947_at   | Cyp11a1                 | cytochrome P450, family 11, subfamily a, polypeptide 1                                                                      | -3.35 |
| 1429183_at   | Pkp2                    | plakophilin 2                                                                                                               | -3.35 |
| 1455772_at   | Pgr                     | progesterone receptor                                                                                                       | -3.36 |
| 1439699_at   | ---                     | 15 days embryo head cDNA, RIKEN full-length enriched library, clone:D930025A16 product:unclassifiable, full insert sequence | -3.37 |
| 1428400_at   | 2200002K05Rik           | RIKEN cDNA 2200002K05 gene                                                                                                  | -3.39 |
| 1437385_at   | Ccbe1                   | collagen and calcium binding EGF domains 1                                                                                  | -3.40 |
| 1437870_at   | Slco4c1                 | solute carrier organic anion transporter family, member 4C1                                                                 | -3.40 |
| 1431362_a_at | Smoc2                   | SPARC related modular calcium binding 2                                                                                     | -3.41 |
| 1449799_s_at | Pkp2                    | plakophilin 2                                                                                                               | -3.42 |
| 1442927_at   | Ptk2b                   | PTK2 protein tyrosine kinase 2 beta                                                                                         | -3.43 |
| 1456389_at   | Zeb2                    | zinc finger E-box binding homeobox 2                                                                                        | -3.47 |
| 1458403_at   | Tnik                    | TRAF2 and NCK interacting kinase                                                                                            | -3.47 |
| 1459921_at   | Nxph1                   | neurexophilin 1                                                                                                             | -3.51 |
| 1435311_s_at | Fbxo7                   | F-box protein 7                                                                                                             | -3.53 |
| 1427157_at   | Ccdc85a                 | coiled-coil domain containing 85A                                                                                           | -3.53 |
| 1435396_at   | Stxbp6                  | syntaxin binding protein 6 (amisyn)                                                                                         | -3.54 |
| 1440545_at   | ENSMUSG00000075319      | predicted gene, ENSMUSG00000075319                                                                                          | -3.56 |
| 1443287_at   | Gm1337                  | gene model 1337, (NCBI)                                                                                                     | -3.56 |
| 1430648_at   | Scn2b                   | sodium channel, voltage-gated, type II, beta                                                                                | -3.57 |
| 1452263_at   | Slc35f4                 | solute carrier family 35, member F4                                                                                         | -3.57 |
| 1448930_at   | 3010026O09Rik           | RIKEN cDNA 3010026O09 gene                                                                                                  | -3.59 |
| 1452453_a_at | Camk2a                  | calcium/calmodulin-dependent protein kinase II alpha                                                                        | -3.59 |
| 1436532_at   | Dclk3                   | doublecortin-like kinase 3                                                                                                  | -3.60 |
| 1442272_at   | 1700021K10Rik           | RIKEN cDNA 1700021K10 gene                                                                                                  | -3.60 |

|              |               |                                                                                                                                                                      |       |
|--------------|---------------|----------------------------------------------------------------------------------------------------------------------------------------------------------------------|-------|
| 1425337_at   | Slc12a5       | solute carrier family 12, member 5                                                                                                                                   | -3.61 |
| 1434501_at   | Ypel4         | yippee-like 4 (Drosophila)                                                                                                                                           | -3.63 |
| 1447005_at   | ---           | ---                                                                                                                                                                  | -3.68 |
| 1452332_at   | Ccdc85a       | coiled-coil domain containing 85A                                                                                                                                    | -3.68 |
| 1440418_at   | ---           | ---                                                                                                                                                                  | -3.70 |
| 1436998_at   | Ankrd43       | ankyrin repeat domain 43                                                                                                                                             | -3.71 |
| 1437018_at   | Pnma2         | paraneoplastic antigen MA2                                                                                                                                           | -3.76 |
| 1438235_at   | ---           | ---                                                                                                                                                                  | -3.77 |
| 1434052_at   | AI593442      | expressed sequence AI593442                                                                                                                                          | -3.79 |
| 1436142_at   | Akap5         | A kinase (PRKA) anchor protein 5                                                                                                                                     | -3.80 |
| 1450712_at   | Kcnj9         | potassium inwardly-rectifying channel, subfamily J, member 9                                                                                                         | -3.82 |
| 1453245_at   | 9130024F11Rik | RIKEN cDNA 9130024F11 gene                                                                                                                                           | -3.83 |
| 1438020_at   | Hapln1        | hyaluronan and proteoglycan link protein 1                                                                                                                           | -3.86 |
| 1447222_at   | Hspa12a       | heat shock protein 12A                                                                                                                                               | -3.92 |
| 1459717_at   | ---           | Transcribed locus                                                                                                                                                    | -3.95 |
| 1434819_at   | St6gal2       | beta galactoside alpha 2,6 sialyltransferase 2                                                                                                                       | -4.00 |
| 1455753_at   | C630035N08Rik | RIKEN cDNA C630035N08 gene                                                                                                                                           | -4.00 |
| 1426043_a_at | Capn3         | calpain 3                                                                                                                                                            | -4.02 |
| 1455040_s_at | 1110062M06Rik | RIKEN cDNA 1110062M06 gene                                                                                                                                           | -4.02 |
| 1457066_at   | Abcc8         | ATP-binding cassette, sub-family C (CFTR/MRP), member 8                                                                                                              | -4.03 |
| 1441482_at   | ---           | ---                                                                                                                                                                  | -4.06 |
| 1458697_at   | ---           | Transcribed locus                                                                                                                                                    | -4.08 |
| 1433032_at   | 2900064K03Rik | RIKEN cDNA 2900064K03 gene                                                                                                                                           | -4.14 |
| 1438500_at   | Prpt3         | proline-rich transmembrane protein 3                                                                                                                                 | -4.20 |
| 1433469_at   | Lrrn2         | leucine rich repeat protein 2, neuronal                                                                                                                              | -4.23 |
| 1418174_at   | Dbp           | D site albumin promoter binding protein                                                                                                                              | -4.26 |
| 1425870_a_at | Kcnip2        | Kv channel-interacting protein 2                                                                                                                                     | -4.26 |
| 1435407_at   | ---           | Adult male medulla oblongata cDNA, RIKEN full-length enriched library, clone:6332404K23 product:unclassifiable, full insert sequence                                 | -4.32 |
| 1422052_at   | Cdh8          | cadherin 8                                                                                                                                                           | -4.42 |
| 1442581_at   | Ksr1          | kinase suppressor of ras 1                                                                                                                                           | -4.52 |
| 1436021_at   | Mfsd4         | major facilitator superfamily domain containing 4                                                                                                                    | -4.70 |
| 1417489_at   | Npy2r         | neuropeptide Y receptor Y2                                                                                                                                           | -4.71 |
| 1426115_a_at | Kcnj9         | potassium inwardly-rectifying channel, subfamily J, member 9                                                                                                         | -4.90 |
| 1445415_at   | EG328191      | Predicted gene, EG328191                                                                                                                                             | -5.13 |
| 1455531_at   | Mfsd4         | major facilitator superfamily domain containing 4                                                                                                                    | -5.15 |
| 1417638_at   | Lefty1        | left right determination factor 1                                                                                                                                    | -5.16 |
| 1443876_at   | ---           | 16 days neonate thymus cDNA, RIKEN full-length enriched library, clone:A130020E07 product:calcium/calmodulin-dependent protein kinase II alpha, full insert sequence | -5.16 |
| 1439872_at   | ---           | KCNA2 (Kcna2) mRNA, 3' UTR                                                                                                                                           | -5.17 |
| 1435493_at   | Dsp           | desmoplakin                                                                                                                                                          | -5.30 |
| 1438211_s_at | Dbp           | D site albumin promoter binding protein                                                                                                                              | -5.39 |
| 1435494_s_at | Dsp           | desmoplakin                                                                                                                                                          | -5.49 |
| 1418047_at   | Neurod6       | neurogenic differentiation 6                                                                                                                                         | -5.60 |
| 1440946_at   | ---           | Transcribed locus                                                                                                                                                    | -5.98 |
| 1447726_at   | Ripply2       | rippy2 homolog (zebrafish)                                                                                                                                           | -6.38 |
| 1449472_at   | Gpr12         | G-protein coupled receptor 12                                                                                                                                        | -6.56 |
| 1447115_at   | C78409        | expressed sequence C78409                                                                                                                                            | -6.95 |

|              |                             |                                                                                       |        |
|--------------|-----------------------------|---------------------------------------------------------------------------------------|--------|
| 1433793_s_at | Nrip2                       | nuclear receptor interacting protein 2                                                | -7.10  |
| 1439479_at   | Lct                         | lactase                                                                               | -7.32  |
| 1418266_at   | Alox12b ///<br>LOC100045755 | arachidonate 12-lipoxygenase, 12R type /// similar<br>to arachidonate 12-lipoxygenase | -20.35 |

---
