# Supplementary material for: Glial responses during epileptogenesis in Mus musculus point to potential therapeutic targets
Source: PubMed Central journal article supplement (PMC6095496; doi:10.1371/journal.pone.0201742), 2018-08-16
Supplement: pone.0201742.s007.pdf [file pone.0201742.s007.pdf]

**Table S3:** Significant gene expression changes detected by microarrays following SAM analysis at 24 hours post-injection (thresholds:  $\geq 2$  fold and 0% median FDR).

| Probe Set ID | Gene Symbol                                       | Gene Title                                                                                                          | Fold Change |
|--------------|---------------------------------------------------|---------------------------------------------------------------------------------------------------------------------|-------------|
| 1459372_at   | Npas4                                             | neuronal PAS domain protein 4                                                                                       | 27.33       |
| 1449254_at   | Spp1                                              | secreted phosphoprotein 1                                                                                           | 22.48       |
| 1449827_at   | Acan                                              | aggrecan                                                                                                            | 19.91       |
| 1419149_at   | Serpine1                                          | serine (or cysteine) peptidase inhibitor, clade E, member 1                                                         | 18.71       |
| 1436484_at   | C030019I05Rik                                     | RIKEN cDNA C030019I05 gene                                                                                          | 16.03       |
| 1438133_a_at | Cyr61                                             | cysteine rich protein 61                                                                                            | 15.96       |
| 1425964_x_at | Hspb1                                             | heat shock protein 1                                                                                                | 14.48       |
| 1420720_at   | LOC100044234 /// Nptx2                            | neuronal pentraxin 2 /// hypothetical protein LOC100044234                                                          | 14.10       |
| 1425952_a_at | Gcg                                               | glucagon                                                                                                            | 13.22       |
| 1416039_x_at | Cyr61                                             | cysteine rich protein 61                                                                                            | 13.06       |
| 1449982_at   | Il11                                              | interleukin 11                                                                                                      | 12.44       |
| 1442340_x_at | Cyr61                                             | cysteine rich protein 61                                                                                            | 11.92       |
| 1424638_at   | Cdkn1a                                            | cyclin-dependent kinase inhibitor 1A (P21)                                                                          | 10.59       |
| 1419599_s_at | Ms4a6d                                            | membrane-spanning 4-domains, subfamily A, member 6D                                                                 | 9.44        |
| 1422943_a_at | Hspb1                                             | heat shock protein 1                                                                                                | 9.32        |
| 1420753_at   | Tll1                                              | tolloid-like                                                                                                        | 9.24        |
| 1453238_s_at | 3930401B19Rik /// A130040M12Rik /// E430024C06Rik | RIKEN cDNA 3930401B19 gene /// RIKEN cDNA A130040M12 gene /// RIKEN cDNA E430024C06 gene /// similar to gag protein | 9.18        |
|              | /// LOC100039378                                  |                                                                                                                     |             |
|              | /// LOC100039583                                  |                                                                                                                     |             |
|              | /// LOC100041150                                  |                                                                                                                     |             |
|              | /// LOC100041274                                  |                                                                                                                     |             |
|              | /// LOC100041962                                  |                                                                                                                     |             |
|              | /// LOC100043154                                  |                                                                                                                     |             |
|              | /// LOC100043406                                  |                                                                                                                     |             |
|              | /// LOC100048290                                  |                                                                                                                     |             |
| 1416431_at   | Tubb6                                             | tubulin, beta 6                                                                                                     | 9.07        |
| 1449960_at   | Nptx2                                             | neuronal pentraxin 2                                                                                                | 8.89        |
| 1428776_at   | Slc10a6                                           | solute carrier family 10 (sodium/bile acid cotransporter family), member 6                                          | 8.70        |
| 1440342_at   | G530011O06Rik                                     | RIKEN cDNA G530011O06 gene                                                                                          | 8.22        |
| 1416529_at   | Emp1                                              | epithelial membrane protein 1                                                                                       | 8.22        |
| 1423100_at   | Fos                                               | FBJ osteosarcoma oncogene                                                                                           | 8.18        |
| 1434089_at   | Synpo                                             | synaptopodin                                                                                                        | 8.02        |
| 1424528_at   | Cgref1                                            | cell growth regulator with EF hand domain 1                                                                         | 7.71        |
| 1434376_at   | Cd44                                              | CD44 antigen                                                                                                        | 7.66        |
| 1418349_at   | Hbegf                                             | heparin-binding EGF-like growth factor                                                                              | 7.63        |
| 1424248_at   | Arpp21                                            | cyclic AMP-regulated phosphoprotein, 21                                                                             | 7.60        |
| 1424880_at   | Trib1                                             | tribbles homolog 1 (Drosophila)                                                                                     | 7.17        |
| 1444982_at   | ---                                               | ---                                                                                                                 | 7.09        |
| 1453851_a_at | Gadd45g                                           | growth arrest and DNA-damage-inducible 45 gamma                                                                     | 6.99        |
| 1421207_at   | Lif                                               | leukemia inhibitory factor                                                                                          | 6.95        |

|              |                                                                                    |                                                                                                                         |      |
|--------------|------------------------------------------------------------------------------------|-------------------------------------------------------------------------------------------------------------------------|------|
| 1437270_a_at | Clcf1                                                                              | cardiotrophin-like cytokine factor 1                                                                                    | 6.88 |
| 1451798_at   | Il1rn                                                                              | interleukin 1 receptor antagonist                                                                                       | 6.73 |
| 1424529_s_at | Cgref1                                                                             | cell growth regulator with EF hand domain 1                                                                             | 6.73 |
| 1448061_at   | Msr1                                                                               | macrophage scavenger receptor 1                                                                                         | 6.61 |
| 1452318_a_at | Hspa1b                                                                             | heat shock protein 1B                                                                                                   | 6.49 |
| 1418936_at   | Maff                                                                               | v-maf musculoaponeurotic fibrosarcoma oncogene family, protein F (avian)                                                | 6.46 |
| 1449388_at   | Thbs4                                                                              | thrombospondin 4                                                                                                        | 6.38 |
| 1437056_x_at | Crispld2                                                                           | cysteine-rich secretory protein LCCL domain containing 2                                                                | 6.12 |
| 1424090_at   | Sdcbp2                                                                             | syndecan binding protein (syntenin) 2                                                                                   | 5.86 |
| 1417936_at   | Ccl9                                                                               | chemokine (C-C motif) ligand 9                                                                                          | 5.81 |
| 1423312_at   | Tpbp                                                                               | trophoblast glycoprotein                                                                                                | 5.80 |
| 1433599_at   | Baz1a                                                                              | bromodomain adjacent to zinc finger domain 1A                                                                           | 5.75 |
| 1455900_x_at | Tgm2                                                                               | transglutaminase 2, C polypeptide                                                                                       | 5.63 |
| 1419091_a_at | Anxa2                                                                              | annexin A2                                                                                                              | 5.61 |
| 1448471_a_at | Ctla2a                                                                             | cytotoxic T lymphocyte-associated protein 2 alpha                                                                       | 5.57 |
| 1427355_at   | Calca                                                                              | calcitonin/calcitonin-related polypeptide, alpha                                                                        | 5.55 |
| 1418350_at   | Hbegf                                                                              | heparin-binding EGF-like growth factor                                                                                  | 5.43 |
| 1424107_at   | Kif18a                                                                             | kinesin family member 18A                                                                                               | 5.36 |
| 1425351_at   | Srxn1                                                                              | sulfiredoxin 1 homolog (S. cerevisiae)                                                                                  | 5.24 |
| 1422706_at   | Tmepai                                                                             | transmembrane, prostate androgen induced RNA                                                                            | 5.21 |
| 1437247_at   | Fosl2 ///<br>LOC634417                                                             | fos-like antigen 2 /// similar to fos-like antigen 2                                                                    | 5.17 |
| 1418804_at   | Sucnr1                                                                             | succinate receptor 1                                                                                                    | 5.03 |
| 1460302_at   | LOC640441 ///<br>Thbs1                                                             | thrombospondin 1 /// similar to thrombospondin 1                                                                        | 4.99 |
| 1429637_at   | 2210419I08Rik                                                                      | RIKEN cDNA 2210419I08 gene                                                                                              | 4.85 |
| 1460227_at   | Timp1                                                                              | tissue inhibitor of metalloproteinase 1                                                                                 | 4.82 |
| 1436778_at   | Cybb                                                                               | cytochrome b-245, beta polypeptide                                                                                      | 4.75 |
| 1449872_at   | Hspb3                                                                              | heat shock protein 3                                                                                                    | 4.74 |
| 1429399_at   | Rnf125                                                                             | ring finger protein 125                                                                                                 | 4.74 |
| 1435137_s_at | 1200015M12Rik<br>/// 1200016E24Rik<br>///<br>A130040M12Rik<br>///<br>E430024C06Rik | RIKEN cDNA 1200015M12 gene /// RIKEN cDNA 1200016E24 gene /// RIKEN cDNA A130040M12 gene /// RIKEN cDNA E430024C06 gene | 4.71 |
| 1437132_x_at | Nedd9                                                                              | neural precursor cell expressed, developmentally down-regulated gene 9                                                  | 4.70 |
| 1437173_at   | Edg3                                                                               | endothelial differentiation, sphingolipid G-protein-coupled receptor, 3                                                 | 4.69 |
| 1437766_at   | ---                                                                                | ---                                                                                                                     | 4.66 |
| 1421814_at   | Msn                                                                                | moesin                                                                                                                  | 4.63 |
| 1442082_at   | C3ar1                                                                              | complement component 3a receptor 1                                                                                      | 4.59 |
| 1417400_at   | Rai14                                                                              | retinoic acid induced 14                                                                                                | 4.59 |
| 1448748_at   | Plek                                                                               | pleckstrin                                                                                                              | 4.59 |
| 1444307_at   | ---                                                                                | Transcribed locus                                                                                                       | 4.51 |
| 1451280_at   | Arpp21                                                                             | cyclic AMP-regulated phosphoprotein, 21                                                                                 | 4.51 |
| 1416762_at   | S100a10                                                                            | S100 calcium binding protein A10 (calpactin)                                                                            | 4.51 |
| 1426875_s_at | Srxn1                                                                              | sulfiredoxin 1 homolog (S. cerevisiae)                                                                                  | 4.43 |

|              |                                                                                                                           |                                                                                                                                                                                   |      |
|--------------|---------------------------------------------------------------------------------------------------------------------------|-----------------------------------------------------------------------------------------------------------------------------------------------------------------------------------|------|
| 1438761_a_at | EG666231 ///<br>EG668343 ///<br>LOC546355 ///<br>LOC627245 ///<br>LOC632337 ///<br>LOC677259 ///<br>Odc1                  | ornithine decarboxylase, structural 1 /// similar to<br>Ornithine decarboxylase (ODC) /// similar to Odc1<br>protein /// predicted gene, EG666231 /// predicted<br>gene, EG668343 | 4.42 |
| 1452352_at   | Ctla2b                                                                                                                    | cytotoxic T lymphocyte-associated protein 2 beta                                                                                                                                  | 4.39 |
| 1456642_x_at | S100a10                                                                                                                   | S100 calcium binding protein A10 (calpactin)                                                                                                                                      | 4.36 |
| 1433675_at   | Snhg1                                                                                                                     | small nucleolar RNA host gene (non-protein<br>coding) 1                                                                                                                           | 4.34 |
| 1424067_at   | Icam1                                                                                                                     | intercellular adhesion molecule                                                                                                                                                   | 4.32 |
| 1416342_at   | Tnc                                                                                                                       | tenascin C                                                                                                                                                                        | 4.32 |
| 1450971_at   | Gadd45b                                                                                                                   | growth arrest and DNA-damage-inducible 45 beta                                                                                                                                    | 4.27 |
| 1429848_at   | Pvr                                                                                                                       | poliovirus receptor                                                                                                                                                               | 4.25 |
| 1417426_at   | Srgn                                                                                                                      | serglycin                                                                                                                                                                         | 4.25 |
| 1448303_at   | Gpnmb                                                                                                                     | glycoprotein (transmembrane) nmb                                                                                                                                                  | 4.20 |
| 1456251_x_at | Tspo                                                                                                                      | translocator protein                                                                                                                                                              | 4.18 |
| 1435693_at   | Mall                                                                                                                      | mal, T-cell differentiation protein-like                                                                                                                                          | 4.17 |
| 1417394_at   | Klf4                                                                                                                      | Kruppel-like factor 4 (gut)                                                                                                                                                       | 4.05 |
| 1431043_at   | Kbtbd5                                                                                                                    | kelch repeat and BTB (POZ) domain containing 5                                                                                                                                    | 4.05 |
| 1421855_at   | Fgl2                                                                                                                      | fibrinogen-like protein 2                                                                                                                                                         | 4.02 |
| 1432176_a_at | Eng                                                                                                                       | endoglin                                                                                                                                                                          | 3.92 |
| 1440142_s_at | Gfap                                                                                                                      | glial fibrillary acidic protein                                                                                                                                                   | 3.90 |
| 1451680_at   | Srxn1                                                                                                                     | sulfiredoxin 1 homolog (S. cerevisiae)                                                                                                                                            | 3.78 |
| 1439399_a_at | Snhg1                                                                                                                     | small nucleolar RNA host gene (non-protein<br>coding) 1                                                                                                                           | 3.78 |
| 1422452_at   | Bag3                                                                                                                      | Bcl2-associated athanogene 3                                                                                                                                                      | 3.77 |
| 1437711_x_at | EG666231 ///<br>EG668343 ///<br>LOC546355 ///<br>LOC627245 ///<br>LOC632337 ///<br>LOC665017 ///<br>LOC676173 ///<br>Odc1 | ornithine decarboxylase, structural 1 /// similar to<br>Ornithine decarboxylase (ODC) /// similar to Odc1<br>protein /// predicted gene, EG666231 /// predicted<br>gene, EG668343 | 3.74 |
| 1457984_at   | Crh                                                                                                                       | corticotropin releasing hormone                                                                                                                                                   | 3.71 |
| 1417818_at   | Wwtr1                                                                                                                     | WW domain containing transcription regulator 1                                                                                                                                    | 3.69 |
| 1415943_at   | Sdc1                                                                                                                      | syndecan 1                                                                                                                                                                        | 3.68 |
| 1434891_at   | Ptgnrn                                                                                                                    | prostaglandin F2 receptor negative regulator                                                                                                                                      | 3.67 |
| 1433674_a_at | Snhg1                                                                                                                     | small nucleolar RNA host gene (non-protein<br>coding) 1                                                                                                                           | 3.67 |
| 1451969_s_at | Parp3                                                                                                                     | poly (ADP-ribose) polymerase family, member 3                                                                                                                                     | 3.66 |
| 1419127_at   | Npy                                                                                                                       | neuropeptide Y                                                                                                                                                                    | 3.65 |
| 1450641_at   | Vim                                                                                                                       | vimentin                                                                                                                                                                          | 3.65 |
| 1452717_at   | Slc25a24                                                                                                                  | solute carrier family 25 (mitochondrial carrier,<br>phosphate carrier), member 24                                                                                                 | 3.61 |
| 1435084_at   | C730049O14Rik                                                                                                             | RIKEN cDNA C730049O14 gene                                                                                                                                                        | 3.59 |
| 1422286_a_at | Tgif1                                                                                                                     | TG interacting factor 1                                                                                                                                                           | 3.57 |
| 1447825_x_at | Pcdh8                                                                                                                     | protocadherin 8                                                                                                                                                                   | 3.56 |

|              |                            |                                                                                                                             |      |
|--------------|----------------------------|-----------------------------------------------------------------------------------------------------------------------------|------|
| 1448870_at   | Ltbp1                      | latent transforming growth factor beta binding protein 1                                                                    | 3.51 |
| 1418674_at   | Osmr                       | oncostatin M receptor                                                                                                       | 3.49 |
| 1450708_at   | Scg2                       | secretogranin II                                                                                                            | 3.40 |
| 1448323_a_at | Bgn                        | biglycan                                                                                                                    | 3.38 |
| 1422629_s_at | Shroom3                    | shroom family member 3                                                                                                      | 3.37 |
| 1427164_at   | Il13ra1                    | interleukin 13 receptor, alpha 1                                                                                            | 3.37 |
| 1416067_at   | Ifrd1                      | interferon-related developmental regulator 1                                                                                | 3.36 |
| 1449221_a_at | Rrbp1                      | ribosome binding protein 1                                                                                                  | 3.32 |
| 1421172_at   | Adam12                     | a disintegrin and metallopeptidase domain 12 (meltrin alpha)                                                                | 3.31 |
| 1452217_at   | Ahnak                      | AHNAK nucleoprotein (desmoyokin)                                                                                            | 3.31 |
| 1417051_at   | Pcdh8                      | protocadherin 8                                                                                                             | 3.30 |
| 1428083_at   | 2310043N10Rik              | RIKEN cDNA 2310043N10 gene                                                                                                  | 3.30 |
| 1452784_at   | Itgav                      | integrin alpha V                                                                                                            | 3.30 |
| 1426063_a_at | Gem                        | GTP binding protein (gene overexpressed in skeletal muscle)                                                                 | 3.23 |
| 1454783_at   | Il13ra1                    | interleukin 13 receptor, alpha 1                                                                                            | 3.22 |
| 1448894_at   | Akr1b8                     | aldo-keto reductase family 1, member B8                                                                                     | 3.22 |
| 1436449_at   | ---                        | 15 days embryo head cDNA, RIKEN full-length enriched library, clone:D930025C07 product:unclassifiable, full insert sequence | 3.21 |
| 1457474_at   | ---                        | Transcribed locus                                                                                                           | 3.20 |
| 1435926_at   | Chml                       | choroideremia-like                                                                                                          | 3.20 |
| 1423062_at   | Igfbp3                     | insulin-like growth factor binding protein 3                                                                                | 3.18 |
| 1423904_a_at | Pvr                        | poliovirus receptor                                                                                                         | 3.18 |
| 1433555_at   | Eaf1                       | ELL associated factor 1                                                                                                     | 3.17 |
| 1426246_at   | Pros1                      | protein S (alpha)                                                                                                           | 3.17 |
| 1451171_at   | 2310008H04Rik              | RIKEN cDNA 2310008H04 gene                                                                                                  | 3.17 |
| 1449036_at   | Rnf128                     | ring finger protein 128                                                                                                     | 3.17 |
| 1452158_at   | Eprs ///<br>LOC633677      | glutamyl-prolyl-tRNA synthetase /// similar to Bifunctional aminoacyl-tRNA synthetase                                       | 3.15 |
| 1437495_at   | LOC100047187 ///<br>Yy2    | similar to zinc finger, X-linked, duplicated B /// Yy2 transcription factor                                                 | 3.15 |
| 1420973_at   | Arid5b ///<br>LOC100044968 | AT rich interactive domain 5B (Mrf1 like) /// similar to modulator recognition factor 2                                     | 3.14 |
| 1428783_at   | Prkar2a                    | protein kinase, cAMP dependent regulatory, type II alpha                                                                    | 3.10 |
| 1439348_at   | S100a10                    | S100 calcium binding protein A10 (calpactin)                                                                                | 3.08 |
| 1418135_at   | Aff1                       | AF4/FMR2 family, member 1                                                                                                   | 3.07 |
| 1415844_at   | Syt4                       | synaptotagmin IV                                                                                                            | 3.06 |
| 1436659_at   | Dclk1                      | doublecortin-like kinase 1                                                                                                  | 3.04 |
| 1418666_at   | Ptx3                       | pentraxin related gene                                                                                                      | 3.02 |
| 1455247_at   | Amotl1                     | angiomin-like 1                                                                                                             | 3.02 |
| 1416226_at   | Arpc1b                     | actin related protein 2/3 complex, subunit 1B                                                                               | 3.01 |
| 1418071_s_at | Cdyl                       | chromodomain protein, Y chromosome-like                                                                                     | 3.00 |
| 1417562_at   | Eif4ebp1                   | eukaryotic translation initiation factor 4E binding protein 1                                                               | 2.99 |
| 1434585_at   | Tulp4                      | tubby like protein 4                                                                                                        | 2.97 |
| 1436866_at   | Efna5                      | ephrin A5                                                                                                                   | 2.96 |
| 1418492_at   | Grem2                      | gremlin 2 homolog, cysteine knot superfamily (Xenopus laevis)                                                               | 2.94 |
| 1449141_at   | Fblim1                     | filamin binding LIM protein 1                                                                                               | 2.93 |
| 1456381_x_at | Mcl1                       | myeloid cell leukemia sequence 1                                                                                            | 2.91 |
| 1440866_at   | Eif2ak2                    | eukaryotic translation initiation factor 2-alpha kinase 2                                                                   | 2.90 |

|              |                            |                                                                                                                                |      |
|--------------|----------------------------|--------------------------------------------------------------------------------------------------------------------------------|------|
| 1441823_at   | Zmiz1                      | zinc finger, MIZ-type containing 1                                                                                             | 2.88 |
| 1423465_at   | Frrs1 ///<br>LOC100046401  | ferric-chelate reductase 1 /// similar to SDR2                                                                                 | 2.85 |
| 1435701_at   | ---                        | 13 days embryo lung cDNA, RIKEN full-length enriched library, clone:D430017B04<br>product:unclassifiable, full insert sequence | 2.84 |
| 1451201_s_at | Rnh1                       | ribonuclease/angiogenin inhibitor 1                                                                                            | 2.84 |
| 1438725_at   | Med13                      | mediator complex subunit 13                                                                                                    | 2.84 |
| 1448503_at   | LOC632101 ///<br>Mcl1      | myeloid cell leukemia sequence 1 /// similar to myeloid cell leukemia sequence 1                                               | 2.80 |
| 1441081_a_at | 1110038B12Rik              | RIKEN cDNA 1110038B12 gene                                                                                                     | 2.80 |
| 1447868_x_at | Glrx3 ///<br>LOC620016     | glutaredoxin 3 /// similar to thioredoxin-like 2                                                                               | 2.79 |
| 1456397_at   | Cdh4                       | cadherin 4                                                                                                                     | 2.79 |
| 1421530_a_at | Grm8                       | glutamate receptor, metabotropic 8                                                                                             | 2.78 |
| 1424065_at   | Edem1                      | ER degradation enhancer, mannosidase alpha-like 1                                                                              | 2.78 |
| 1428942_at   | Mt2                        | metallothionein 2                                                                                                              | 2.78 |
| 1422573_at   | Ampd3                      | AMP deaminase 3                                                                                                                | 2.78 |
| 1416700_at   | Rnd3                       | Rho family GTPase 3                                                                                                            | 2.77 |
| 1451065_a_at | Ddx39                      | DEAD (Asp-Glu-Ala-Asp) box polypeptide 39                                                                                      | 2.75 |
| 1423903_at   | Pvr                        | poliovirus receptor                                                                                                            | 2.75 |
| 1459170_at   | ---                        | ---                                                                                                                            | 2.75 |
| 1425719_a_at | Nmi                        | N-myc (and STAT) interactor                                                                                                    | 2.75 |
| 1419573_a_at | Lgals1                     | lectin, galactose binding, soluble 1                                                                                           | 2.73 |
| 1449360_at   | Csf2rb2                    | colony stimulating factor 2 receptor, beta 2, low-affinity (granulocyte-macrophage)                                            | 2.73 |
| 1422045_a_at | Ptpn12                     | protein tyrosine phosphatase, non-receptor type 12                                                                             | 2.72 |
| 1416303_at   | Litaf                      | LPS-induced TN factor                                                                                                          | 2.72 |
| 1421392_a_at | Birc3                      | baculoviral IAP repeat-containing 3                                                                                            | 2.68 |
| 1439434_x_at | Sh2d5                      | SH2 domain containing 5                                                                                                        | 2.68 |
| 1419248_at   | Rgs2                       | regulator of G-protein signaling 2                                                                                             | 2.68 |
| 1418825_at   | Irgm                       | immunity-related GTPase family, M                                                                                              | 2.68 |
| 1452157_at   | Eprs ///<br>LOC633677      | glutamyl-prolyl-tRNA synthetase /// similar to Bifunctional aminoacyl-tRNA synthetase                                          | 2.67 |
| 1438168_x_at | Ddx39                      | DEAD (Asp-Glu-Ala-Asp) box polypeptide 39                                                                                      | 2.66 |
| 1433696_at   | Hn1l                       | hematological and neurological expressed 1-like                                                                                | 2.65 |
| 1419247_at   | Rgs2                       | regulator of G-protein signaling 2                                                                                             | 2.65 |
| 1448558_a_at | Pla2g4a                    | phospholipase A2, group IVA (cytosolic, calcium-dependent)                                                                     | 2.65 |
| 1424229_at   | Dyrk3                      | dual-specificity tyrosine-(Y)-phosphorylation regulated kinase 3                                                               | 2.64 |
| 1418397_at   | Zfp275                     | zinc finger protein 275                                                                                                        | 2.63 |
| 1423254_x_at | Rps27l                     | ribosomal protein S27-like                                                                                                     | 2.63 |
| 1426912_at   | EG621205 ///<br>Rfwd2      | ring finger and WD repeat domain 2 /// predicted gene, EG621205                                                                | 2.63 |
| 1436202_at   | ---                        | ---                                                                                                                            | 2.63 |
| 1442308_at   | Smyd4                      | SET and MYND domain containing 4                                                                                               | 2.63 |
| 1455814_x_at | Ddx39                      | DEAD (Asp-Glu-Ala-Asp) box polypeptide 39                                                                                      | 2.63 |
| 1417351_a_at | LOC100047155 ///<br>Snrpa1 | small nuclear ribonucleoprotein polypeptide A' /// similar to Small nuclear ribonucleoprotein polypeptide A                    | 2.63 |
| 1460694_s_at | Svil                       | supervillin                                                                                                                    | 2.62 |

|              |                          |                                                                                               |      |
|--------------|--------------------------|-----------------------------------------------------------------------------------------------|------|
| 1458802_at   | Hivep3                   | human immunodeficiency virus type I enhancer binding protein 3                                | 2.61 |
| 1438606_a_at | Clic4                    | chloride intracellular channel 4 (mitochondrial)                                              | 2.60 |
| 1460603_at   | Samd9l                   | sterile alpha motif domain containing 9-like                                                  | 2.59 |
| 1450767_at   | Nedd9                    | neural precursor cell expressed, developmentally down-regulated gene 9                        | 2.56 |
| 1435176_a_at | Id2                      | inhibitor of DNA binding 2                                                                    | 2.56 |
| 1447585_s_at | Mrps6                    | mitochondrial ribosomal protein S6                                                            | 2.53 |
| 1422818_at   | Nedd9                    | neural precursor cell expressed, developmentally down-regulated gene 9                        | 2.49 |
| 1451264_at   | Frmd6                    | FERM domain containing 6                                                                      | 2.49 |
| 1417719_at   | Sap30                    | sin3 associated polypeptide                                                                   | 2.49 |
| 1423393_at   | Clic4                    | chloride intracellular channel 4 (mitochondrial)                                              | 2.49 |
| 1436100_at   | Sh2d5                    | SH2 domain containing 5                                                                       | 2.49 |
| 1418637_at   | Etv3 ///<br>LOC100045950 | ets variant gene 3 /// similar to ets variant gene 3                                          | 2.48 |
| 1452283_at   | Rassf8                   | Ras association (RalGDS/AF-6) domain family 8                                                 | 2.48 |
| 1416881_at   | LOC632101 ///<br>Mcl1    | myeloid cell leukemia sequence 1 /// similar to myeloid cell leukemia sequence 1              | 2.47 |
| 1451941_a_at | Fcgr2b                   | Fc receptor, IgG, low affinity IIb                                                            | 2.47 |
| 1455396_at   | Atp8b1                   | ATPase, class I, type 8B, member 1                                                            | 2.46 |
| 1426708_at   | Antxr2                   | anthrax toxin receptor 2                                                                      | 2.43 |
| 1443036_at   | Zfp804a                  | zinc finger protein 804A                                                                      | 2.43 |
| 1447703_x_at | Zfp593                   | zinc finger protein 593                                                                       | 2.42 |
| 1437785_at   | Adamts9                  | a disintegrin-like and metallopeptidase (reprolysin type) with thrombospondin type 1 motif, 9 | 2.42 |
| 1422506_a_at | Cstb                     | cystatin B                                                                                    | 2.41 |
| 1454992_at   | Slc7a1                   | solute carrier family 7 (cationic amino acid transporter, y+ system), member 1                | 2.40 |
| 1424552_at   | Casp8                    | caspase 8                                                                                     | 2.37 |
| 1448797_at   | Elk3                     | ELK3, member of ETS oncogene family                                                           | 2.37 |
| 1437318_at   | Pak3                     | p21 (CDKN1A)-activated kinase 3                                                               | 2.37 |
| 1452192_at   | BC053440                 | cDNA sequence BC053440                                                                        | 2.36 |
| 1437236_a_at | Zfp110                   | zinc finger protein 110                                                                       | 2.35 |
| 1451208_at   | Etf1                     | eukaryotic translation termination factor 1                                                   | 2.35 |
| 1435429_x_at | Rps27l                   | ribosomal protein S27-like                                                                    | 2.35 |
| 1447804_x_at | BC031781                 | CDNA sequence BC031781                                                                        | 2.33 |
| 1423643_at   | Ddx39                    | DEAD (Asp-Glu-Ala-Asp) box polypeptide 39                                                     | 2.31 |
| 1437111_at   | Zc3h12c                  | zinc finger CCCH type containing 12C                                                          | 2.30 |
| 1416066_at   | Cd9                      | CD9 antigen                                                                                   | 2.30 |
| 1423948_at   | Bag2                     | Bcl2-associated athanogene 2                                                                  | 2.29 |
| 1418822_a_at | Arf6                     | ADP-ribosylation factor 6                                                                     | 2.28 |
| 1424769_s_at | Cald1                    | caldesmon 1                                                                                   | 2.28 |
| 1437237_x_at | Zfp110                   | zinc finger protein 110                                                                       | 2.28 |
| 1452759_s_at | Ppfbp1                   | PTPRF interacting protein, binding protein 1 (liprin beta 1)                                  | 2.27 |
| 1449049_at   | Tlr1                     | toll-like receptor 1                                                                          | 2.27 |
| 1423431_a_at | Mybbp1a                  | MYB binding protein (P160) 1a                                                                 | 2.25 |
| 1449674_s_at | Pdcd6ip                  | programmed cell death 6 interacting protein                                                   | 2.24 |
| 1450925_a_at | Rps27l                   | ribosomal protein S27-like                                                                    | 2.24 |
| 1439740_s_at | Uck2                     | uridine-cytidine kinase 2                                                                     | 2.23 |
| 1437807_x_at | Ctnna1                   | catenin (cadherin associated protein), alpha 1                                                | 2.23 |
| 1428011_a_at | Erbp2ip                  | Erbp2 interacting protein                                                                     | 2.22 |
| 1430357_at   | H3f3b                    | H3 histone, family 3B                                                                         | 2.22 |

|              |               |                                                                               |      |
|--------------|---------------|-------------------------------------------------------------------------------|------|
| 1424594_at   | Lgals7        | lectin, galactose binding, soluble 7                                          | 2.22 |
| 1455439_a_at | Lgals1        | lectin, galactose binding, soluble 1                                          | 2.21 |
| 1424440_at   | Mrps6         | mitochondrial ribosomal protein S6                                            | 2.21 |
| 1450744_at   | Ell2          | elongation factor RNA polymerase II 2                                         | 2.20 |
| 1433768_at   | Palld         | palladin, cytoskeletal associated protein                                     | 2.20 |
| 1436444_at   | 6030405A18Rik | RIKEN cDNA 6030405A18 gene                                                    | 2.20 |
| 1460735_at   | Svil          | supervillin                                                                   | 2.19 |
| 1433944_at   | Hectd2        | HECT domain containing 2                                                      | 2.19 |
| 1435402_at   | Gramd1b       | GRAM domain containing 1B                                                     | 2.18 |
| 1424290_at   | Osgin2        | oxidative stress induced growth inhibitor family member 2                     | 2.18 |
| 1423596_at   | Nek6          | NIMA (never in mitosis gene a)-related expressed kinase 6                     | 2.17 |
| 1436996_x_at | Lyz           | lysozyme                                                                      | 2.17 |
| 1447669_s_at | Gng4          | guanine nucleotide binding protein (G protein), gamma 4 subunit               | 2.16 |
| 1416382_at   | Ctsc          | cathepsin C                                                                   | 2.16 |
| 1450478_a_at | Ptpn12        | protein tyrosine phosphatase, non-receptor type 12                            | 2.16 |
| 1448306_at   | Nfkbia        | nuclear factor of kappa light chain gene enhancer in B-cells inhibitor, alpha | 2.16 |
| 1435551_at   | Fhod3         | formin homology 2 domain containing 3                                         | 2.15 |
| 1428094_at   | Lamp2         | lysosomal-associated membrane protein 2                                       | 2.15 |
| 1434510_at   | Papss2        | 3'-phosphoadenosine 5'-phosphosulfate synthase 2                              | 2.15 |
| 1460556_at   | ---           | ---                                                                           | 2.15 |
| 1435091_at   | Zfp568        | zinc finger protein 568                                                       | 2.15 |
| 1453782_at   | 3021401C12Rik | RIKEN cDNA 3021401C12 gene                                                    | 2.13 |
| 1449090_a_at | Yes1          | Yamaguchi sarcoma viral (v-yes) oncogene homolog 1                            | 2.13 |
| 1417165_at   | Mbd2          | methyl-CpG binding domain protein 2                                           | 2.13 |
| 1428315_at   | Ebna1bp2      | EBNA1 binding protein 2                                                       | 2.11 |
| 1448149_at   | Ctnna1        | catenin (cadherin associated protein), alpha 1                                | 2.11 |
| 1423566_a_at | Hsp110        | heat shock protein 110                                                        | 2.10 |
| 1431394_a_at | Lrrk2         | leucine-rich repeat kinase 2                                                  | 2.10 |
| 1455039_a_at | Sin3b         | transcriptional regulator, SIN3B (yeast)                                      | 2.10 |
| 1434424_at   | Flvcr1        | feline leukemia virus subgroup C cellular receptor 1                          | 2.09 |
| 1423796_at   | LOC100045887  | similar to PTB-associated splicing factor                                     | 2.09 |
| 1422808_s_at | Dock2         | dedicator of cyto-kinesis 2                                                   | 2.08 |
| 1455897_x_at | Hmgn1         | high mobility group nucleosomal binding domain 1                              | 2.08 |
| 1436684_a_at | Riok2         | RIO kinase 2 (yeast)                                                          | 2.08 |
| 1438579_at   | Utp14b        | UTP14, U3 small nucleolar ribonucleoprotein, homolog B (yeast)                | 2.07 |
| 1427072_at   | Stard8        | START domain containing 8                                                     | 2.07 |
| 1419272_at   | Myd88         | myeloid differentiation primary response gene 88                              | 2.07 |
| 1416257_at   | Capn2         | calpain 2                                                                     | 2.06 |
| 1436506_a_at | Snhg6         | small nucleolar RNA host gene (non-protein coding) 6                          | 2.06 |
| 1437726_x_at | C1qb          | complement component 1, q subcomponent, beta polypeptide                      | 2.06 |
| 1450899_at   | Nedd1         | neural precursor cell expressed, developmentally down-regulated gene 1        | 2.06 |

|              |                        |                                                                                                                                           |       |
|--------------|------------------------|-------------------------------------------------------------------------------------------------------------------------------------------|-------|
| 1438750_at   | Atrx                   | Alpha thalassemia/mental retardation syndrome X-linked homolog (human)                                                                    | 2.06  |
| 1447757_x_at | Inpp5f                 | inositol polyphosphate-5-phosphatase F                                                                                                    | 2.05  |
| 1460632_at   | ---                    | Transcribed locus                                                                                                                         | 2.05  |
| 1448802_at   | Nufip1                 | nuclear fragile X mental retardation protein interacting protein 1                                                                        | 2.05  |
| 1416312_at   | Rars                   | arginyl-tRNA synthetase                                                                                                                   | 2.05  |
| 1424244_at   | Rwdd4a                 | RWD domain containing 4A                                                                                                                  | 2.04  |
| 1442793_s_at | LOC100046166 /// Tbrg4 | transforming growth factor beta regulated gene 4 /// similar to Transforming growth factor beta regulated gene 4                          | 2.04  |
| 1417116_at   | Slc6a8                 | solute carrier family 6 (neurotransmitter transporter, creatine), member 8                                                                | 2.04  |
| 1435655_at   | Snora65                | small nucleolar RNA, H/ACA box 65                                                                                                         | 2.04  |
| 1428919_at   | Fgfr1op                | Fgfr1 oncogene partner                                                                                                                    | 2.04  |
| 1446835_at   | ---                    | ---                                                                                                                                       | 2.03  |
| 1419749_at   | Trdmt1                 | tRNA aspartic acid methyltransferase 1                                                                                                    | 2.02  |
| 1456093_at   | Zfp536                 | zinc finger protein 536                                                                                                                   | 2.02  |
| 1448968_at   | Ubfd1                  | ubiquitin family domain containing 1                                                                                                      | 2.02  |
| 1428078_at   | 0610013E23Rik          | RIKEN cDNA 0610013E23 gene                                                                                                                | 2.00  |
| 1441716_at   | ---                    | 12 days embryo eyeball cDNA, RIKEN full-length enriched library, clone:D230024G22<br>product:unclassifiable, full insert sequence         | -2.00 |
| 1456900_at   | ---                    | ---                                                                                                                                       | -2.01 |
| 1455883_a_at | Lrrtm1                 | leucine rich repeat transmembrane neuronal 1                                                                                              | -2.02 |
| 1428156_at   | Gng2                   | guanine nucleotide binding protein (G protein), gamma 2 subunit                                                                           | -2.04 |
| 1426729_at   | 2900046G09Rik          | RIKEN cDNA 2900046G09 gene                                                                                                                | -2.07 |
| 1420925_at   | Tub                    | tubby candidate gene                                                                                                                      | -2.08 |
| 1447992_s_at | Pcsk2                  | proprotein convertase subtilisin/kexin type 2                                                                                             | -2.08 |
| 1425987_a_at | Kcnma1                 | potassium large conductance calcium-activated channel, subfamily M, alpha member 1                                                        | -2.09 |
| 1449376_at   | Nicn1                  | nicolin 1                                                                                                                                 | -2.10 |
| 1426616_at   | Tlcd1                  | TLC domain containing 1                                                                                                                   | -2.10 |
| 1429021_at   | Epha4                  | Eph receptor A4                                                                                                                           | -2.11 |
| 1420871_at   | Gucy1b3                | guanylate cyclase 1, soluble, beta 3                                                                                                      | -2.11 |
| 1455082_at   | Cblb                   | Casitas B-lineage lymphoma b                                                                                                              | -2.12 |
| 1448411_at   | Wfs1                   | Wolfram syndrome 1 homolog (human)                                                                                                        | -2.13 |
| 1445837_at   | ---                    | 12 days embryo spinal ganglion cDNA, RIKEN full-length enriched library, clone:D130073P12<br>product:unclassifiable, full insert sequence | -2.14 |
| 1458697_at   | ---                    | Transcribed locus                                                                                                                         | -2.18 |
| 1450770_at   | 3632451O06Rik          | RIKEN cDNA 3632451O06 gene                                                                                                                | -2.18 |
| 1435668_at   | 4932442K08Rik          | RIKEN cDNA 4932442K08 gene                                                                                                                | -2.19 |
| 1449620_s_at | D16Wsu65e              | DNA segment, Chr 16, Wayne State University 65, expressed                                                                                 | -2.20 |
| 1458421_at   | Kcnq3                  | potassium voltage-gated channel, subfamily Q, member 3                                                                                    | -2.21 |
| 1453836_a_at | Mgll                   | monoglyceride lipase                                                                                                                      | -2.21 |
| 1420537_at   | Kctd4                  | potassium channel tetramerisation domain containing 4                                                                                     | -2.24 |
| 1436493_at   | BB181834               | expressed sequence BB181834                                                                                                               | -2.25 |
| 1457587_at   | Kcnq5                  | potassium voltage-gated channel, subfamily Q, member 5                                                                                    | -2.31 |
| 1440343_at   | Rps6ka5                | ribosomal protein S6 kinase, polypeptide 5                                                                                                | -2.33 |



|              |                                                 |                                                                                                                                             |       |
|--------------|-------------------------------------------------|---------------------------------------------------------------------------------------------------------------------------------------------|-------|
| 1432027_a_at | LOC100044325 ///<br>LOC100045928 ///<br>Tbc1d14 | TBC1 domain family, member 14 /// similar to<br>mKIAA1322 protein /// similar to TBC1 domain<br>family, member 14                           | -2.35 |
| 1430237_at   | Cldn22                                          | claudin 22                                                                                                                                  | -2.35 |
| 1454721_at   | 1110018G07Rik                                   | RIKEN cDNA 1110018G07 gene                                                                                                                  | -2.36 |
| 1436532_at   | Dclk3                                           | doublecortin-like kinase 3                                                                                                                  | -2.38 |
| 1459971_at   | ---                                             | Transcribed locus                                                                                                                           | -2.39 |
| 1431569_a_at | Lypd1                                           | Ly6/Plaur domain containing 1                                                                                                               | -2.41 |
| 1439870_at   | A330008L17Rik                                   | RIKEN cDNA A330008L17 gene                                                                                                                  | -2.41 |
| 1427281_at   | Scn2a1                                          | sodium channel, voltage-gated, type II, alpha 1                                                                                             | -2.42 |
| 1420191_s_at | Tmem191c                                        | transmembrane protein 191C                                                                                                                  | -2.46 |
| 1416702_at   | Serpini1                                        | serine (or cysteine) peptidase inhibitor, clade I,<br>member 1                                                                              | -2.48 |
| 1460286_at   |                                                 | 6-Sep septin 6                                                                                                                              | -2.49 |
| 1433681_x_at | Capn3                                           | calpain 3                                                                                                                                   | -2.51 |
| 1428813_a_at | Drd1ip                                          | dopamine receptor D1 interacting protein                                                                                                    | -2.51 |
| 1435033_at   | Arhgef4                                         | Rho guanine nucleotide exchange factor (GEF) 4                                                                                              | -2.53 |
| 1422052_at   | Cdh8                                            | cadherin 8                                                                                                                                  | -2.54 |
| 1450930_at   | Hpca                                            | hippocalcin                                                                                                                                 | -2.55 |
| 1417664_a_at | Ndr3g3                                          | N-myc downstream regulated gene 3                                                                                                           | -2.55 |
| 1435407_at   | ---                                             | Adult male medulla oblongata cDNA, RIKEN full-<br>length enriched library, clone:6332404K23<br>product:unclassifiable, full insert sequence | -2.58 |
| 1434581_at   | ---                                             | ---                                                                                                                                         | -2.60 |
| 1434454_at   | D16Wsu65e                                       | DNA segment, Chr 16, Wayne State University<br>65, expressed                                                                                | -2.69 |
| 1444723_at   | 6530418L21Rik                                   | RIKEN cDNA 6530418L21 gene                                                                                                                  | -2.69 |
| 1451499_at   | Cadps2                                          | Ca <sup>2+</sup> -dependent activator protein for secretion 2                                                                               | -2.75 |
| 1449429_at   | Fkbp1b                                          | FK506 binding protein 1b                                                                                                                    | -2.77 |
| 1452332_at   | Ccdc85a                                         | coiled-coil domain containing 85A                                                                                                           | -2.77 |
| 1439904_at   | Fstl5                                           | follistatin-like 5                                                                                                                          | -2.81 |
| 1456765_at   | 6430511F03                                      | hypothetical protein 6430511F03                                                                                                             | -2.81 |
| 1449468_at   | St6galnac5                                      | ST6 (alpha-N-acetylneuraminyl-2,3-beta-<br>galactosyl-1,3)-N-acetylgalactosaminide alpha-2,6-<br>sialyltransferase 5                        | -2.83 |
| 1446265_at   | Dnm3                                            | dynamamin 3                                                                                                                                 | -2.86 |
| 1451583_a_at | BC025076                                        | cDNA sequence BC025076                                                                                                                      | -2.88 |
| 1420876_a_at |                                                 | 6-Sep septin 6                                                                                                                              | -2.90 |
| 1438540_at   | Col25a1                                         | collagen, type XXV, alpha 1                                                                                                                 | -2.99 |
| 1419332_at   | Egfl6                                           | EGF-like-domain, multiple 6                                                                                                                 | -3.00 |
| 1451894_a_at | Scn8a                                           | sodium channel, voltage-gated, type VIII, alpha                                                                                             | -3.01 |
| 1417312_at   | Dkk3                                            | dickkopf homolog 3 ( <i>Xenopus laevis</i> )                                                                                                | -3.02 |
| 1425834_a_at | Gpam                                            | glycerol-3-phosphate acyltransferase,<br>mitochondrial                                                                                      | -3.03 |
| 1440545_at   | ENSMUSG00000<br>075319                          | predicted gene, ENSMUSG00000075319                                                                                                          | -3.04 |
| 1454043_a_at | Kcnab1                                          | potassium voltage-gated channel, shaker-related<br>subfamily, beta member 1                                                                 | -3.04 |
| 1445691_at   | Chn1                                            | chimerin (chimaerin) 1                                                                                                                      | -3.10 |
| 1436142_at   | Akap5                                           | A kinase (PRKA) anchor protein 5                                                                                                            | -3.13 |
| 1455145_at   | Pcdh19                                          | protocadherin 19                                                                                                                            | -3.19 |
| 1433469_at   | Lrrn2                                           | leucine rich repeat protein 2, neuronal                                                                                                     | -3.29 |
| 1438784_at   | Bcl11b                                          | B-cell leukemia/lymphoma 11B                                                                                                                | -3.30 |

|              |                    |                                                       |       |
|--------------|--------------------|-------------------------------------------------------|-------|
| 1418683_at   | Lin7b              | lin-7 homolog B ( <i>C. elegans</i> )                 | -3.35 |
| 1438710_at   | Htr1a              | 5-hydroxytryptamine (serotonin) receptor 1A           | -3.41 |
| 1429443_at   | Cpne4              | copine IV                                             | -3.46 |
| 1425574_at   | Epha3              | Eph receptor A3                                       | -3.48 |
| 1449172_a_at | Lin7b              | lin-7 homolog B ( <i>C. elegans</i> )                 | -3.49 |
| 1454653_at   | Cpne9              | copine family member IX                               | -3.51 |
| 1440534_at   | ENSMUSG00000056615 | predicted gene, ENSMUSG00000056615                    | -3.60 |
| 1441801_at   | Kctd4              | potassium channel tetramerisation domain containing 4 | -3.62 |
| 1418047_at   | Neurod6            | neurogenic differentiation 6                          | -3.82 |
| 1418082_at   | LOC100045684       | similar to N-myristoyltransferase 1                   | -4.20 |
| 1425833_a_at | Hpca               | hippocalcin                                           | -4.45 |
| 1432385_a_at | Agtpbp1            | ATP/GTP binding protein 1                             | -4.57 |
| 1419250_a_at | Pftk1              | PFTAIRE protein kinase 1                              | -4.96 |
| 1420563_at   | Gria3              | glutamate receptor, ionotropic, AMPA3 (alpha 3)       | -5.00 |
| 1431717_at   | Akap5              | A kinase (PRKA) anchor protein 5                      | -5.38 |
| 1426328_a_at | Scn3b              | sodium channel, voltage-gated, type III, beta         | -5.71 |
| 1450143_at   | Rasgrp1            | RAS guanyl releasing protein 1                        | -6.28 |
| 1451800_at   | Gcc2               | GRIP and coiled-coil domain containing 2              | -6.83 |
| 1442272_at   | 1700021K10Rik      | RIKEN cDNA 1700021K10 gene                            | -7.60 |
| 1458363_at   | Zdhc17             | zinc finger, DHHC domain containing 17                | -7.70 |
| 1445858_at   | 4933439G19Rik      | RIKEN cDNA 4933439G19 gene                            | -8.71 |

---
