# Supplementary material for: Glial responses during epileptogenesis in Mus musculus point to potential therapeutic targets
Source: PubMed Central journal article supplement (PMC6095496; doi:10.1371/journal.pone.0201742), 2018-08-16
Supplement: pone.0201742.s008.pdf [file pone.0201742.s008.pdf]

**Table S4:** qRT-PCR validation of selected microarray statistically significant gene expression changes in KA-versus saline-injected hippocampi, with reference to Gapdh. (n/c: not changed)

| Gene Symbol | 6 hours     |             |                    | 12 hours    |             |                    |
|-------------|-------------|-------------|--------------------|-------------|-------------|--------------------|
|             | Microarrays | qRT-PCR     |                    | Microarrays | qRT-PCR     |                    |
|             | Fold Change | Fold Change | Standard Deviation | Fold Change | Fold Change | Standard Deviation |
| Bdnf        | 6.1         | 16.58       | 0.37               | 4.02        | 4.70        | 0.12               |
| Casp8       | n/c         | n/c         | -                  | n/c         | 2.67        | 0.05               |
| Fos         | 12.2        | 40.52       | 3.55               | 17.00       | 59.64       | 2.67               |
| Hspa1b      | n/c         | 87.28       | 5.41               | 2.72        | 11.66       | 0.69               |
| Nos3        | n/c         | 3.85        | 0.04               | 15.56       | 5.40        | 0.28               |
| Tnfrs1a     | n/c         | 4.10        | 0.08               | 2.35        | n/c         | -                  |
