# Supplementary material for: Glial responses during epileptogenesis in Mus musculus point to potential therapeutic targets
Source: PubMed Central journal article supplement (PMC6095496; doi:10.1371/journal.pone.0201742), 2018-08-16
Supplement: pone.0201742.s009.pdf [file pone.0201742.s009.pdf]

**Table S5:** Significantly changed GO Biological Processes (level 6) at 6 hours post KA treatment, using the "Mapping to ontologies (TRANSPATH®)" workflow. All significantly changed genes at 6h were considered, and a threshold of p-value <0.05 was applied.

| Gene Ontology Category ID | GO-Biologic Process (level 6)                                  | Time point(s) of enrichment | Number of significantly changed genes at 6h | Symbol of significantly changed genes at 6h                                                                                                                                                                                                                                                                                                                                                                                                                                                                   |
|---------------------------|----------------------------------------------------------------|-----------------------------|---------------------------------------------|---------------------------------------------------------------------------------------------------------------------------------------------------------------------------------------------------------------------------------------------------------------------------------------------------------------------------------------------------------------------------------------------------------------------------------------------------------------------------------------------------------------|
| GO:0031326                | regulation of cellular biosynthetic process                    | 6h, 12h, 24h                | 66                                          | 4933421E11Rik, Arhgef2, Arpp19, Atf7ip (ENSMUSG00000053935), Avpr1a, Bach2, Baz1a, Bcl11b, Bcl7a, Casc3, Cdkn1a, Cited2, Crem, Csrnp1, Cyr61, Dhx33, Dusp5, E2f3, Egr4, Ell2, Elp2, Fos, Fosb, Foxk1, Foxp1, Hbegf, Hcfc2, Htr1a, Jun, Junb, Kdm4b, Kdm6b, Kitl, Mcf2l, Mterfd3, Neurod2, Neurod6, Nfkbiz, Npas4, Nr3c2, Nr4a1, Nr4a2, Nr4a3, Nrip2, P2ry12, Pdk4, Per1, Plagl1, Ptgs2, Rcan1, Rcor2, Rgs2, Rorb, Sap18, Sap30, Setd1b, Smad7, Tfdp2, Tinf2, Wnt2, Zeb2, Zfp12, Zfp128, Zfp292, Zfp36, Zfp462 |
| GO:0019219                | regulation of nucleobase-containing compound metabolic process | 6h, 12h, 24h                | 64                                          | 4933421E11Rik, Arhgef2, Atf7ip (ENSMUSG00000053935), Bach2, Bag4, Baz1a, Bcl11b, Bcl7a, Cdkn1a, Cited2, Crem, Csrnp1, Cyr61, Dhx33, Dusp5, E2f3, Egr4, Ell2, Elp2, Errfi1, Fos, Fosb, Foxk1, Foxp1, Hcfc2, Htr1a, Jun, Junb, Kdm4b, Kdm6b, Kitl, Mcf2l, Mterfd3, Neurod2, Neurod6, Nfkbiz, Npas4, Nr3c2, Nr4a1, Nr4a2, Nr4a3, Nrip2, P2ry12, Per1, Plagl1, Ptbp2, Rcan1, Rcor2, Rgs2, Rorb, Sap18, Sap30, Setd1b, Smad7, Srsf12, Tfdp2, Tinf2, Wnt2, Zeb2, Zfp12, Zfp128, Zfp292, Zfp36, Zfp462               |

|            |                                                  |              |    |                                                                                                                                                                                                                                                                                                                                                                                                                                                                   |
|------------|--------------------------------------------------|--------------|----|-------------------------------------------------------------------------------------------------------------------------------------------------------------------------------------------------------------------------------------------------------------------------------------------------------------------------------------------------------------------------------------------------------------------------------------------------------------------|
| GO:0010556 | regulation of macromolecule biosynthetic process | 6h, 12h, 24h | 60 | 4933421E11Rik, Arhgef2, Atf7ip (ENSMUSG00000053935), Bach2, Baz1a, Bcl11b, Bcl7a, Casc3, Cdkn1a, Cited2, Crem, Csrnp1, Cyr61, Dhx33, Dusp5, E2f3, Egr4, Eil2, Elp2, Fos, Fosb, Foxk1, Foxp1, Hbegf, Hcfc2, Jun, Junb, Kdm4b, Kdm6b, Kitl, Mcf2l, Mterfd3, Neurod2, Neurod6, Nfkbiz, Npas4, Nr3c2, Nr4a1, Nr4a2, Nr4a3, Nrip2, Per1, Plagl1, Rcan1, Rcor2, Rgs2, Rorb, Sap18, Sap30, Setd1b, Smad7, Tfdp2, Tinf2, Wnt2, Zeb2, Zfp12, Zfp128, Zfp292, Zfp36, Zfp462 |
| GO:0010468 | regulation of gene expression                    | 6h, 12h, 24h | 59 | 4933421E11Rik, Arhgef2, Atf7ip (ENSMUSG00000053935), Bach2, Baz1a, Bcl11b, Bcl7a, Casc3, Cdkn1a, Cited2, Crem, Csrnp1, Cyr61, Dhx33, Dusp5, E2f3, Egr4, Eil2, Elp2, Fos, Fosb, Foxk1, Foxp1, Hcfc2, Jun, Junb, Kdm4b, Kdm6b, Mcf2l, Mterfd3, Neurod2, Neurod6, Nfkbiz, Npas4, Nr3c2, Nr4a1, Nr4a2, Nr4a3, Nrip2, Per1, Plagl1, Ptbp2, Rcan1, Rcor2, Rgs2, Rorb, Sap18, Sap30, Setd1b, Smad7, Srsf12, Tfdp2, Wnt2, Zeb2, Zfp12, Zfp128, Zfp292, Zfp36, Zfp462      |
| GO:0051252 | regulation of RNA metabolic process              | 6h, 12h, 24h | 57 | 4933421E11Rik, Arhgef2, Atf7ip (ENSMUSG00000053935), Bach2, Bag4, Baz1a, Bcl11b, Bcl7a, Cited2, Crem, Csrnp1, Cyr61, Dhx33, Dusp5, E2f3, Egr4, Eil2, Elp2, Fos, Fosb, Foxk1, Foxp1, Hcfc2, Jun, Junb, Kdm4b, Kdm6b, Mcf2l, Mterfd3, Neurod2, Neurod6, Nfkbiz, Npas4, Nr3c2, Nr4a1, Nr4a2, Nr4a3, Nrip2, Per1, Plagl1, Ptbp2, Rcan1, Rcor2, Rorb, Sap18, Sap30, Setd1b, Smad7, Srsf12, Tfdp2, Wnt2, Zeb2, Zfp12, Zfp128, Zfp292, Zfp36, Zfp462                     |

|            |                                                                           |              |    |                                                                                                                                                                                                                                                                                                                                |
|------------|---------------------------------------------------------------------------|--------------|----|--------------------------------------------------------------------------------------------------------------------------------------------------------------------------------------------------------------------------------------------------------------------------------------------------------------------------------|
| GO:0006351 | transcription,<br>DNA-<br>dependent                                       | 6h, 12h      | 38 | 4933421E11Rik, Atf7ip<br>(ENSMUSG00000053935), Bach2,<br>Baz1a, Bcl11b, Crem, Csrnp1,<br>E2f3, Egr4, Ell2, Elp2, Fos, Fosb,<br>Foxk1, Foxp1, Jun, Junb, Kdm4b,<br>Mterfd3, Neurod2, Neurod6, Nfkbiz,<br>Npas4, Nr3c2, Nr4a1, Nr4a2,<br>Nr4a3, Nrip2, Per1, Rcor2, Rorb,<br>Sap30, Setd1b, Smad7, Tfdp2,<br>Zeb2, Zfp12, Zfp292 |
| GO:0031325 | positive<br>regulation of<br>cellular<br>metabolic<br>process             | 6h, 12h, 24h | 33 | Arpp19, Atf7ip<br>(ENSMUSG00000053935), Avpr1a,<br>Bag4, Bcl11b, Cdkn1a, Cited2,<br>Csrnp1, Cyr61, Dhx33, E2f3, Egr4,<br>Ell2, Fos, Foxk1, Foxp1, Jun, Junb,<br>Kitl, Mcf2l, Npas4, Nr4a1, Nr4a2,<br>Nr4a3, Plagl1, Ptgs2, Rorb, Smad7,<br>Tinf2, Wnt2, Zfp292, Zfp36, Zfp462                                                  |
| GO:0010604 | positive<br>regulation of<br>macromolecule<br>metabolic                   | 6h, 12h, 24h | 31 | Atf7ip (ENSMUSG00000053935),<br>Avpr1a, Bag4, Bcl11b, Cdkn1a,<br>Cited2, Csrnp1, Cyr61, Dhx33,<br>E2f3, Egr4, Ell2, Fos, Foxk1,                                                                                                                                                                                                |
| GO:0031324 | negative<br>regulation of<br>cellular<br>metabolic<br>process             | 6h, 12h, 24h | 30 | Atf7ip (ENSMUSG00000053935),<br>Bag4, Bcl7a, Cdkn1a, Cited2,<br>Dusp5, Errfi1, Fosb, Foxk1, Foxp1,<br>Hbegf, Hcfc2, Htr1a, Jun, Kdm6b,<br>Nrip2, P2ry12, Per1, Ptbp2, Ptpn3,<br>Rcor2, Sap30, Sh3bp5, Smad7,<br>Srsf12, Tinf2, Wnt2, Zfp12, Zfp128,<br>Zfp36                                                                   |
| GO:0009891 | positive<br>regulation of<br>biosynthetic<br>process                      | 6h, 12h, 24h | 29 | Arpp19, Atf7ip<br>(ENSMUSG00000053935), Avpr1a,<br>Bcl11b, Cited2, Csrnp1, Cyr61,<br>Dhx33, E2f3, Egr4, Ell2, Fos,<br>Foxk1, Foxp1, Jun, Junb, Kitl,<br>Mcf2l, Npas4, Nr4a1, Nr4a2, Nr4a3,<br>Plagl1, Ptgs2, Rorb, Wnt2, Zfp292,<br>Zfp36, Zfp462                                                                              |
| GO:0051173 | positive<br>regulation of<br>nitrogen<br>compound<br>metabolic<br>process | 6h, 12h, 24h | 28 | Atf7ip (ENSMUSG00000053935),<br>Bcl11b, Cited2, Csrnp1, Cyr61,<br>Dhx33, E2f3, Egr4, Ell2, Fos,<br>Foxk1, Foxp1, Jun, Junb, Kitl,<br>Mcf2l, Npas4, Nr4a1, Nr4a2, Nr4a3,<br>Plagl1, Ptgs2, Rorb, Tinf2, Wnt2,<br>Zfp292, Zfp36, Zfp462                                                                                          |

|            |                                                            |              |    |                                                                                                                                                                                                                   |
|------------|------------------------------------------------------------|--------------|----|-------------------------------------------------------------------------------------------------------------------------------------------------------------------------------------------------------------------|
| GO:0010605 | negative regulation of macromolecule metabolic process     | 6h, 12h, 24h | 27 | Atf7ip (ENSMUSG00000053935), Bag4, Bcl7a, Cdkn1a, Cited2, Dusp5, Errfi1, Fosb, Foxk1, Foxp1, Hbegf, Hcfc2, Jun, Kdm6b, Nrip2, Per1, Ptpb2, Ptpn3, Rcor2, Sap30, Smad7, Srsf12, Tinf2, Wnt2, Zfp12, Zfp128, Zfp36  |
| GO:0043067 | regulation of programmed cell death                        | 6h, 12h, 24h | 26 | Arhgef2, Bag3, Bag4, Bcl11b, Bdnf, Cdkn1a, Cited2, Cyr61, Dusp1, Jun, Kitl, Map3k5, Mcf2l, Nr4a1, Nr4a2, Nr4a3, Plagl1, Plekhg5, Plk2, Ptgs2, Rilpl1, Scg2, Siah2, Tiam1, Tnfrsf22, Tnfrsf22 (ENSMUSG00000010751) |
| GO:0051172 | negative regulation of nitrogen compound metabolic process | 6h, 12h, 24h | 25 | Atf7ip (ENSMUSG00000053935), Bag4, Bcl7a, Cited2, Dusp5, Fosb, Foxk1, Foxp1, Hcfc2, Htr1a, Jun, Kdm6b, Nrip2, P2ry12, Per1, Ptpb2, Rcor2, Sap30, Smad7, Srsf12, Tinf2, Wnt2, Zfp12, Zfp128, Zfp36                 |
| GO:0009890 | negative regulation of biosynthetic process                | 6h, 12h, 24h | 23 | Atf7ip (ENSMUSG00000053935), Bcl7a, Cited2, Dusp5, Fosb, Foxk1, Foxp1, Hbegf, Hcfc2, Htr1a, Jun, Kdm6b, Nrip2, P2ry12, Per1, Rcor2, Sap30, Smad7, Tinf2, Wnt2, Zfp12, Zfp128, Zfp36                               |
| GO:0051246 | regulation of protein metabolic process                    | 6h, 12h, 24h | 23 | Bag4, Camkk1, Casc3, Cdkn1a, Cyr61, Dlgap1, Dusp1, Dusp5, Errfi1, Gadd45b, Gadd45g, Jun, Kitl, Map3k5, Nedd4l, Ptpn3, Rgs2, Sh3bp5, Siah2, Smad7, Ssr1, Tinf2, Zeb2                                               |
| GO:0032268 | regulation of cellular protein metabolic process           | 6h, 12h, 24h | 22 | Bag4, Camkk1, Casc3, Cdkn1a, Cyr61, Dlgap1, Dusp1, Dusp5, Errfi1, Gadd45b, Gadd45g, Jun, Kitl, Map3k5, Ptpn3, Rgs2, Sh3bp5, Siah2, Smad7, Ssr1, Tinf2, Zeb2                                                       |
| GO:0051174 | regulation of phosphorus metabolic process                 | 6h, 12h, 24h | 18 | Bag4, Camkk1, Cdkn1a, Cyr61, Dusp1, Dusp5, Errfi1, Gadd45b, Gadd45g, Jun, Kitl, Map3k5, Rcan1, Rgs2, Sh3bp5, Smad7, Ssr1, Zeb2                                                                                    |
| GO:0008284 | positive regulation of cell proliferation                  | 6h, 12h, 24h | 17 | Avpr1a, Cdkn1a, Cyr61, E2f3, Egr4, Foxp1, Hbegf, Htr1a, Jun, Kitl, Npy5r, Nr4a1, Odc1, Ptgs2, Scg2, Ssr1, Wnt2                                                                                                    |

|            |                                                         |              |    |                                                                                                                     |
|------------|---------------------------------------------------------|--------------|----|---------------------------------------------------------------------------------------------------------------------|
| GO:0007167 | enzyme linked receptor protein signaling pathway        | 6h, 12h, 24h | 15 | 5830428H23Rik, Arhgef2, Cited2, Csrnp1, Fos, Hbegf, Jun, Mcf2l, Nr4a1, Plekhg5, Rtn4r, Smad7, Tiam1, Tiparp, Zfp128 |
| GO:0043549 | regulation of kinase activity                           | 6h, 12h, 24h | 14 | Camkk1, Cdkn1a, Cyr61, Dusp1, Dusp5, Errfi1, Gadd45b, Gadd45g, Kitl, Map3k5, Rgs2, Sh3bp5, Ssr1, Zeb2               |
| GO:0060548 | negative regulation of cell death                       | 6h, 12h, 24h | 14 | Bag3, Bag4, Bcl11b, Bdnf, Cdkn1a, Cited2, Cyr61, Jun, Kitl, Nr4a2, Nr4a3, Plk2, Scg2, Siah2                         |
| GO:0010942 | positive regulation of cell death                       | 6h, 12h, 24h | 13 | Arhgef2, Cdkn1a, Cyr61, Dusp1, Jun, Map3k5, Mcf2l, Nr4a1, Nr4a3, Plagl1, Plekhg5, Ptgs2, Tiam1                      |
| GO:0010647 | positive regulation of cell communication               | 6h, 12h, 24h | 13 | Arpp19, Bag4, Cited2, Cyr61, Hbegf, Homer1, Kitl, Neurod2, Plekhg5, Plk2, Ptgs2, Wnt2, Zeb2                         |
| GO:0007264 | small GTPase mediated signal transduction               | 6h, 12h      | 12 | Arhgap20, Arhgef2, Arl5b, Cdkn1a, Iqgap2, Ksr1, Mcf2l, Plekhg5, Plk2, Rrad, Siah2, Tiam1                            |
| GO:0043269 | regulation of ion transport                             | 6h, 12h, 24h | 10 | Cacna1h, Cxcl1, Homer1, Kcnf1, Kcnip2, Kcns2, Kcnv1, Nedd4l, P2ry12, Ptgs2                                          |
| GO:0051592 | response to calcium ion                                 | 6h, 12h, 24h | 9  | Dusp1, Fos, Fosb, Homer1, Jun, Junb, Kcnip2, Neurod2, Pcsk1                                                         |
| GO:0031960 | response to corticosteroid stimulus                     | 6h, 12h, 24h | 9  | Avpr1a, Cdkn1a, Cxcl1, Dusp1, Fos, Fosb, Junb, Pcsk1, Ptgs2                                                         |
| GO:0051056 | regulation of small GTPase mediated signal transduction | 6h, 12h      | 9  | Arhgap20, Arhgef2, Arpp19, Iqgap2, Iqsec2, Kitl, Mcf2l, Plekhg5, Tiam1                                              |
| GO:0051348 | negative regulation of transferase activity             | 6h, 12h, 24h | 8  | Cdkn1a, Dusp1, Dusp5, Errfi1, Gadd45b, Gadd45g, Rgs2, Sh3bp5                                                        |
| GO:0019932 | second-messenger-mediated signaling                     | 6h, 12h, 24h | 8  | Avpr1a, Crem, Gucy1b3, Homer1, Htr1a, Mt1, P2ry12, Rcan1                                                            |
| GO:0007243 | intracellular protein kinase cascade                    | 6h, 12h, 24h | 8  | Errfi1, Fos, Jun, Map3k5, P2ry12, Scg2, Sh3bp5, Zfp36                                                               |
| GO:0071248 | cellular response to metal ion                          | 6h, 12h, 24h | 7  | Cacna1h, Fos, Fosb, Jun, Junb, Mt1, Neurod2                                                                         |

|            |                                                      |              |   |                                                |
|------------|------------------------------------------------------|--------------|---|------------------------------------------------|
| GO:0031644 | regulation of neurological system process            | 6h, 12h      | 7 | Arc, Avpr1a, Bdnf, Neurod2, Npy5r, Plk2, Ptgs2 |
| GO:0008016 | regulation of heart contraction                      | 6h, 12h, 24h | 6 | Avpr1a, Cacna1h, Hbegf, Kcnip2, Rgs2, Smad7    |
| GO:0045785 | positive regulation of cell adhesion                 | 6h, 12h, 24h | 6 | Bag4, Cited2, Cyr61, Selp, Smad7, Smoc2        |
| GO:0050678 | regulation of epithelial cell proliferation          | 6h, 12h      | 6 | Foxp1, Jun, Nr4a1, Scg2, Tinf2, Wnt2           |
| GO:0034765 | regulation of ion transmembrane transport            | 6h, 12h, 24h | 6 | Cacna1h, Homer1, Kcnf1, Kcnip2, Kcns2, Kcnv1   |
| GO:0048858 | cell projection morphogenesis                        | 6h, 24h      | 6 | Bcl11b, Dclk1, Jun, Nr4a2, Rtn4r, Stxbp5       |
| GO:0050804 | regulation of synaptic transmission                  | 6h, 12h      | 6 | Arc, Bdnf, Neurod2, Npy5r, Plk2, Ptgs2         |
| GO:0043401 | steroid hormone mediated signaling pathway           | 6h, 12h      | 5 | Nr3c2, Nr4a1, Nr4a2, Nr4a3, Rorb               |
| GO:0071383 | cellular response to steroid hormone stimulus        | 6h, 12h      | 5 | Nr3c2, Nr4a1, Nr4a2, Nr4a3, Rorb               |
| GO:0006470 | protein dephosphorylation                            | 6h           | 5 | Dusp1, Dusp5, Mtmr7, Ptpn12, Ptpn3             |
| GO:0010565 | regulation of cellular ketone metabolic process      | 6h           | 5 | Arpp19, Avpr1a, Odc1, Pdk4, Ptgs2              |
| GO:0051970 | negative regulation of transmission of nerve impulse | 6h           | 4 | Avpr1a, Npy5r, Plk2, Ptgs2                     |
| GO:0031645 | negative regulation of neurological system process   | 6h, 12h      | 4 | Avpr1a, Npy5r, Plk2, Ptgs2                     |
| GO:0048660 | regulation of smooth muscle cell proliferation       | 6h, 12h, 24h | 4 | Hbegf, Jun, Npy5r, Ptgs2                       |

|            |                                                       |              |   |                              |
|------------|-------------------------------------------------------|--------------|---|------------------------------|
| GO:0051403 | stress-activated<br>MAPK cascade                      | 6h, 12h, 24h | 4 | Fos, Jun, Map3k5, Sh3bp5     |
| GO:0046890 | regulation of<br>lipid<br>biosynthetic<br>process     | 6h, 24h      | 4 | Avpr1a, Cyp51, Cyr61, Ptgs2  |
| GO:0060716 | labyrinthine<br>layer blood<br>vessel<br>development  | 6h           | 3 | Cyr61, Junb, Wnt2            |
| GO:0048745 | smooth muscle<br>tissue<br>development                | 6h           | 3 | 5830428H23Rik, Foxp1, Tiparp |
| GO:0000080 | G1 phase of<br>mitotic cell<br>cycle                  | 6h           | 3 | Cdkn1a, E2f3, Tfdp2          |
| GO:0032570 | response to<br>progesterone<br>stimulus               | 6h, 12h, 24h | 3 | Fos, Fosb, Junb              |
| GO:0048145 | regulation of<br>fibroblast<br>proliferation          | 6h, 12h, 24h | 3 | Cdkn1a, Jun, Wnt2            |
| GO:0061041 | regulation of<br>wound healing                        | 6h, 12h, 24h | 3 | Anxa2, Hbegf, Selp           |
| GO:0002573 | myeloid<br>leukocyte<br>differentiation               | 6h           | 3 | Cited2, Jun, Junb            |
| GO:0014032 | neural crest cell<br>development                      | 6h           | 2 | Cited2, Rdh10                |
| GO:0045932 | negative<br>regulation of<br>muscle<br>contraction    | 6h, 24h      | 2 | Ptgs2, Rgs2                  |
| GO:0060043 | regulation of<br>cardiac muscle<br>cell proliferation | 6h           | 2 | Foxp1, Wnt2                  |
| GO:0045907 | positive<br>regulation of<br>vasoconstriction         | 6h, 12h      | 2 | Avpr1a, Ptgs2                |
| GO:0055002 | striated muscle<br>cell<br>development                | 6h, 12h      | 2 | Homer1, Rcan1                |
| GO:0014072 | response to<br>isoquinoline<br>alkaloid               | 6h, 12h      | 2 | Fosb, Pcsk1                  |
| GO:0043392 | negative<br>regulation of<br>DNA binding              | 6h, 12h      | 2 | Jun, Zfp462                  |
| GO:0050873 | brown fat cell<br>differentiation                     | 6h           | 2 | Ptgs2, Rgs2                  |

|            |                                           |         |   |               |
|------------|-------------------------------------------|---------|---|---------------|
| GO:0001975 | response to amphetamine                   | 6h, 12h | 2 | Cxcl1, Nr4a2  |
| GO:0006040 | amino sugar metabolic process             | 6h      | 2 | Nanp, St6gal2 |
| GO:0030282 | bone mineralization                       | 6h      | 2 | Gpnmb, Ptgs2  |
| GO:0045933 | positive regulation of muscle contraction | 6h, 12h | 2 | Ptgs2, Rgs2   |

---
