# Supplementary material for: Glial responses during epileptogenesis in Mus musculus point to potential therapeutic targets
Source: PubMed Central journal article supplement (PMC6095496; doi:10.1371/journal.pone.0201742), 2018-08-16
Supplement: pone.0201742.s011.pdf [file pone.0201742.s011.pdf]

**Table S7:** Significantly changed GO Biological Processes (level 6) at 24 hours post KA treatment, using the "Mapping to ontologies (TRANSPATH)" analysis tool. All significantly changed genes at 24h were considered, and a threshold of p-value <0.05 was applied.

| Gene Ontology Category ID | GO-Biologic Process (level 6)                                  | Time point(s) of enrichment | Number of significantly changed genes at 24h | Symbol of significantly changed genes at 24h                                                                                                                                                                                                                                                                                                                                                                                                                                                                          |
|---------------------------|----------------------------------------------------------------|-----------------------------|----------------------------------------------|-----------------------------------------------------------------------------------------------------------------------------------------------------------------------------------------------------------------------------------------------------------------------------------------------------------------------------------------------------------------------------------------------------------------------------------------------------------------------------------------------------------------------|
| GO:0031326                | regulation of cellular biosynthetic process                    | 6h, 12h, 24h                | 73                                           | Aff1, Akap5, Arid5b, Atp8b1, Baz1a, Bcl11b, Calca, Capn3, Cdkn1a, Cdyl, Crh, Cyr61, Dkk3, Eaf1, Eif4ebp1, Elk3, Eil2, Eng, Etf1, Etv3, Fam120b, Fos, Fosl2, Gcg, Gpam, Grm8, Hbegf, Hivep3, Hmgn1, Hspb1, Htr1a, Icam1, Id2, Il11, Klf4, Lif, Litaf, Maff, Mbd2, Med13, Mybbp1a, Myd88, Neurod6, Nfkbia, Npas4, Nufip1, Pla2g4a, Plek, Ptgfrn, Ptx3, Rgs2, Rnf128, Rps27l, Rps6ka5, S1pr3, Samd4, Sap30, Sfpq, Sin3b, Tgif1, Thbs1, Tlr1, Trib1, Tspo, Tulp4, Wfs1, Wwtr1, Yy2, Zfp110, Zfp275, Zfp536, Zfp593, Zmiz1 |
| GO:0019219                | regulation of nucleobase-containing compound metabolic process | 6h, 12h, 24h                | 66                                           | Aff1, Akap5, Arid5b, Atp8b1, Baz1a, Bcl11b, Calca, Capn3, Cdkn1a, Cdyl, Chn1, Clcf1, Crh, Cyr61, Dkk3, Eaf1, Efna5, Efna5 (ENSMUSG00000090425), Elk3, Eil2, Eng, Epha3, Epha4, Etv3, Fam120b, Fos, Fosl2, Gcg, Grm8, Hivep3, Hmgn1, Htr1a, Icam1, Id2, Il11, Klf4, Lif, Litaf, Lrrk2, Maff, Mbd2, Med13, Mybbp1a, Myd88, Neurod6, Nfkbia, Npas4, Nufip1, Rgs2, Rps6ka5, S1pr3, Sap30, Sfpq, Sin3b, Tbc1d14, Tgif1, Trib1, Tulp4, Wfs1, Wwtr1, Yy2, Zfp110, Zfp275, Zfp536, Zfp593, Zmiz1                              |
| GO:0010468                | regulation of gene expression                                  | 6h, 12h, 24h                | 64                                           | Aff1, Arid5b, Atp8b1, Baz1a, Bcl11b, Calca, Capn3, Cd44, Cdkn1a, Cdyl, Crh, Cyr61, Dkk3, Eaf1, Eif4ebp1, Elk3, Eil2, Eng, Etf1, Etv3, Fam120b, Fos, Fosl2, Hivep3, Hmgn1, Hspb1, Icam1, Id2, Il11, Klf4, Lif, Litaf, Maff, Mbd2, Med13, Mybbp1a, Myd88, Neurod6, Nfkbia, Npas4, Nufip1, Ptgfrn, Rgs2, Rps27l, Rps6ka5, Samd4, Sap30, Serpine1, Sfpq, Sin3b, Tgif1, Thbs1, Tnc, Trdmt1, Trib1, Tulp4, Wfs1, Wwtr1, Yy2, Zfp110, Zfp275, Zfp536, Zfp593, Zmiz1                                                          |

|            |                                                   |              |    |                                                                                                                                                                                                                                                                                                                                                                                                                                                               |
|------------|---------------------------------------------------|--------------|----|---------------------------------------------------------------------------------------------------------------------------------------------------------------------------------------------------------------------------------------------------------------------------------------------------------------------------------------------------------------------------------------------------------------------------------------------------------------|
| GO:0010556 | regulation of macromolecule biosynthetic process  | 6h, 12h, 24h | 64 | Aff1, Arid5b, Atp8b1, Baz1a, Bcl11b, Calca, Capn3, Cdkn1a, Cdyl, Cyr61, Dkk3, Eaf1, Eif4ebp1, Elk3, Eil2, Eng, Etf1, Etv3, Fam120b, Fos, Fosl2, Hbegf, Hivep3, Hmgn1, Hspb1, Hsph1, Icam1, Id2, Il11, Itgav, Klf4, Lif, Litaf, Maff, Mbd2, Med13, Mybbp1a, Myd88, Neurod6, Nfkbia, Npas4, Nufip1, Ptgfrn, Rgs2, Rnf128, Rps27l, Rps6ka5, Samd4, Sap30, Sfpq, Sin3b, Tgif1, Thbs1, Tlr1, Trib1, Tulp4, Wfs1, Wwtr1, Yy2, Zfp110, Zfp275, Zfp536, Zfp593, Zmiz1 |
| GO:0051252 | regulation of RNA metabolic process               | 6h, 12h, 24h | 50 | Aff1, Arid5b, Atp8b1, Baz1a, Bcl11b, Calca, Capn3, Cdyl, Cyr61, Dkk3, Eaf1, Elk3, Eil2, Eng, Etv3, Fam120b, Fos, Fosl2, Hivep3, Hmgn1, Icam1, Id2, Il11, Klf4, Lif, Litaf, Maff, Mbd2, Med13, Mybbp1a, Myd88, Neurod6, Nfkbia, Npas4, Nufip1, Rps6ka5, Sap30, Sfpq, Sin3b, Tgif1, Trib1, Tulp4, Wfs1, Wwtr1, Yy2, Zfp110, Zfp275, Zfp536, Zfp593, Zmiz1                                                                                                       |
| GO:0051246 | regulation of protein metabolic process           | 6h, 12h, 24h | 48 | Akap5, Calca, Capn3, Cblb, Cd44, Cdkn1a, Clcf1, Crh, Cyr61, Edem1, Efna5, Efna5 (ENSMUSG00000090425), Eif4ebp1, Eng, Epha4, Etf1, Fgfr1op, Gadd45b, Gadd45g, Gcg, Grm1, Hspb1, Igfbp3, Il11, Il1rn, Itgav, Klf4, Lif, Lrrk2, Mbtps2, Myd88, Nfkbia, Prkar2a, Ptgfrn, Rgs2, Rnf128, Rps27l, Rps6ka5, Samd4, Serpine1, Serpini1, Thbs1, Thbs4, Timp1, Tlr1, Trib1, Wfs1, Wwtr1                                                                                  |
| GO:0031325 | positive regulation of cellular metabolic process | 6h, 12h, 24h | 46 | Aff1, Akap5, Bcl11b, Calca, Capn3, Cd44, Cdkn1a, Clcf1, Crh, Cyr61, Eaf1, Efna5, Efna5 (ENSMUSG00000090425), Eil2, Eng, Fos, Fosl2, Gcg, Gpam, Hivep3, Hmgn1, Hspb1, Icam1, Id2, Il11, Klf4, Lif, Lrrk2, Med13, Myd88, Nfkbia, Npas4, Nufip1, Pla2g4a, Ptx3, Rps27l, Rps6ka5, Samd4, Thbs1, Thbs4, Tlr1, Trib1, Tspo, Wfs1, Wwtr1, Zmiz1                                                                                                                      |

|            |                                                        |              |    |                                                                                                                                                                                                                                                                                                                                         |
|------------|--------------------------------------------------------|--------------|----|-----------------------------------------------------------------------------------------------------------------------------------------------------------------------------------------------------------------------------------------------------------------------------------------------------------------------------------------|
| GO:0010604 | positive regulation of macromolecule metabolic process | 6h, 12h, 24h | 43 | Aff1, Akap5, Bcl11b, Capn3, Cblb, Cd44, Cdkn1a, Clcf1, Crh, Cyr61, Eaf1, Efna5, Efna5 (ENSMUSG00000090425), Eil2, Eng, Fos, Fosl2, Gcg, Hivep3, Hmgn1, Hspb1, Hsph1, Id2, Il11, Klf4, Lif, Lrrk2, Med13, Myd88, Nfkb1a, Npas4, Nufip1, Rps27l, Rps6ka5, Samd4, Thbs1, Thbs4, Tlr1, Tnc, Trib1, Wfs1, Wwtr1, Zmiz1                       |
| GO:0032268 | regulation of cellular protein metabolic process       | 6h, 12h, 24h | 43 | Akap5, Calca, Capn3, Cd44, Cdkn1a, Clcf1, Crh, Cyr61, Edem1, Efna5, Efna5 (ENSMUSG00000090425), Eif4ebp1, Eng, Epha4, Etf1, Fgfr1op, Gadd45b, Gadd45g, Gcg, Grm1, Hspb1, Igfbp3, Il11, Il1rn, Itgav, Lif, Lrrk2, Mbtps2, Nfkb1a, Prkar2a, Ptgfrn, Rgs2, Rps27l, Rps6ka5, Samd4, Serpine1, Thbs1, Thbs4, Timp1, Tlr1, Trib1, Wfs1, Wwtr1 |
| GO:0043067 | regulation of programmed cell death                    | 6h, 12h, 24h | 42 | Arhgef4, Bag3, Bcl11b, Birc3, Capn3, Casp8, Cd44, Cdkn1a, Clcf1, Crh, Cstb, Ctnna1, Ctsc, Cyr61, Eif2ak2, Gcg, Gpam, Grm8, Hspa1b, Hspb1, Hsph1, Igfbp3, Il1rn, Itgav, Kcnma1, Lgals1, Lrrk2, Mcl1, Mybbp1a, Myd88, Nfkb1a, Nmt1, Pla2g4a, Rps27l, Scg2, Serpine1, Spp1, Tgm2, Thbs1, Timp1, Tspo, Wfs1                                 |
| GO:0009891 | positive regulation of biosynthetic process            | 6h, 12h, 24h | 37 | Aff1, Akap5, Bcl11b, Calca, Capn3, Crh, Cyr61, Eaf1, Eil2, Eng, Fos, Fosl2, Gcg, Gpam, Hivep3, Hmgn1, Hspb1, Hsph1, Icam1, Id2, Il11, Klf4, Lif, Med13, Myd88, Nfkb1a, Npas4, Nufip1, Pla2g4a, Ptx3, Rps27l, Rps6ka5, Samd4, Thbs1, Tlr1, Wwtr1, Zmiz1                                                                                  |
| GO:0051174 | regulation of phosphorus metabolic process             | 6h, 12h, 24h | 36 | Akap5, Calca, Cd44, Cdkn1a, Clcf1, Crh, Cyr61, Edem1, Efna5, Efna5 (ENSMUSG00000090425), Eng, Epha4, Fgfr1op, Fkbp1b, Gadd45b, Gadd45g, Gcg, Grm1, Hspb1, Igfbp3, Il11, Il1rn, Lif, Lrrk2, Mbtps2, Pcdh11x, Plek, Prkar2a, Rgs2, Rps6ka5, Thbs1, Thbs4, Tlr1, Trib1, Wfs1, Wwtr1                                                        |
| GO:0031324 | negative regulation of cellular metabolic process      | 6h, 12h, 24h | 33 | Arid5b, Atp8b1, Calca, Capn3, Cdkn1a, Dkk3, Eif4ebp1, Elk3, Eng, Etf1, Grm8, Hbegf, Hspb1, Htr1a, Id2, Igfbp3, Itgav, Klf4, Mbd2, Mybbp1a, Plek, Ptgfrn, Rnf128, Rps6ka5, S1pr3, Samd4, Sap30, Serpine1, Sin3b, Tgif1, Timp1, Tspo, Wwtr1                                                                                               |

|            |                                                            |                          |    |                                                                                                                                                                                                         |
|------------|------------------------------------------------------------|--------------------------|----|---------------------------------------------------------------------------------------------------------------------------------------------------------------------------------------------------------|
| GO:0008284 | positive regulation of cell proliferation                  | 6h, 12h, 24h             | 30 | Cdkn1a, Clcf1, Crh, Cyr61, Fgfr1op, Fosl2, Gfap, Gpam, Hbegf, Htr1a, Id2, Il11, Il13ra1, Itgav, Lif, Myd88, Odc1, Osmr, Pla2g4a, S1pr3, Scg2, Tbrg4, Tgif1, Tgm2, Thbs4, Timp1, Tnc, Tspo, Wwtr1, Zmiz1 |
| GO:0051173 | positive regulation of nitrogen compound metabolic process | 6h, 12h, 24h             | 30 | Aff1, Akap5, Bcl11b, Calca, Capn3, Clcf1, Crh, Cyr61, Eaf1, Ell2, Eng, Fos, Fosl2, Gcg, Hivep3, Hmgn1, Icam1, Id2, Il11, Klf4, Lif, Med13, Myd88, Nfkbia, Npas4, Nufip1, Ptx3, Rps6ka5, Wwtr1, Zmiz1    |
| GO:0009890 | negative regulation of biosynthetic process                | 6h, 12h, 24h             | 28 | Arid5b, Atp8b1, Calca, Capn3, Dkk3, Eif4ebp1, Elk3, Eng, Etv3, Grm8, Hbegf, Htr1a, Id2, Itgav, Klf4, Mbd2, Mybbp1a, Plek, Ptgfrn, Rnf128, Rps6ka5, S1pr3, Samd4, Sap30, Sin3b, Tgif1, Tspo, Wwtr1       |
| GO:0010605 | negative regulation of macromolecule metabolic process     | 6h, 12h, 24h             | 28 | Arid5b, Atp8b1, Calca, Capn3, Cdkn1a, Crh, Dkk3, Eif4ebp1, Elk3, Eng, Etv3, Hbegf, Id2, Igfbp3, Itgav, Klf4, Mbd2, Mybbp1a, Ptgfrn, Rnf128, Rps6ka5, Samd4, Sap30, Serpine1, Sin3b, Tgif1, Timp1, Wwtr1 |
| GO:0060548 | negative regulation of cell death                          | 6h, 12h, 24h             | 26 | Bag3, Bcl11b, Birc3, Capn3, Cd44, Cdkn1a, Clcf1, Crh, Ctnna1, Cyr61, Gcg, Gpam, Hspa1b, Hspb1, Hsph1, Il1rn, Itgav, Mcl1, Myd88, Nfkbia, Scg2, Serpine1, Spp1, Thbs1, Timp1, Wfs1                       |
| GO:0016310 | phosphorylation                                            |                          | 26 | Calca, Cdk14, Cdkn1a, Dclk1, Dclk3, Dyrk3, Eif2ak2, Epha3, Epha4, Gadd45b, Gadd45g, Grm1, Igfbp3, Lif, Lrrk2, Nek6, Pak3, Papss2, Prkar2a, Riok2, Rps6ka5, Tbrg4, Thbs1, Trib1, Uck2, Yes1              |
| GO:0010647 | positive regulation of cell communication                  | 12h, 24h<br>6h, 12h, 24h | 25 | Akap5, Casp8, Cd44, Clcf1, Crh, Ctnna1, Cyr61, Dock2, Eng, Gcg, Gfap, Hbegf, Igfbp3, Il11, Itgav, Lgals1, Lif, Litaf, Lrrk2, Mbd2, Myd88, Nek6, Tgm2, Thbs1, Zdhhc17                                    |
| GO:0010627 | regulation of intracellular protein kinase cascade         |                          | 25 | Akap5, Capn3, Casp8, Cd44, Clcf1, Cyr61, Epha4, Gcg, Grm1, Hbegf, Hspb1, Igfbp3, Il11, Il1rn, Itgav, Klf4, Lgals1, Lif, Litaf, Myd88, Nek6, Tgm2, Thbs1, Zdhhc17, Zfp110                                |
|            |                                                            | 12h, 24h                 |    |                                                                                                                                                                                                         |

|            |                                                            |              |    |                                                                                                                                                                        |
|------------|------------------------------------------------------------|--------------|----|------------------------------------------------------------------------------------------------------------------------------------------------------------------------|
| GO:0009967 | positive regulation of signal transduction                 | 12h, 24h     | 23 | Akap5, Casp8, Cd44, Clcf1, Ctnna1, Cyr61, Dock2, Eng, Gcg, Hbegf, Igfbp3, Il11, Itgav, Lgals1, Lif, Litaf, Lrrk2, Mbd2, Myd88, Nek6, Tgm2, Thbs1, Zdhhc17              |
| GO:0006468 | protein phosphorylation                                    | 12h, 24h     | 22 | Calca, Cdk14, Dcl1, Dcl3, Dyrk3, Eif2ak2, Epha3, Epha4, Gadd45b, Gadd45g, Grm1, Igfbp3, Lif, Lrrk2, Nek6, Pak3, Riok2, Rps6ka5, Tbrg4, Thbs1, Trib1, Yes1              |
| GO:0008285 | negative regulation of cell proliferation                  | 12h, 24h     | 21 | Bcl11b, Cblb, Cd9, Cdkn1a, Cgref1, Ctnna1, Eif2ak2, Eng, Fcgr2b, Gpnmb, Hspa1b, Id2, Igfbp3, Klf4, Lif, Lrrk2, Scg2, Tgif1, Thbs1, Trib1, Tspo                         |
| GO:0051172 | negative regulation of nitrogen compound metabolic process | 6h, 12h, 24h | 21 | Arid5b, Atp8b1, Calca, Capn3, Dkk3, Elk3, Eng, Etv3, Grm8, Htr1a, Id2, Klf4, Mbd2, Mybbp1a, Rps6ka5, S1pr3, Sap30, Sin3b, Tgif1, Tspo, Wwtr1                           |
| GO:0043549 | regulation of kinase activity                              | 6h, 12h, 24h | 21 | Calca, Cdkn1a, Cyr61, Edem1, Epha4, Fgfr1op, Gadd45b, Gadd45g, Gcg, Grm1, Hspb1, Il1rn, Lrrk2, Mbtps2, Prkar2a, Rgs2, Thbs1, Tlr1, Trib1, Wfs1, Wwtr1                  |
| GO:0007167 | enzyme linked receptor protein signaling pathway           | 6h, 12h, 24h | 20 | Adam12, Arhgef4, Arid5b, Chn1, Efna5, Efna5 (ENSMUSG00000090425), Eif4ebp1, Eng, Epha3, Epha4, Erbb2ip, Fos, Grem2, Hbegf, Lif, Ltbp1, Myd88, Nfkb1a, Prkar2a, Rps6ka5 |
| GO:0060284 | regulation of cell development                             | 12h, 24h     | 20 | Akap5, Arf6, Cdh4, Chn1, Clcf1, Ctnna1, Epha3, Epha4, Gfap, Id2, Igfbp3, Lgals1, Lif, Lrrk2, Spp1, Tgif1, Tspo, Vim, Wwtr1, Zfp536                                     |
| GO:0007010 | cytoskeleton organization                                  | 12h, 24h     | 19 | Arf6, Cald1, Capn3, Dock2, Erbb2ip, Fgfr1op, Fhod3, Gcc2, Gfap, Kif18a, Nedd1, Nedd9, Nek6, Plek, Rnd3, Shroom3, Svil, Synpo, Vim                                      |
| GO:0010648 | negative regulation of cell communication                  | 12h, 24h     | 19 | Cblb, Cd44, Dkk3, Eng, Igfbp3, Il1rn, Klf4, Lif, Ltbp1, Mcl1, Mgl1, Nfkb1a, Plek, Rgs2, Tgif1, Thbs1, Trib1, Wwtr1, Zfp536                                             |
| GO:0009968 | negative regulation of signal transduction                 | 12h, 24h     | 18 | Cblb, Cd44, Dkk3, Eng, Igfbp3, Il1rn, Klf4, Lif, Ltbp1, Mcl1, Nfkb1a, Plek, Rgs2, Tgif1, Thbs1, Trib1, Wwtr1, Zfp536                                                   |
| GO:0010942 | positive regulation of cell death                          | 6h, 12h, 24h | 18 | Arhgef4, Casp8, Cd44, Cdkn1a, Crh, Ctsc, Cyr61, Eif2ak2, Igfbp3, Kcnma1, Lrrk2, Mybbp1a, Nmt1, Pla2g4a, Rps27l, Tgm2, Thbs1, Tspo                                      |

|            |                                             |                          |    |                                                                                                                                                |
|------------|---------------------------------------------|--------------------------|----|------------------------------------------------------------------------------------------------------------------------------------------------|
| GO:0031347 | regulation of defense response              |                          | 18 | Calca, Casp8, Clcf1, Crh, Dock2, Fcgr2b, Fos, Klf4, Mgl1, Myd88, Nfkb1a, Osmr, Pla2g4a, Pvr, Rps6ka5, Serpine1, Tgm2, Tlr1                     |
| GO:0043269 | regulation of ion transport                 | 12h, 24h<br>6h, 12h, 24h | 18 | Akap5, Calca, Capn3, Clic4, Crh, Cybb, Fkbp1b, Gcg, Icam1, Kcnab1, Kcnma1, Kcnq3, Kcnq5, Scn2a1, Scn3b, Scn8a (ENSMUSG00000023033), Tspo, Wfs1 |
| GO:0051960 | regulation of nervous system development    | 12h, 24h                 | 18 | Akap5, Arf6, Cdh4, Chn1, Clcf1, Ctnna1, Epha3, Epha4, Gfap, Id2, Lgals1, Lif, Lrrk2, Spp1, Tgif1, Tspo, Vim, Zfp536                            |
| GO:0030001 | metal ion transport                         | 12h, 24h                 | 16 | Fkbp1b, Itgav, Kcnab1, Kcnma1, Kcnq3, Kcnq5, Kcnt2, Kctd4, Mmgt2, Npy, Scn2a1, Scn3b, Scn8a (ENSMUSG00000023033), Slc10a6, Slc6a8, Zdhhc17     |
| GO:0030334 | regulation of cell migration                | 12h, 24h                 | 16 | Acan, Amotl1, C3ar1, Clic4, Cyr61, Fgfr1op, Hbegf, Icam1, Igfbp3, Itgav, Klf4, Msn, Serpine1, Thbs1, Thbs4, Trib1                              |
| GO:0051046 | regulation of secretion                     | 12h, 24h                 | 16 | Akap5, Cadps2, Clcf1, Crh, Efna5, Efna5 (ENSMUSG00000090425), Gcg, Gpam, Grm1, Grm8, Il11, Il1rn, Lif, Prkar2a, Srgn, Syt4                     |
| GO:0050801 | ion homeostasis                             | 12h, 24h                 | 15 | C3ar1, Calca, Crh, Fkbp1b, Grm1, Itgav, Kcnma1, Lrrk2, Mt2, S1pr3, Scn2a1, Scn3b, Scn8a (ENSMUSG00000023033), Tgm2, Wfs1                       |
| GO:0045597 | positive regulation of cell differentiation | 12h, 24h                 | 15 | Adamts9, Akap5, Calca, Cdh4, Clcf1, Ctnna1, Cyr61, Gfap, Id2, Igfbp3, Lif, Msr1, Tgif1, Tspo, Wwtr1                                            |
| GO:0051347 | positive regulation of transferase activity | 12h, 24h                 | 15 | Calca, Cyr61, Edem1, Epha4, Gadd45b, Gadd45g, Gcg, Grm1, Il1rn, Lrrk2, Mbtps2, Prkar2a, Thbs1, Tlr1, Wfs1                                      |
| GO:0045596 | negative regulation of cell differentiation | 12h, 24h                 | 13 | Calca, Ctnna1, Epha4, Id2, Itgav, Klf4, Lif, Lrrk2, Nfkb1a, Spp1, Tspo, Wwtr1, Zfp536                                                          |
| GO:0051346 | negative regulation of hydrolase activity   | 12h, 24h                 | 13 | Cd44, Cstb, Ctla2b, Fkbp1b, Hspa1b, Klf4, Pcdh11x, Plek, Pros1, Rgs2, Serpine1, Serpini1, Thbs1                                                |
| GO:0018193 | peptidyl-amino acid modification            | 12h, 24h                 | 13 | Agtbbp1, Bgn, Dyrk3, Edem1, Epha4, Fkbp1b, Lif, Lrrk2, Nek6, Nmt1, Pros1, Rps6ka5, Tgm2                                                        |
| GO:0051345 | positive regulation of hydrolase activity   | 12h, 24h                 | 13 | Casp8, Chn1, Cyr61, Edem1, Grm1, Lrrk2, Mbtps2, Plek, Prkar2a, Rgs2, Rps27l, Tgm2, Wfs1                                                        |
| GO:0007243 | intracellular protein kinase cascade        | 6h, 12h, 24h             | 12 | Clcf1, Fos, Gcg, Itgav, Lrrk2, Myd88, Nmi, Pak3, Plek, Rps6ka5, Scg2, Trib1                                                                    |

|            |                                                    |              |    |                                                                                                                 |
|------------|----------------------------------------------------|--------------|----|-----------------------------------------------------------------------------------------------------------------|
| GO:0015672 | monovalent inorganic cation transport              | 12h, 24h     | 12 | Agtpbp1, Kcnab1, Kcnma1, Kcnq3, Kcnq5, Kcnt2, Kctd4, Scn2a1, Scn3b, Scn8a (ENSMUSG00000023033), Slc10a6, Slc6a8 |
| GO:0031349 | positive regulation of defense response            | 12h, 24h     | 12 | Casp8, Crh, Fos, Myd88, Nfkbia, Osmr, Pla2g4a, Pvr, Rps6ka5, Serpine1, Tgm2, Tlr1                               |
| GO:0050778 | positive regulation of immune response             | 12h, 24h     | 12 | C1qb, C3ar1, Casp8, Cd44, Clcf1, Fos, Hspa1b, Myd88, Nfkbia, Pvr, Rps6ka5, Tlr1                                 |
| GO:0034765 | regulation of ion transmembrane transport          | 6h, 12h, 24h | 12 | Clic4, Crh, Cybb, Fkbp1b, Gcg, Kcnab1, Kcnma1, Kcnq3, Kcnq5, Scn2a1, Scn3b, Scn8a (ENSMUSG00000023033)          |
| GO:0010975 | regulation of neuron projection development        | 12h, 24h     | 12 | Akap5, Arf6, Cdh4, Chn1, Epha3, Epha4, Gfap, Lgals1, Lif, Lrrk2, Spp1, Vim                                      |
| GO:0052547 | regulation of peptidase activity                   | 12h, 24h     | 12 | Casp8, Cd44, Cstb, Ctla2b, Cyr61, Hspa1b, Klf4, Pros1, Rps27l, Serpine1, Serpini1, Thbs1                        |
| GO:0019932 | second-messenger-mediated signaling                | 6h, 12h, 24h | 11 | Calca, Fkbp1b, Gcg, Grm1, Grm8, Gucy1b3, Htr1a, Mt2, Npy, S1pr3, Tgm2                                           |
| GO:0048858 | cell projection morphogenesis                      | 6h, 24h      | 10 | Bcl11b, Ctnna1, Dclk1, Epha4, Gfap, Pak3, Thbs4, Tnc, Tspo, Wwtr1                                               |
| GO:0030003 | cellular cation homeostasis                        | 12h, 24h     | 10 | C3ar1, Calca, Fkbp1b, Grm1, Itgav, Kcnma1, Mt2, S1pr3, Tgm2, Wfs1                                               |
| GO:0050867 | positive regulation of cell activation             | 24h          | 10 | Capn3, Cdkn1a, Clcf1, Gpam, Hsph1, Il13ra1, Myd88, Plek, Thbs1, Yes1                                            |
| GO:2000147 | positive regulation of cell motility               | 12h, 24h     | 10 | Amotl1, C3ar1, Cyr61, Fgfr1op, Hbegf, Icam1, Itgav, Serpine1, Thbs1, Thbs4                                      |
| GO:0051272 | positive regulation of cellular component movement | 12h, 24h     | 10 | Amotl1, C3ar1, Cyr61, Fgfr1op, Hbegf, Icam1, Itgav, Serpine1, Thbs1, Thbs4                                      |
| GO:0051493 | regulation of cytoskeleton organization            | 12h, 24h     | 10 | Arf6, Arpc1b, Clic4, Efna5, Efna5 (ENSMUSG00000090425), Epha3, Hsph1, Pak3, Plek, Synpo                         |
| GO:0050727 | regulation of inflammatory response                | 12h, 24h     | 10 | Calca, Clcf1, Fcgr2b, Klf4, Mgl1, Myd88, Osmr, Pla2g4a, Serpine1, Tgm2                                          |
| GO:0051249 | regulation of lymphocyte activation                | 24h          | 10 | Cblb, Cdkn1a, Clcf1, Fcgr2b, Gpam, Hsph1, Id2, Il13ra1, Myd88, Yes1                                             |
| GO:0031960 | response to corticosteroid stimulus                | 6h, 12h, 24h | 10 | C1qb, Cdkn1a, Crh, Eng, Fos, Il1rn, Kcnma1, Pla2g4a, Sdc1, Serpine1                                             |

|            |                                                              |              |   |                                                                                       |
|------------|--------------------------------------------------------------|--------------|---|---------------------------------------------------------------------------------------|
| GO:0032103 | positive regulation of response to external stimulus         | 12h, 24h     | 9 | C3ar1, Npy, Osmr, Pla2g4a, Scg2, Serpine1, Tgm2, Thbs1, Thbs4                         |
| GO:0045765 | regulation of angiogenesis                                   | 12h, 24h     | 9 | C3ar1, Cyr61, Eng, Klf4, Lif, Rnh1, Serpine1, Thbs1, Thbs4                            |
| GO:0010769 | regulation of cell morphogenesis involved in differentiation | 12h, 24h     | 9 | Akap5, Cdh4, Chn1, Epha3, Epha4, Lif, Lrrk2, Spp1, Wwtr1                              |
| GO:0010810 | regulation of cell-substrate adhesion                        | 12h, 24h     | 9 | Cyr61, Efna5, Efna5 (ENSMUSG00000090425), Egfl6, Epha3, Lgals1, Serpine1, Spp1, Thbs1 |
| GO:0070201 | regulation of establishment of protein localization          | 12h, 24h     | 9 | Akap5, Arf6, Cdkn1a, Gcc2, Gpam, Nedd1, Nfkb1a, Srgn, Wwtr1                           |
| GO:0019216 | regulation of lipid metabolic process                        | 24h          | 9 | Bcl11b, Cyr61, Dkk3, Gcg, Gpam, Id2, Kcnma1, Pla2g4a, Tspo                            |
| GO:0019221 | cytokine-mediated signaling pathway                          | 12h, 24h     | 8 | Cd44, Clcf1, Csf2rb2, Icam1, Il13ra1, Myd88, Osmr, Rps6ka5                            |
| GO:0051348 | negative regulation of transferase activity                  | 6h, 12h, 24h | 8 | Cdkn1a, Fgfr1op, Gadd45b, Gadd45g, Hspb1, Rgs2, Trib1, Wwtr1                          |
| GO:0045785 | positive regulation of cell adhesion                         | 6h, 12h, 24h | 8 | Calca, Cyr61, Egfl6, Itgav, Lgals1, Spp1, Tgm2, Thbs1                                 |
| GO:0002696 | positive regulation of leukocyte activation                  | 24h          | 8 | Cdkn1a, Clcf1, Gpam, Hsph1, Il13ra1, Myd88, Thbs1, Yes1                               |
| GO:0006457 | protein folding                                              | 24h          | 8 | Bag2, Bag3, Edem1, Fkbp1b, Hspa1b, Hsph1, Tubb6, Wfs1                                 |
| GO:0032956 | regulation of actin cytoskeleton organization                | 24h          | 8 | Arf6, Arpc1b, Efna5, Efna5 (ENSMUSG00000090425), Epha3, Pak3, Plek, Synpo             |
| GO:0043087 | regulation of GTPase activity                                | 12h, 24h     | 8 | Chn1, Efna5, Efna5 (ENSMUSG00000090425), Epha3, Epha4, Lrrk2, Rgs2, Tbc1d14           |
| GO:0030198 | extracellular matrix organization                            | 12h, 24h     | 7 | Acan, Anxa2, Crispld2, Cyr61, Egfl6, Eng, Gfap                                        |
| GO:2000146 | negative regulation of cell motility                         | 24h          | 7 | Acan, Clic4, Igfbp3, Klf4, Serpine1, Thbs1, Trib1                                     |
| GO:0051271 | negative regulation of cellular component movement           | 24h          | 7 | Acan, Clic4, Igfbp3, Klf4, Serpine1, Thbs1, Trib1                                     |



|            |                                                      |              |   |                                                   |
|------------|------------------------------------------------------|--------------|---|---------------------------------------------------|
| GO:0045807 | positive regulation of endocytosis                   | 12h, 24h     | 7 | Caly, Fcgr2b, Itgav, Pros1, Ptx3, Serpine1, Tub   |
| GO:0043270 | positive regulation of ion transport                 | 12h, 24h     | 7 | Akap5, Capn3, Crh, Gcg, Scn3b, Tspo, Wfs1         |
| GO:0045088 | regulation of innate immune response                 | 12h, 24h     | 7 | Casp8, Fos, Myd88, Nfkb1a, Pvr, Rps6ka5, Tlr1     |
| GO:0070663 | regulation of leukocyte proliferation                | 24h          | 7 | Cblb, Cdkn1a, Clcf1, Fcgr2b, Gpam, Il13ra1, Myd88 |
| GO:0060191 | regulation of lipase activity                        | 12h, 24h     | 7 | Cyr61, Fkbp1b, Grm1, Plek, Prkar2a, Rgs2, Tgm2    |
| GO:0090257 | regulation of muscle system process                  | 12h, 24h     | 7 | Calca, Cald1, Fkbp1b, Kcnma1, Klf4, Rgs2, Scn3b   |
| GO:0048660 | regulation of smooth muscle cell proliferation       | 6h, 12h, 24h | 7 | Hbegf, Id2, Igfbp3, Klf4, Myd88, Tgm2, Trib1      |
| GO:0051592 | response to calcium ion                              | 6h, 12h, 24h | 7 | Capn3, Clic4, Fos, Kcnma1, Pla2g4a, Sdc1, Thbs1   |
| GO:0007162 | negative regulation of cell adhesion                 | 24h          | 6 | Il1rn, Klf4, Lgals1, Serpine1, Thbs1, Tnc         |
| GO:0030308 | negative regulation of cell growth                   | 12h, 24h     | 6 | Cdkn1a, Cgref1, Gng4, Hspa1b, Ndr3, Spp1          |
| GO:0001818 | negative regulation of cytokine production           | 24h          | 6 | Fcgr2b, Klf4, Rnf125, Rps6ka5, Thbs1, Tspo        |
| GO:0032102 | negative regulation of response to external stimulus | 12h, 24h     | 6 | Epha4, Fcgr2b, Gcg, Klf4, Serpine1, Spp1          |
| GO:0002221 | pattern recognition receptor signaling pathway       | 12h, 24h     | 6 | Casp8, Fos, Myd88, Nfkb1a, Rps6ka5, Tlr1          |
| GO:0048520 | positive regulation of behavior                      | 12h, 24h     | 6 | C3ar1, Crh, Scg2, Serpine1, Thbs1, Thbs4          |
| GO:0001819 | positive regulation of cytokine production           | 12h, 24h     | 6 | C3ar1, Calca, Hspb1, Myd88, Serpine1, Thbs1       |
| GO:0010638 | positive regulation of organelle organization        | 12h, 24h     | 6 | Anxa2, Arf6, Pla2g4a, Plek, Rps6ka5, Synpo        |
| GO:0042035 | regulation of cytokine biosynthetic process          | 12h, 24h     | 6 | Hspb1, Klf4, Myd88, Rnf128, Thbs1, Tlr1           |

|            |                                                                |              |   |                                                                |
|------------|----------------------------------------------------------------|--------------|---|----------------------------------------------------------------|
| GO:0032386 | regulation of intracellular transport                          | 12h, 24h     | 6 | Akap5, Cdkn1a, Fkbp1b, Gcc2, Nfkbia, Wwtr1                     |
| GO:0042391 | regulation of membrane potential                               | 12h, 24h     | 6 | Grm1, Kcnma1, Lrrk2, Scn2a1, Scn3b, Scn8a (ENSMUSG00000023033) |
| GO:0090276 | regulation of peptide hormone secretion                        | 12h, 24h     | 6 | Akap5, Crh, Efna5, Efna5 (ENSMUSG00000090425), Gcg, Prkar2a    |
| GO:0090087 | regulation of peptide transport                                | 12h, 24h     | 6 | Akap5, Crh, Efna5, Efna5 (ENSMUSG00000090425), Gcg, Prkar2a    |
| GO:0061041 | regulation of wound healing                                    | 6h, 12h, 24h | 6 | Anxa2, Capn3, Hbegf, Plek, Serpine1, Thbs1                     |
| GO:0034284 | response to monosaccharide stimulus                            | 12h, 24h     | 6 | Acan, Fkbp1b, Gpam, Icam1, Lgals1, Thbs1                       |
| GO:0034623 | cellular macromolecular complex disassembly                    | 24h          | 5 | Akap5, Etf1, Kif18a, Nedd1, Rpl12                              |
| GO:0071222 | cellular response to lipopolysaccharide                        | 12h, 24h     | 5 | Icam1, Myd88, Nfkbia, Serpine1, Tspo                           |
| GO:0071248 | cellular response to metal ion                                 | 6h, 12h, 24h | 5 | Capn3, Clic4, Fos, Id2, Tspo                                   |
| GO:0016525 | negative regulation of angiogenesis                            | 12h, 24h     | 5 | Klf4, Lif, Serpine1, Thbs1, Thbs4                              |
| GO:0031345 | negative regulation of cell projection organization            | 12h, 24h     | 5 | Epha4, Gfap, Lgals1, Spp1, Vim                                 |
| GO:0051048 | negative regulation of secretion                               | 12h, 24h     | 5 | Crh, Il11, Il1rn, Lif, Srgn                                    |
| GO:0031175 | neuron projection development                                  | 24h          | 5 | Arf6, Cd44, Npy, Pak3, Tnc                                     |
| GO:0045766 | positive regulation of angiogenesis                            | 12h, 24h     | 5 | C3ar1, Cyr61, Eng, Serpine1, Thbs1                             |
| GO:0050921 | positive regulation of chemotaxis                              | 12h, 24h     | 5 | C3ar1, Scg2, Serpine1, Thbs1, Thbs4                            |
| GO:0002687 | positive regulation of leukocyte migration                     | 12h, 24h     | 5 | C3ar1, Icam1, Serpine1, Thbs1, Thbs4                           |
| GO:0051092 | positive regulation of NF-kappaB transcription factor activity | 12h, 24h     | 5 | Capn3, Icam1, Myd88, Nfkbia, Rps6ka5                           |

|            |                                                                    |              |   |                                                        |
|------------|--------------------------------------------------------------------|--------------|---|--------------------------------------------------------|
| GO:0043241 | protein complex disassembly                                        | 24h          | 5 | Akap5, Etf1, Kif18a, Nedd1, Rpl12                      |
| GO:0002819 | regulation of adaptive immune response                             | 24h          | 5 | Cd44, Clcf1, Fcgr2b, Hspa1b, Pvr                       |
| GO:0022407 | regulation of cell-cell adhesion                                   | 12h, 24h     | 5 | Efna5, Efna5 (ENSMUSG00000090425), Il1rn, Klf4, Lgals1 |
| GO:0008277 | regulation of G-protein coupled receptor protein signaling pathway | 24h          | 5 | Gng4, Lrrk2, Mgll, Plek, Rgs2                          |
| GO:0008016 | regulation of heart contraction                                    | 6h, 12h, 24h | 5 | Calca, Fkbp1b, Hbegf, Rgs2, Scn3b                      |
| GO:0046890 | regulation of lipid biosynthetic process                           | 6h, 24h      | 5 | Cyr61, Dkk3, Gpam, Pla2g4a, Tspo                       |
| GO:0050764 | regulation of phagocytosis                                         | 24h          | 5 | Fcgr2b, Itgav, Pros1, Ptx3, Tub                        |
| GO:0032680 | regulation of tumor necrosis factor production                     | 12h, 24h     | 5 | Hspb1, Myd88, Thbs1, Tlr1, Tspo                        |
| GO:0030325 | adrenal gland development                                          | 24h          | 4 | Arid5b, Crh, Dkk3, Tspo                                |
| GO:0034620 | cellular response to unfolded protein                              | 24h          | 4 | Edem1, Eif2ak2, Mbtps2, Wfs1                           |
| GO:0030968 | endoplasmic reticulum unfolded protein response                    | 24h          | 4 | Edem1, Eif2ak2, Mbtps2, Wfs1                           |
| GO:0007229 | integrin-mediated signaling pathway                                | 24h          | 4 | Erb2ip, Itgav, Nedd9, Plek                             |
| GO:0046887 | positive regulation of hormone secretion                           | 24h          | 4 | Clcf1, Crh, Gcg, Lif                                   |
| GO:0008064 | regulation of actin polymerization or depolymerization             | 12h, 24h     | 4 | Arf6, Arpc1b, Pak3, Plek                               |
| GO:0030193 | regulation of blood coagulation                                    | 12h, 24h     | 4 | Anxa2, Plek, Serpine1, Thbs1                           |
| GO:0048145 | regulation of fibroblast proliferation                             | 6h, 12h, 24h | 4 | Cdkn1a, Fosl2, Tgif1, Zmiz1                            |

|            |                                                     |              |   |                                                |
|------------|-----------------------------------------------------|--------------|---|------------------------------------------------|
| GO:0051893 | regulation of focal adhesion assembly               | 24h          | 4 | Efna5, Efna5 (ENSMUSG00000090425), Eph3, Thbs1 |
| GO:0002688 | regulation of leukocyte chemotaxis                  | 12h, 24h     | 4 | C3ar1, Serpine1, Thbs1, Thbs4                  |
| GO:0032368 | regulation of lipid transport                       | 24h          | 4 | Itgav, Nfkb1a, Thbs1, Tspo                     |
| GO:0070507 | regulation of microtubule cytoskeleton organization | 24h          | 4 | Efna5, Efna5 (ENSMUSG00000090425), Eph3, Hsph1 |
| GO:0033762 | response to glucagon stimulus                       | 24h          | 4 | Gcg, Gng2, Gng4, Prkar2a                       |
| GO:0032570 | response to progesterone stimulus                   | 6h, 12h, 24h | 4 | Fos, Fosl2, Thbs1, Tspo                        |
| GO:0051403 | stress-activated MAPK cascade                       | 6h, 12h, 24h | 4 | Fos, Myd88, Rps6ka5, Trib1                     |
| GO:0008063 | Toll signaling pathway                              | 12h, 24h     | 4 | Fos, Myd88, Nfkb1a, Rps6ka5                    |
| GO:0046631 | alpha-beta T cell activation                        | 12h, 24h     | 3 | Bcl11b, Dock2, Gadd45g                         |
| GO:0048708 | astrocyte differentiation                           | 24h          | 3 | Gfap, Lif, Vim                                 |
| GO:0031103 | axon regeneration                                   | 24h          | 3 | Ctnna1, Tnc, Tspo                              |
| GO:0050829 | defense response to Gram-negative bacterium         | 24h          | 3 | Lyz1, Lyz2, Serpine1                           |
| GO:0050830 | defense response to Gram-positive bacterium         | 24h          | 3 | Lyz1, Lyz2, Myd88                              |
| GO:0030218 | erythrocyte differentiation                         | 24h          | 3 | Dyrk3, Id2, Mfsd7b                             |
| GO:0007215 | glutamate receptor signaling pathway                | 12h, 24h     | 3 | Gria3, Grm1, Grm8                              |
| GO:0050819 | negative regulation of coagulation                  | 12h, 24h     | 3 | Anxa2, Pros1, Serpine1                         |
| GO:0046888 | negative regulation of hormone secretion            | 12h, 24h     | 3 | Crh, Il11, Lif                                 |
| GO:0043271 | negative regulation of ion transport                | 12h, 24h     | 3 | Akap5, Calca, Icam1                            |
| GO:0045932 | negative regulation of muscle contraction           | 6h, 24h      | 3 | Calca, Kcnma1, Rgs2                            |

|            |                                                            |          |   |                       |
|------------|------------------------------------------------------------|----------|---|-----------------------|
| GO:0034763 | negative regulation of transmembrane transport             | 24h      | 3 | Nfkbia, Thbs1, Wwtr1  |
| GO:0018149 | peptide cross-linking                                      | 24h      | 3 | Bgn, Tgm2, Thbs1      |
| GO:0046850 | regulation of bone remodeling                              | 24h      | 3 | Calca, Itgav, Spp1    |
| GO:0032652 | regulation of interleukin-1 production                     | 24h      | 3 | Calca, Hspb1, S1pr3   |
| GO:0032677 | regulation of interleukin-8 production                     | 12h, 24h | 3 | Calca, Klf4, Serpine1 |
| GO:0010743 | regulation of macrophage derived foam cell differentiation | 24h      | 3 | Itgav, Msr1, Nfkbia   |
| GO:2000177 | regulation of neural precursor cell proliferation          | 24h      | 3 | Ctnna1, Id2, Lrrk2    |
| GO:0045428 | regulation of nitric oxide biosynthetic process            | 12h, 24h | 3 | Icam1, Ptx3, Tspo     |
| GO:0033688 | regulation of osteoblast proliferation                     | 24h      | 3 | Cyr61, Eif2ak2, Itgav |
| GO:2000377 | regulation of reactive oxygen species metabolic process    | 12h, 24h | 3 | Cdkn1a, Thbs1, Tspo   |
| GO:0010226 | response to lithium ion                                    | 12h, 24h | 3 | Gria3, Id2, Pla2g4a   |
| GO:0033280 | response to vitamin D                                      | 24h      | 3 | Pla2g4a, Spp1, Tnc    |
| GO:0043277 | apoptotic cell clearance                                   | 24h      | 2 | Itgav, Tgm2           |
| GO:0014002 | astrocyte development                                      | 24h      | 2 | Gfap, Vim             |
| GO:0060602 | branch elongation of an epithelium                         | 24h      | 2 | Rdh10, Tnc            |
| GO:0002544 | chronic inflammatory response                              | 12h, 24h | 2 | Il1rn, Thbs1          |
| GO:0042089 | cytokine biosynthetic process                              | 24h      | 2 | Gadd45g, Myd88        |
| GO:0001660 | fever generation                                           | 24h      | 2 | Epha3, Il1rn          |
| GO:0035329 | hippo signaling cascade                                    | 24h      | 2 | Amotl1, Wwtr1         |
| GO:0007019 | microtubule depolymerization                               | 24h      | 2 | Kif18a, Nedd1         |

|            |                                                                                            |          |   |                 |
|------------|--------------------------------------------------------------------------------------------|----------|---|-----------------|
| GO:0008045 | motor axon guidance                                                                        | 12h, 24h | 2 | Chn1, Epha4     |
| GO:0032369 | negative regulation of lipid transport                                                     | 24h      | 2 | Itgav, Thbs1    |
| GO:0070571 | negative regulation of neuron projection regeneration                                      | 12h, 24h | 2 | Epha4, Spp1     |
| GO:0014003 | oligodendrocyte development                                                                | 24h      | 2 | Cd9, Id2        |
| GO:0010770 | positive regulation of cell morphogenesis involved in differentiation                      | 24h      | 2 | Lif, Wwtr1      |
| GO:0050820 | positive regulation of coagulation                                                         | 12h, 24h | 2 | Serpine1, Thbs1 |
| GO:1900048 | positive regulation of hemostasis                                                          | 12h, 24h | 2 | Serpine1, Thbs1 |
| GO:0035774 | positive regulation of insulin secretion involved in cellular response to glucose stimulus | 24h      | 2 | Crh, Gcg        |
| GO:0031340 | positive regulation of vesicle fusion                                                      | 24h      | 2 | Anxa2, Pla2g4a  |
| GO:0031077 | post-embryonic camera-type eye development                                                 | 24h      | 2 | Bcl11b, Klf4    |
| GO:0022417 | protein maturation by protein folding                                                      | 24h      | 2 | Fkbp1b, Wfs1    |
| GO:0032344 | regulation of aldosterone metabolic process                                                | 24h      | 2 | Dkk3, Kcnma1    |
| GO:0048679 | regulation of axon regeneration                                                            | 24h      | 2 | Epha4, Spp1     |
| GO:0051459 | regulation of corticotropin secretion                                                      | 24h      | 2 | Crh, Lif        |
| GO:0060251 | regulation of glial cell proliferation                                                     | 24h      | 2 | Gfap, Tspo      |
| GO:0071675 | regulation of mononuclear cell migration                                                   | 12h, 24h | 2 | C3ar1, Thbs1    |

|            |                                                        |          |   |                                      |
|------------|--------------------------------------------------------|----------|---|--------------------------------------|
| GO:0070570 | regulation of neuron projection regeneration           | 24h      | 2 | Epha4, Spp1                          |
| GO:0048385 | regulation of retinoic acid receptor signaling pathway | 24h      | 2 | Tgif1, Zfp536                        |
| GO:0001914 | regulation of T cell mediated cytotoxicity             | 24h      | 2 | Hspa1b, Pvr                          |
| GO:0031338 | regulation of vesicle fusion                           | 24h      | 2 | Anxa2, Pla2g4a                       |
| GO:0060087 | relaxation of vascular smooth muscle                   | 24h      | 2 | Kcnma1, Rgs2                         |
| GO:0043330 | response to exogenous dsRNA                            | 24h      | 2 | Eif2ak2, Nfkbia                      |
| GO:0052572 | response to host immune response                       | 24h      | 2 | Eif2ak2, Tlr1                        |
| GO:0033197 | response to vitamin E                                  | 24h      | 2 | Eif2ak2, Fkbp1b                      |
| GO:0031290 | retinal ganglion cell axon guidance                    | 24h      | 2 | Efna5, Efna5<br>(ENSMUSG00000090425) |
| GO:0031529 | ruffle organization                                    | 24h      | 2 | Arf6, Plek                           |
| GO:0002286 | T cell activation involved in immune response          | 12h, 24h | 2 | Gadd45g, Icam1                       |
| GO:0060707 | trophoblast giant cell differentiation                 | 24h      | 2 | Itgav, Lif                           |

---
