# Supplementary material for: Glial responses during epileptogenesis in Mus musculus point to potential therapeutic targets
Source: PubMed Central journal article supplement (PMC6095496; doi:10.1371/journal.pone.0201742), 2018-08-16
Supplement: pone.0201742.s012.pdf [file pone.0201742.s012.pdf]

**Table S8:** Significantly changed GO Molecular Functions (level 6) at 6 hours post KA treatment, using the "Mapping to ontologies (TRANSPATH®)" workflow. All significantly changed genes at 6h were considered, and a threshold of p-value <0.05 was applied.

| Gene Ontology Category ID | GO-Molecular Function (level 6)                                                                                                                              | Time point(s) of enrichment | Number of significantly changed genes at 6h | Symbol of significantly changed genes at 6h                                                                                                                                                                                        |
|---------------------------|--------------------------------------------------------------------------------------------------------------------------------------------------------------|-----------------------------|---------------------------------------------|------------------------------------------------------------------------------------------------------------------------------------------------------------------------------------------------------------------------------------|
| GO:0046914                | transition metal ion binding                                                                                                                                 | 6h, 12h                     | 31                                          | Adamts1, Arhgef2, Arih2, Baz1a, Bcl11b, Cyp51, Egr4, Foxp1, Gucy1b3, Kdm4b, Mt1, Nr3c2, Nr4a1, Nr4a2, Nr4a3, Plagl1, Ptgs2, Rnf217, Rorb, Siah2, Tiparp, Usp45, Zc3h12c, Zdbf2, Zeb2, Zfp12, Zfp292, Zfp36, Zfp462, Zfp763, Zswim6 |
| GO:0044212                | transcription regulatory region DNA binding                                                                                                                  | 6h, 12h                     | 9                                           | Bcl11b, E2f3, Egr4, Fos, Jun, Mterfd3, Neurod2, Per1, Smad7                                                                                                                                                                        |
| GO:0022836                | gated channel activity                                                                                                                                       | 6h, 12h, 24h                | 8                                           | Cacna1h, Gabrg2, Kcnf1, Kcnip2, Kcns2, Kcnv1, Kctd4, Kctd6                                                                                                                                                                         |
| GO:0003690                | double-stranded DNA binding                                                                                                                                  | 6h, 12h                     | 7                                           | Fos, Fosb, Foxk1, Foxp1, Jun, Junb, Nr3c2                                                                                                                                                                                          |
| GO:0016791                | phosphatase activity                                                                                                                                         | 6h                          | 7                                           | Acpl2, Dusp1, Dusp5, Mtmr7, Nanp, Ptpn12, Ptpn3                                                                                                                                                                                    |
| GO:0008201                | heparin binding                                                                                                                                              | 6h, 12h, 24h                | 6                                           | Adamts1, Cyr61, Gpnmb, Hbegf, Selp, Smoc2                                                                                                                                                                                          |
| GO:0001077                | RNA polymerase II core promoter proximal region sequence-specific DNA binding transcription factor activity involved in positive regulation of transcription | 6h                          | 5                                           | Bcl11b, Jun, Nr4a1, Nr4a3, Zfp292                                                                                                                                                                                                  |
| GO:0005088                | Ras guanyl-nucleotide exchange factor activity                                                                                                               | 6h, 12h                     | 4                                           | Arhgef2, Mcf2l, Plekhg5, Tiam1                                                                                                                                                                                                     |

|            |                                                                        |         |   |                         |
|------------|------------------------------------------------------------------------|---------|---|-------------------------|
| GO:0000976 | transcription<br>regulatory region<br>sequence-specific<br>DNA binding | 6h      | 4 | Bcl11b, Egr4, Jun, Per1 |
| GO:0001102 | RNA polymerase II<br>activating<br>transcription factor<br>binding     | 6h, 12h | 2 | Cited2, Jun             |

---
