# Supplementary material for: Glial responses during epileptogenesis in Mus musculus point to potential therapeutic targets
Source: PubMed Central journal article supplement (PMC6095496; doi:10.1371/journal.pone.0201742), 2018-08-16
Supplement: pone.0201742.s013.pdf [file pone.0201742.s013.pdf]

**Table S9:** Significantly changed GO Molecular Functions (level 6) at 12 hours post KA treatment, using the "Mapping to ontologies (TRANSPATH®)" workflow. All significantly changed genes at 12h were considered, and a threshold of p-value <0.05 was applied.

| Gene Ontology Category ID | GO-Molecular Function (level 6) | Time point(s) of enrichment | Number of significantly changed genes at 12h | Symbol of significantly changed genes at 12h                                                                                                                                                                                                                                                                                                                                                                                                                                                                                                      |
|---------------------------|---------------------------------|-----------------------------|----------------------------------------------|---------------------------------------------------------------------------------------------------------------------------------------------------------------------------------------------------------------------------------------------------------------------------------------------------------------------------------------------------------------------------------------------------------------------------------------------------------------------------------------------------------------------------------------------------|
| GO:0032555                | purine ribonucleotide binding   | 12h, 24h                    | 75                                           | Abcc8, Ak5, Akt3, Arf2, Arl15, Arl4d, Atp13a5, Atp2b1, Atp2b2, Atrx, Cacna1b, Camk1d, Camk2a, Camk2b, Camkk2, Dclk1, Dclk3, Dgkh, Diras1, Dnm1, Dnm3, Epha3, Epha4, Eprs, Gbp2, Gem, Gucy1b3, Hspa12a, Hspa1a, Hspa1b, Hspa5, Hsph1, Itpka, Kalrn, Map2k3, Map3k6, Map4k4, Mapk4, Met, Morc4, Myo5b, Myo9b, Pak6, Pde1a, Pdk4, Pik3c3, Pim1, Pip4k2c, Pmvk, Prkar2a, Prkcc, Prkx, Ptk2b, Rab27b, Rab9b, Rasl11a, Rhoc, Rhoj, Ripk1, Rnd3, Rnf112, Rps6ka3, Rps6ka5, Rps6ka6, Rrad, Sept6, Sik2, Speg, Sphk1, Srr, Srxn1, Tgm2, Tlk2, Tnik, Trim23 |
| GO:0046914                | transition metal ion binding    | 6h, 12h                     | 71                                           | Adamts1, Adamts9, Alox12b, Ar, Arhgef2, Arih2, Atrx, Bach1, Baz1a, Bcl11a, Bcl11b, Birc3, Car7, Ch25h, Cpn1, Cyba, Cybb, Cyld, Cyp4x1, Cyp7b1, Egr2, Fblim1, Fbxo41, Glis3, Gucy1b3, Hmox1, Klf5, Klf6, Lancl1, Lhx9, Limd2, Lmo1, Lonrf3, Morc4, Mt2, Mtfp1, Myo9b, Nos3, Nr1d2, Nr2c2, Nr3c2, Nr4a2, Pcgf5, Pdlim1, Pdlim4, Pdlim7, Pglyrp1, Pim1, Plagl1, Pnkd, Prkcc, Ptgs2, Rnf112, Rnf170, Rnf217, Rora, Rorb, Siah2, Tiparp, Tll1, Trim23, Zcchc7, Zdhhc18, Zeb2, Zfp239, Zfp295, Zfp36, Zfp462, Zfp516, Zkscan4, Zmiz1                    |

|            |                                           |              |    |                                                                                                                                                                                                                                                                                                             |
|------------|-------------------------------------------|--------------|----|-------------------------------------------------------------------------------------------------------------------------------------------------------------------------------------------------------------------------------------------------------------------------------------------------------------|
| GO:0005509 | calcium ion binding                       | 12h, 24h     | 43 | Anxa2, Anxa3, Atp2b2, Camkk2, Capn3, Cd93, Cdh8, Edem1, Efhd2, Fbn1, Grin1, Hpca, Hspa5, Kcnip2, Kcnip4, Lrp8, Matn2, Megf9, Ncald, Nell1, Nrnx1, Pcdh19, Pcdh8, Pclo, Pitpnm2, Plce1, Ppp3ca, Pros1, Pvalb, Rasgrp1, Ryr2, S100a10, S100a11, Slit1, Smoc2, Srr, Stat3, Syt7, Tesc, Tgm2, Thbs1, Tll1, Tpm4 |
| GO:0004672 | protein kinase activity                   | 12h, 24h     | 38 | Akt3, Bdnf, Camk1d, Camk2a, Camk2b, Camkk2, Ccl2, Cdkn1a, Crim1, Dclk1, Dclk3, Eng, Epha3, Epha4, Itpka, Kalrn, Kcnh3, Map2k3, Map3k6, Map4k4, Mapk4, Met, Pak6, Pdk4, Pik3c3, Pim1, Prkcc, Prkx, Ptk2b, Ripk1, Rps6ka3, Rps6ka5, Rps6ka6, Sik2, Speg, Stat3, Tlk2, Tnik                                    |
| GO:0005216 | ion channel activity                      | 12h, 24h     | 32 | Abcc8, Ano3, Cacna1b, Cacna1d, Cacna1h, Cybb, Fxyd5, Fxyd7, Gabra5, Gabrg2, Gria1, Gria3, Grin1, Kcna2, Kcnab1, Kcnc1, Kcnc2, Kcnf1, Kcnh3, Kcnip2, Kcnip4, Kcnj3, Kcnj9, Kcnq5, Kctd4, Nalcn, Ryr2, Scn1a, Scn2a1, Scn3b, Shroom2, Slc24a2                                                                 |
| GO:0008324 | cation transmembrane transporter activity | 12h, 24h     | 31 | Abcc8, Atp2b1, Atp2b2, Cacna1b, Cacna1d, Cacna1h, Grin1, Kcna2, Kcnab1, Kcnc1, Kcnc2, Kcnf1, Kcnh3, Kcnip2, Kcnip4, Kcnj3, Kcnj9, Kcnq5, Kctd4, Nalcn, Ryr2, Scn1a, Scn2a1, Scn3b, Shroom2, Slc10a6, Slc12a5, Slc24a2, Slc39a10, Slc5a3, Slc6a8                                                             |
| GO:0022836 | gated channel activity                    | 6h, 12h, 24h | 28 | Abcc8, Cacna1b, Cacna1d, Cacna1h, Cybb, Gabra5, Gabrg2, Gria1, Gria3, Grin1, Kcna2, Kcnab1, Kcnc1, Kcnc2, Kcnf1, Kcnh3, Kcnip2, Kcnip4, Kcnj3, Kcnj9, Kcnq5, Kctd4, Nalcn, Ryr2, Scn1a, Scn2a1, Scn3b, Shroom2                                                                                              |
| GO:0019901 | protein kinase binding                    | 12h, 24h     | 25 | Akap5, Akt3, Camk2n1, Cd44, Cyld, Errfi1, Gria1, Hspb1, Map2k3, Mapk4, Mapk8ip2, Mef2a, Msn, Nbea, Nell1, Nfatc1, Pik3r1, Plek, Prkar2a, Ptk2b, Rps6ka3, Ryr2, Stat3, Vim, Zfp36                                                                                                                            |

|            |                                                |              |    |                                                                                                                                               |
|------------|------------------------------------------------|--------------|----|-----------------------------------------------------------------------------------------------------------------------------------------------|
| GO:0019001 | guanyl nucleotide binding                      | 12h, 24h     | 21 | Arf2, Arl15, Arl4d, Diras1, Dnm1, Dnm3, Gbp2, Gem, Gucy1b3, Pde1a, Rab27b, Rab9b, Rasl11a, Rhoc, Rhoj, Rnd3, Rnf112, Rad, Sept6, Tgm2, Trim23 |
| GO:0044212 | transcription regulatory region DNA binding    | 6h, 12h      | 17 | Ar, Bcl11b, Bmyc, Cebpdl, Dbp, Egr2, Fos, Hmgb2, Jun, Mef2a, Mterfd3, Myc, Ncor1, Nfatc1, Nfil3, Stat3, Tal1                                  |
| GO:0003690 | double-stranded DNA binding                    | 6h, 12h      | 10 | Fos, Fosb, Fosl2, Foxk1, Hmgb2, Jun, Junb, Klf6, Myc, Nr3c2                                                                                   |
| GO:0000287 | magnesium ion binding                          | 12h          | 10 | Foxk1, Gem, Map3k6, Rps6ka3, Rps6ka5, Rps6ka6, Sik2, Sphk1, Srr, Tesc                                                                         |
| GO:0005088 | Ras guanyl-nucleotide exchange factor activity | 6h, 12h      | 9  | Arhgef2, Arhgef25, Arhgef4, Kalrn, Kifap3, Mcf2l, Rasgef1b, Rasgrf2, Rasgrp1                                                                  |
| GO:0008201 | heparin binding                                | 6h, 12h, 24h | 9  | Adamts1, Ccl2, Ccl7, Col25a1, Cyr61, Hbegf, Nell1, Smoc2, Thbs1                                                                               |
| GO:0035257 | nuclear hormone receptor binding               | 12h          | 8  | Ar, Grm1, Hmga1, Med13, Ncor1, Nrip1, Pik3r1, Stat3                                                                                           |
| GO:0031625 | ubiquitin protein ligase binding               | 12h          | 8  | Egr2, Eif4e2, Hspa1a, Hspa1b, Hspa5, Nfkbia, Pik3r1, Prkar2a                                                                                  |
| GO:0042379 | chemokine receptor binding                     | 12h          | 7  | Ccl11, Ccl2, Ccl4, Ccl6, Ccl7, Ccl9, Stat3                                                                                                    |
| GO:0008009 | chemokine activity                             | 12h          | 6  | Ccl11, Ccl2, Ccl4, Ccl6, Ccl7, Ccl9                                                                                                           |
| GO:0008375 | acetylglucosaminyltransferase activity         | 12h          | 6  | B3gnt1, B3gnt5, Extl1, Extl2, Gcnt2, Mgat5b                                                                                                   |
| GO:0004869 | cysteine-type endopeptidase inhibitor activity | 12h          | 5  | Bcl2a1d, Cstb, Ctla2b, Hspa5, Rps6ka3                                                                                                         |
| GO:0004983 | neuropeptide Y receptor activity               | 12h          | 4  | Gpr83, Npy, Npy2r, Npy5r                                                                                                                      |
| GO:0005184 | neuropeptide hormone activity                  | 12h          | 4  | Cartpt, Crh, Npy, Pdyn                                                                                                                        |
| GO:0005100 | Rho GTPase activator activity                  | 12h          | 4  | Arhgap15, Errfi1, Jun, Myo9b                                                                                                                  |

|            |                                                                        |     |   |                      |
|------------|------------------------------------------------------------------------|-----|---|----------------------|
| GO:0046965 | retinoid X<br>receptor binding                                         | 12h | 3 | Hmga1, Ncor1, Nrip1  |
| GO:0004970 | ionotropic<br>glutamate<br>receptor activity                           | 12h | 3 | Gria1, Gria3, Grin1  |
| GO:0031420 | alkali metal ion<br>binding                                            | 12h | 3 | Capn3, Scn1a, Scn2a1 |
| GO:0001105 | RNA polymerase II<br>transcription<br>coactivator<br>activity          | 12h | 3 | Cited2, Mef2a, Psip1 |
| GO:0001102 | RNA polymerase II<br>activating<br>transcription<br>factor binding     | 12h | 3 | Cited2, Egr2, Jun    |
| GO:0005154 | epidermal growth<br>factor receptor<br>binding                         | 12h | 3 | Areg, Cd44, Hbegf    |
| GO:0001639 | PLC activating G-<br>protein coupled<br>glutamate<br>receptor activity | 12h | 2 | Grm1, Grm5           |
| GO:0035256 | G-protein coupled<br>glutamate<br>receptor binding                     | 12h | 2 | Homer1, Homer2       |
| GO:0004985 | opioid receptor<br>activity                                            | 12h | 2 | Opcml, Oprl1         |
| GO:0008140 | cAMP response<br>element binding<br>protein binding                    | 12h | 2 | Crem, Crtc1          |
| GO:0016175 | superoxide-<br>generating<br>NADPH oxidase<br>activity                 | 12h | 2 | Cyba, Cybb           |
| GO:0042834 | peptidoglycan<br>binding                                               | 12h | 2 | Pglyrp1, Tlr2        |
| GO:0017040 | ceramidase<br>activity                                                 | 12h | 2 | Gba2, Lct            |

---
