# Supplementary material for: Glial responses during epileptogenesis in Mus musculus point to potential therapeutic targets
Source: PubMed Central journal article supplement (PMC6095496; doi:10.1371/journal.pone.0201742), 2018-08-16
Supplement: pone.0201742.s015.pdf [file pone.0201742.s015.pdf]

**Table S11:** Significantly changed GO Cellular Components (level 5) at 12 hours post KA treatment, using the "Mapping to ontologies (TRANSPATH®)" workflow. All significantly changed genes at 12h were considered, and a threshold of p-value <0.05 was applied.

| Gene Ontology Category ID | GO-Cellular Component (level 5) | Time point(s) of enrichment | Number of significantly changed genes at 12h | Symbol of significantly changed genes at 12h                                                                                                                                                                                                                                                                                                                                                                                                                                                                                                                                                                                                                                                                                                                                                                                                                                                                                                                                                                                                                                                                         |
|---------------------------|---------------------------------|-----------------------------|----------------------------------------------|----------------------------------------------------------------------------------------------------------------------------------------------------------------------------------------------------------------------------------------------------------------------------------------------------------------------------------------------------------------------------------------------------------------------------------------------------------------------------------------------------------------------------------------------------------------------------------------------------------------------------------------------------------------------------------------------------------------------------------------------------------------------------------------------------------------------------------------------------------------------------------------------------------------------------------------------------------------------------------------------------------------------------------------------------------------------------------------------------------------------|
| GO:0005634                | nucleus                         | 6h, 12h, 24h                | 198                                          | 2310046A06Rik, 2900092E17Rik, Abt1, Aff1, Ahnak, Akt3, Anks1b, Ar, Areg, Arhgap39, Arih2, Arl4d, Atrx, Bach1, Baz1a, Bcl11a, Bcl11b, Bcl3, Birc3, Bmyc, Cacna1h, Camk1d, Capg, Capn3, Ccdc86, Cd44, Cdkn1a, Cdyl, Cebp, Cenpw, Ciapin1, Cited2, Crem, Crtc1, Csrnp1, Cstb, Dbp, Dclk3, Dgkh, Dnajb1, Dusp1, Eaf1, Eaf2, Egr2, Eif2c2, Eif4ebp1, Ell2, Eng, Errfi1, Etv3, Evc2, Fam120b, Fgf11, Fos, Fosb, Fosl1, Fosl2, Foxk1, Gadd45b, Gadd45g, Glis3, Gltsr2, Grm1, Hist1h1c, Hist1h3f, Hist1h4a, Hmga1, Hmgb2, Hmox1, Hn1l, Hnmt, Hspa1a, Hspa1b, Hspa5, Hspb1, Hsph1, Id2, Ifrd1, Igf2bp2, Il16, Jarid2, Jun, Junb, Kdm6b, Klf5, Klf6, Lancl1, Larp6, Lgals3, Lhx9, Lmna, Lmo1, Lrrfip1, Maff, Magoh, Mapk4, Mbd2, Mbd5, Mcl1, Med13, Mef2a, Msn, Myc, Naf1, Narf, Nat14, Ncor1, Ndufaf3, Nedd9, Neurod6, Nfatc1, Nfe2l2, Nfil3, Nfkb1a, Nfkbiz, Nos3, Npas4, Nr1d2, Nr2c2, Nr3c2, Nr4a2, Nrip1, Nrip2, Pak6, Pcgf5, Pdcd4, Pde1a, Pde4b, Phlda1, Pik3r1, Pim1, Pip4k2c, Pkp2, Plagl1, Plin2, Pnkd, Pnma2, Pop4, Ppp3ca, Prkcc, Prkx, Psip1, Ptgs2, Ptk2b, Pvr, Rabgap1l, Rasl11a, Rbfox1, Rbfox3, Rcan1, Rdh10, |

|            |                         |     |     |                                                                                                                                                                                                                                                                                                                                                                                                                                                                                                                                                                                                                                                                                                                                                                                                                                                                                                                                                                                                                                                                                                                                             |
|------------|-------------------------|-----|-----|---------------------------------------------------------------------------------------------------------------------------------------------------------------------------------------------------------------------------------------------------------------------------------------------------------------------------------------------------------------------------------------------------------------------------------------------------------------------------------------------------------------------------------------------------------------------------------------------------------------------------------------------------------------------------------------------------------------------------------------------------------------------------------------------------------------------------------------------------------------------------------------------------------------------------------------------------------------------------------------------------------------------------------------------------------------------------------------------------------------------------------------------|
| GO:0016021 | integral to<br>membrane | 12h | 191 | <p>2200002K05Rik, A730017C20Rik, AI464131, AI593442, Abcc8, Adcyap1r1, Ano3, Areg, Art3, Aspnd2, Atp13a5, Atp2b1, Atp2b2, B3gat1, B3gnt1, B3gnt5, Bai3, C3ar1, Cacna1b, Cacna1d, Cacna1h, Cadm2, Caly, Cav1, Cd44, Cd68, Cd93, Cdh8, Cend1, Ch25h, Chst12, Cldn22, Col25a1, Crim1, Cuzd1, Cybb, Cypr1, D130043K22Rik, Dclk1, Disp2, Ecscr, Edem1, Eln2, Elovl1, Emp1, Eng, Epha3, Epha4, Evc2, Extl1, Extl2, Faah, Faim2, Fam163b, Fam23a, Fam57b, Fndc3b, Fndc5, Fxyd5, Fxyd7, Gabra5, Gabrg2, Gba2, Gcnt2, Ggt7, Glt8d2, Golm1, Gp49a, Gpr12, Gpr155, Gpr19, Gpr83, Gramd1b, Gria1, Gria3, Grin1, Grm1, Grm5, Hbegf, Homer1, Hspa5, Htr1a, Icam1, Icam5, Ier3, Igsf8, Il13ra1, Il17ra, Il1rap, Kcna2, Kcnab1, Kcnc1, Kcnc2, Kcnf1, Kcnh3, Kcnj3, Kcnj9, Kcnq5, Kitl, Lancl1, Lct, Lilrb4, Lmbr1, Lrp8, Lrrc4b, Lrrn2, Ltbr, Mall, Mcl1, Megf9, Met, Mfsd4, Mfsd6, Mgat5b, Mpp2, Ms4a6d, Msr1, Mtfp1, Nalcn, Nat14, Nat8l, Nceh1, Ndst4, Nlgn3, Npy2r, Npy5r, Nrnx1, Nrnx3, Opcml, Oprl1, Orai2, Orai3, Osmr, Paqr7, Pcdh19, Pcdh8, Pcnx, Pgbd5, Pitpnm2, Pkp2, Plxna1, Podxl, Prrt2, Prrt3, Ptger2, Pvr, Rdh10, Rnf170, Rnf217, Ryr2,</p> |
|------------|-------------------------|-----|-----|---------------------------------------------------------------------------------------------------------------------------------------------------------------------------------------------------------------------------------------------------------------------------------------------------------------------------------------------------------------------------------------------------------------------------------------------------------------------------------------------------------------------------------------------------------------------------------------------------------------------------------------------------------------------------------------------------------------------------------------------------------------------------------------------------------------------------------------------------------------------------------------------------------------------------------------------------------------------------------------------------------------------------------------------------------------------------------------------------------------------------------------------|

|            |                              |          |    |                                                                                                                                                                                                                                                                                                                                                                                                                                                                                                                                                                                                                                                                                                                                                  |
|------------|------------------------------|----------|----|--------------------------------------------------------------------------------------------------------------------------------------------------------------------------------------------------------------------------------------------------------------------------------------------------------------------------------------------------------------------------------------------------------------------------------------------------------------------------------------------------------------------------------------------------------------------------------------------------------------------------------------------------------------------------------------------------------------------------------------------------|
| GO:0005829 | cytosol                      | 12h, 24h | 99 | Acot3, Ak5, Akap5, Akt3, Aldh1a3, Ampd3, Arhgap12, Arhgap15, Arhgap20, Arhgap39, Arhgef2, Arhgef25, Arhgef4, Atp2b2, Bach1, Bag3, Camk2a, Camk2b, Capn3, Cav1, Cdkn1a, Ch25h, Chac1, Chn1, Cyld, Dnajc6, Dnm3, Eif2c2, Eif4e2, Eif4ebp1, Eprs, Errfi1, Etf1, Fabp3, Fblim1, Fosl1, Gbp2, Gmpr, Gria1, Gucy1b3, Hmga1, Hmox1, Hspa1a, Hspa1b, Hspb1, Id2, Igf2bp2, Jun, Kalrn, Kifap3, Magoh, Map2k3, Mcf2l, Msr1, Myo9b, Nbea, Ncald, Nfe2l2, Nfkb1a, Nmt1, Nos3, Odc1, Pcd4, Pde1a, Pde4b, Pik3c3, Pik3r1, Plce1, Plek, Pmvk, Ppp3ca, Prkar2a, Prkcc, Psip1, Ptk2b, Ptpn12, Rasgrf2, Rasgrp1, Rgs2, Rgs4, Rhoc, Rhoj, Rilpl1, Ripk1, Rps6ka3, Rps6ka6, Sat1, Siah2, Socs3, Sphk1, Srxn1, Stat3, Sult2b1, Tgm2, Tpm4, Tubgcp2, Vim, Zfp36, Zwint |
| GO:0005624 | membrane fraction            | 12h, 24h | 64 | Anxa2, Atp2b2, Bag3, Cacna1b, Camk2n1, Cav1, Cd68, Cntn1, Cyp4x1, Cyp7b1, Dsp, Emp1, Eng, Fos, Fosl1, Gba2, Gcnt2, Gria1, Gria3, Grin1, Grm1, Grm5, Hmox1, Hnmt, Homer1, Kcnip4, Lct, Lin7b, Lrp8, Met, Mpp2, Myo5b, Nat8l, Ncald, Nceh1, Npy2r, Nrnx1, Pik3r1, Plce1, Plek, Plxna1, Ppp3ca, Prkar2a, Prkcc, Ptgs2, Rasgrp1, Rdh10, Rgs4, Rhoc, Ryr2, Samd4, Scn1a, Scn2a1, Siah2, Slc16a1, Slc24a2, Sphk1, Sstr2, Synpr, Syt7, Tmem59l, Tspan13, Vamp1, Zwint                                                                                                                                                                                                                                                                                   |
| GO:0031226 | intrinsic to plasma membrane | 12h, 24h | 58 | Adcyap1r1, Art3, Atp2b1, C3ar1, Cacna1d, Caly, Cav1, Cd44, Cdh8, Col25a1, Cybb, Dclk1, Epha3, Epha4, Gabra5, Gabrg2, Gfra1, Ggt7, Golm1, Gpr12, Gpr19, Grin1, Grm1, Grm5, Hbegf, Homer1, Htr1a, Icam1, Icam5, Il17ra, Il1rap, Lancl1, Lct, Met, Mpp2, Msr1, Nlgn3, Npy2r, Npy5r, Nrnx1, Nrnx3, Opcml, Oprl1, Osmr, Pcdh8, Podxl, Ptger2, S1pr3, Slc14a1, Slc5a3, Slc6a8, Sstr2, Tlr2, Tm4sf1, Tnfrsf1a, Tpbp, Tspan13, Vamp1                                                                                                                                                                                                                                                                                                                     |

|            |                                      |              |    |                                                                                                                                                                                                                                                                                                                                                                           |
|------------|--------------------------------------|--------------|----|---------------------------------------------------------------------------------------------------------------------------------------------------------------------------------------------------------------------------------------------------------------------------------------------------------------------------------------------------------------------------|
| GO:0005730 | nucleolus                            | 12h          | 54 | Abt1, Akt3, Arl4d, Bach1, Bmyc, Capg, Ccdc86, Ciapin1, Crtc1, Csrnp1, Cstb, Dnajb1, Dtd1, Eaf2, Ell2, Eng, Fos, Fosl2, Foxk1, Gltscr2, Hmgb2, Hmox1, Hnmt, Hsph1, Id2, Junb, Klf5, Larp6, Lmo1, Mbd2, Msn, Myc, Nos3, Nr2c2, Pdcd4, Phlda1, Pip4k2c, Pnma2, Podxl, Pop4, Ppp3ca, Psip1, Ptk2b, Pvr, Rasl11a, Rgs2, Rilpl1, Sap18, Stat3, Tnik, Wwtr1, Ypel4, Zcchc7, Zeb2 |
| GO:0005654 | nucleoplasm                          | 12h          | 35 | Akt3, Ar, Bmyc, Camk2a, Camk2b, Cdkn1a, Dusp1, Eaf2, Fos, Hmga1, Hmgb2, Jun, Lmna, Maff, Magoh, Map2k3, Mcl1, Med13, Mef2a, Myc, Ncor1, Nr1d2, Nr2c2, Nr3c2, Nr4a2, Psip1, Rora, Rorb, Rps6ka3, Rps6ka5, Rps6ka6, Snrpa1, Srsf12, Stat3, Tinf2                                                                                                                            |
| GO:0016023 | cytoplasmic membrane-bounded vesicle | 6h, 12h, 24h | 29 | 1190002N15Rik, Anxa2, Anxa3, Arc, Bdnf, Capg, Cartpt, Cd93, Cuzd1, Cyba, Cybb, Dnm3, Grin1, Hspa5, Mall, Nlgn3, Nrnx1, Pclo, Pcsk1, Pcsk2, Rab27b, Scg2, Sept6, Sphk1, Srgn, Synpr, Syt17, Syt7, Thbs1                                                                                                                                                                    |
| GO:0030425 | dendrite                             | 12h, 24h     | 27 | Anxa3, Ar, Atp2b2, Cacna1b, Cacna1h, Camk2a, Camk2n1, Cnn3, Cyba, Cybb, Epha4, Gabra5, Gria1, Gria3, Grin1, Grm1, Homer1, Homer2, Kcnip2, Kcnip4, Lrp8, Met, Pcdh8, Pcsk1, Prkcc, Synpo, Zwint                                                                                                                                                                            |
| GO:0048471 | perinuclear region of cytoplasm      | 12h, 24h     | 23 | Akap5, Anxa2, Bcl3, Cav1, Cyld, Dnm3, Hmgb2, Hspa1a, Hspa1b, Hspa5, Kalrn, Lmna, Myo5b, Myo9b, Ncor1, Pcsk1, Pde4b, Prkar2a, Prkcc, Ptk2b, Spp1, Tlk2, Tnik                                                                                                                                                                                                               |
| GO:0030424 | axon                                 | 12h, 24h     | 17 | Anxa3, Ar, Cadm2, Epha4, Gabrg2, Grm1, Myc, Ptk2b, Pvalb, Rhoc, Scn1a, Scn2a1, Sphk1, Stmn4, Synpo, Tnfrsf1a, Vim                                                                                                                                                                                                                                                         |
| GO:0030659 | cytoplasmic vesicle membrane         | 12h, 24h     | 17 | Abcc8, Anxa3, Caly, Camk2a, Camk2b, Cav1, Cltb, Cuzd1, Gria1, Gria3, Msn, Nos3, Phlda1, Rab27b, Synpr, Syt7, Vamp1                                                                                                                                                                                                                                                        |
| GO:0034703 | cation channel complex               | 6h, 12h, 24h | 15 | Cacna1b, Cacna1d, Cacna1h, Kcna2, Kcnc1, Kcnc2, Kcnf1, Kcnip2, Kcnj3, Kcnq5, Kctd4, Ryr2, Scn1a, Scn2a1, Scn3b                                                                                                                                                                                                                                                            |

|            |                                             |              |    |                                                                                                    |
|------------|---------------------------------------------|--------------|----|----------------------------------------------------------------------------------------------------|
| GO:0000785 | chromatin                                   | 12h          | 15 | Ar, Atrx, Cited2, Hist1h3e, Hmga1, Id2, Jun, Junb, Mbd2, Mef2a, Ncor1, Nfatc1, Nfe2l2, Psip1, Tal1 |
| GO:0044309 | neuron spine                                | 12h, 24h     | 13 | Akap5, Anks1b, Arc, Cnn3, Dnm3, Gria1, Gria3, Grin1, Grm1, Grm5, Myo5b, Prosapip1, Synpo           |
| GO:0016324 | apical plasma membrane                      | 12h, 24h     | 13 | Amotl1, Atp2b1, Atp2b2, Cacna1d, Cav1, Cd44, Cyba, Hspa1b, Lct, Msn, Podxl, Rab27b, Shroom2        |
| GO:0008076 | voltage-gated potassium channel complex     | 6h, 12h, 24h | 8  | Kcna2, Kcnc1, Kcnc2, Kcnf1, Kcnip2, Kcnj3, Kcnq5, Kctd4                                            |
| GO:0031256 | leading edge membrane                       | 12h          | 8  | Akap5, Arhgef2, Arhgef4, Gabrg2, Grin1, Kcnc1, Plek, Slc12a5                                       |
| GO:0005923 | tight junction                              | 12h          | 7  | Adcyap1r1, Amotl1, Arhgef2, Cldn22, Lin7b, Shroom2, Synpo                                          |
| GO:0000118 | histone deacetylase complex                 | 12h          | 6  | Mbd2, Ncor1, Nrip1, Sap18, Sap30, Tal1                                                             |
| GO:0005901 | caveola                                     | 12h, 24h     | 6  | Adcyap1r1, Cav1, Hmox1, Lrp8, Nos3, Ptgs2                                                          |
| GO:0031227 | intrinsic to endoplasmic reticulum membrane | 12h          | 6  | Asphd2, Edem1, Elovl1, Extl1, Extl2, Hspa5                                                         |
| GO:0030315 | T-tubule                                    | 12h, 24h     | 5  | Capn3, Kcnj3, Prkar2a, Scn1a, Scn2a1                                                               |
| GO:0032589 | neuron projection membrane                  | 12h, 24h     | 5  | Akap5, Gabrg2, Grin1, Kcnc1, Slc12a5                                                               |
| GO:0060205 | cytoplasmic membrane-bounded vesicle lumen  | 12h, 24h     | 5  | Pros1, Serpine1, Srgn, Thbs1, Timp1                                                                |
| GO:0044298 | cell body membrane                          | 12h          | 3  | Cadm2, Gabra5, Kcnc1                                                                               |
| GO:0001518 | voltage-gated sodium channel complex        | 12h, 24h     | 3  | Scn1a, Scn2a1, Scn3b                                                                               |
| GO:0005891 | voltage-gated calcium channel complex       | 12h          | 3  | Cacna1b, Cacna1d, Cacna1h                                                                          |
| GO:0031981 | nuclear lumen                               | 6h, 12h      | 2  | 2310046A06Rik, Narf                                                                                |
| GO:0043194 | initial segment                             | 12h          | 2  | Scn1a, Scn2a1                                                                                      |
| GO:0005638 | lamin filament                              | 12h          | 2  | Lmna, Narf                                                                                         |

|            |                                                    |          |   |                |
|------------|----------------------------------------------------|----------|---|----------------|
| GO:0030130 | clathrin coat of<br>trans-Golgi<br>network vesicle | 12h      | 2 | Cltb, Ncald    |
| GO:0030935 | sheet-forming<br>collagen                          | 12h      | 2 | Col4a1, Col4a2 |
| GO:0005652 | nuclear lamina                                     | 12h      | 2 | Lmna, Narf     |
| GO:0033268 | node of Ranvier                                    | 12h, 24h | 2 | Scn1a, Scn2a1  |
| GO:0031527 | filopodium<br>membrane                             | 12h, 24h | 2 | Akap5, Msn     |

---
