# Supplementary material for: Glial responses during epileptogenesis in Mus musculus point to potential therapeutic targets
Source: PubMed Central journal article supplement (PMC6095496; doi:10.1371/journal.pone.0201742), 2018-08-16
Supplement: pone.0201742.s016.pdf [file pone.0201742.s016.pdf]

**Table S12:** Significantly changed GO Cellular Components (level 5) at 24 hours post KA treatment, using the "Mapping to ontologies (TRANSPATH®)" workflow. All significantly changed genes at 24h were considered, and a threshold of p-value <0.05 was applied.

| Gene Ontology Category ID | GO-Cellular Component (level 5) | Time point(s) of enrichment | Number of significantly changed genes at 24h | Symbol of significantly changed genes at 24h                                                                                                                                                                                                                                                                                                                                        |
|---------------------------|---------------------------------|-----------------------------|----------------------------------------------|-------------------------------------------------------------------------------------------------------------------------------------------------------------------------------------------------------------------------------------------------------------------------------------------------------------------------------------------------------------------------------------|
| GO:0005829                | cytosol                         | 12h, 24h                    | 52                                           | Agtppb1, Akap5, Ampd3, Arhgef4, Bag3, Cald1, Capn3, Casp8, Cdk14, Cdkn1a, Chn1, Clic4, Ctnna1, Dnm3, Dock2, Eif2ak2, Eif4ebp1, Eprs, Etf1, Fblim1, Fgfr1op, Fkbp1b, Gfap, Gucy1b3, Hspa1b, Hspb1, Id2, Kif18a, Msr1, Myd88, Nedd1, Nfkbia, Nmt1, Odc1, Papss2, Pcd6ip, Pla2g4a, Plek, Prkar2a, Ptpn12, Rars, Rasgrp1, Rfwd2, Rgs2, Rpl12, Srxn1, Stard8, Tgm2, Tub, Uck2, Vim, Yes1 |
| GO:0031226                | intrinsic to plasma membrane    | 12h, 24h                    | 32                                           | Atp8b1, C3ar1, Caly, Cd44, Cd9, Cdh4, Cdh8, Col25a1, Cybb, Dcl1, Efna5, Efna5 (ENSMUSG00000090425), Epha3, Epha4, Fcgr2b, Gpnmb, Grm1, Grm8, Hbegf, Htr1a, Icam1, Itgav, Msr1, Osmr, Pcdh11x, Pcdh8, S1pr3, Sdc1, Slc6a8, Slc7a1, Tlr1, Tpbg                                                                                                                                        |
| GO:0005624                | membrane fraction               | 12h, 24h                    | 26                                           | Anxa2, Arf6, Atp8b1, Bag3, Cald1, Ebna1bp2, Emp1, Eng, Fkbp1b, Fos, Gfap, Gria3, Grm1, Lamp2, Lin7b, Lrrk2, Pla2g4a, Plek, Prkar2a, Rasgrp1, Rdh10, Samd4, Scn2a1, Scn8a (ENSMUSG00000023033), Uck2, Yes1                                                                                                                                                                           |
| GO:0048471                | perinuclear region of cytoplasm | 12h, 24h                    | 12                                           | Akap5, Anxa2, Clic4, Dnm3, Fgfr1op, Hspa1b, Kcnma1, Pla2g4a, Prkar2a, Rnf128, Spp1, Syt4                                                                                                                                                                                                                                                                                            |
| GO:0030425                | dendrite                        | 12h, 24h                    | 11                                           | Cald1, Cybb, Epha4, Gria3, Grm1, Kcnma1, Lrrk2, Pcdh8, Scn8a (ENSMUSG00000023033), Synpo, Wfs1                                                                                                                                                                                                                                                                                      |
| GO:0030659                | cytoplasmic vesicle membrane    | 12h, 24h                    | 10                                           | Cadps2, Caly, Cd9, Clic4, Gria3, Lamp2, Msn, Syt4, Tlr1, Zdhhc17                                                                                                                                                                                                                                                                                                                    |

|            |                                            |          |    |                                                                                                                                                                                                                             |
|------------|--------------------------------------------|----------|----|-----------------------------------------------------------------------------------------------------------------------------------------------------------------------------------------------------------------------------|
| GO:0030424 | axon                                       | 12h, 24h | 8  | Calca, Epha4, Grm1, Lrrk2, Lrrtm1, Scn2a1, Synpo, Vim                                                                                                                                                                       |
| GO:0016324 | apical plasma membrane                     | 12h, 24h | 8  | Amotl1, Atp8b1, Cd44, Cd9, Hspa1b, Kcnma1, Msn, Shroom3                                                                                                                                                                     |
| GO:0044309 | neuron spine                               | 12h, 24h | 6  | Akap5, Cald1, Dnm3, Gria3, Grm1, Synpo                                                                                                                                                                                      |
| GO:0060205 | cytoplasmic membrane-bounded vesicle lumen | 12h, 24h | 5  | Pros1, Serpine1, Srgn, Thbs1, Timp1                                                                                                                                                                                         |
| GO:0005901 | caveola                                    | 12h, 24h | 4  | Efna5, Efna5 (ENSMUSG00000090425), Kcnma1, Kif18a                                                                                                                                                                           |
| GO:0031527 | filopodium membrane                        | 12h, 24h | 3  | Akap5, Arf6, Msn                                                                                                                                                                                                            |
| GO:0001518 | voltage-gated sodium channel complex       | 12h, 24h | 3  | Scn2a1, Scn3b, Scn8a (ENSMUSG00000023033)                                                                                                                                                                                   |
| GO:0030315 | T-tubule                                   | 12h, 24h | 3  | Capn3, Prkar2a, Scn2a1                                                                                                                                                                                                      |
| GO:0033268 | node of Ranvier                            | 12h, 24h | 2  | Scn2a1, Scn8a (ENSMUSG00000023033)                                                                                                                                                                                          |
| GO:0005856 | cytoskeleton                               | 24h      | 31 | Arpc1b, Cald1, Casp8, Clic4, Ctnna1, Dnm3, Dock2, Fblim1, Fcgr2b, Fgfr1op, Fhod3, Frmd6, Hspb1, Kif18a, Micall1, Msn, Nedd1, Nedd9, Nek6, Nmt1, Nufip1, Parp3, Pcd6ip, Rai14, Sept6, Shroom3, Svil, Synpo, Tubb6, Vim, Yes1 |
| GO:0005815 | microtubule organizing center              | 24h      | 14 | Casp8, Clic4, Fgfr1op, Il1rn, Kif18a, Naf1, Nedd1, Nek6, Parp3, Pcd6ip, Prkar2a, Rfwd2, Yes1, Zfp110                                                                                                                        |
| GO:0009897 | external side of plasma membrane           | 24h      | 8  | Cd44, Cd9, Eng, Fcgr2b, Icam1, Itgav, Kcnma1, Thbs1                                                                                                                                                                         |
| GO:0005925 | focal adhesion                             | 24h      | 7  | Cald1, Fblim1, Msn, Nedd9, Rfwd2, Sdc1, Stard8                                                                                                                                                                              |
| GO:0016323 | basolateral plasma membrane                | 24h      | 6  | Akap5, Cd44, Erbb2ip, Hspa1b, Lin7b, Msn                                                                                                                                                                                    |
| GO:0019897 | extrinsic to plasma membrane               | 24h      | 5  | Anxa2, Ctnna1, Gng2, Gng4, S100a10                                                                                                                                                                                          |
| GO:0016363 | nuclear matrix                             | 24h      | 4  | Clic4, Nufip1, Sfpq, Vim                                                                                                                                                                                                    |
| GO:0009898 | internal side of plasma membrane           | 24h      | 3  | Gem, Msn, Rgs2                                                                                                                                                                                                              |

|            |                                         |              |    |                                                                                                                                                                                                                                                                                                                                                                                                                                                                                                                                                                                                                                                                                                                              |
|------------|-----------------------------------------|--------------|----|------------------------------------------------------------------------------------------------------------------------------------------------------------------------------------------------------------------------------------------------------------------------------------------------------------------------------------------------------------------------------------------------------------------------------------------------------------------------------------------------------------------------------------------------------------------------------------------------------------------------------------------------------------------------------------------------------------------------------|
| GO:0005634 | nucleus                                 | 6h, 12h, 24h | 99 | Adam12, Aff1, Agtpbbp1, Ahnak, Arid5b, Baz1a, Bcl11b, Birc3, Calca, Capn2, Capn3, Casp8, Cblb, Cd44, Cdk14, Cdkn1a, Cdyl, Clic4, Cstb, Dclk3, Ddx39, Dock2, Dyrk3, Eaf1, Ebna1bp2, Eif2ak2, Eif4ebp1, Elk3, Ell2, Eng, Erbb2ip, Etv3, Fam120b, Fgfr1op, Fhod3, Fos, Fosl2, Gadd45b, Gadd45g, Gcc2, Grm1, H3f3b, Hivep3, Hmgn1, Hn1l, Hspa1b, Hspb1, Hspb3, Hsph1, Id2, Ifrd1, Igfbp3, Il1rn, Kif18a, Klf4, Lgals1, Maff, Mbd2, Mcl1, Med13, Msn, Mybbp1a, Naf1, Nedd9, Nek6, Neurod6, Nfkbia, Nicn1, Nmi, Npas4, Nufip1, Parp3, Pla2g4a, Pvr, Rars, Rdh10, Rfwd2, Rgs2, Rpl12, Rps27l, Rps6ka5, Sap30, Sfpq, Sin3b, Snord22, Snrpa1, Svil, Tgif1, Trdmt1, Trib1, Tub, Utp14b, Vim, Wwtr1, Yy2, Zfp110, Zfp536, Zfp593, Zmiz1 |
| GO:0016023 | cytoplasmic membrane-bounded vesicle    | 6h, 12h, 24h | 23 | Anxa2, Bgn, Cadps2, Crisp1d2, Ctnna1, Cybb, Dnm3, Gcg, Gpnmb, Itgav, Lrrk2, Lyz2, Mall, Pcsk2, Pdc6ip, Pla2g4a, Scg2, Scn8a (ENSMUSG00000023033), Sept6, Srgn, Syt4, Thbs1, Tlr1                                                                                                                                                                                                                                                                                                                                                                                                                                                                                                                                             |
| GO:0034703 | cation channel complex                  | 6h, 12h, 24h | 9  | Fkbp1b, Kcnma1, Kcnq3, Kcnq5, Kcnt2, Kctd4, Scn2a1, Scn3b, Scn8a (ENSMUSG00000023033)                                                                                                                                                                                                                                                                                                                                                                                                                                                                                                                                                                                                                                        |
| GO:0008076 | voltage-gated potassium channel complex | 6h, 12h, 24h | 5  | Kcnma1, Kcnq3, Kcnq5, Kcnt2, Kctd4                                                                                                                                                                                                                                                                                                                                                                                                                                                                                                                                                                                                                                                                                           |

---
