# Supplementary material for: Glial responses during epileptogenesis in Mus musculus point to potential therapeutic targets
Source: PubMed Central journal article supplement (PMC6095496; doi:10.1371/journal.pone.0201742), 2018-08-16
Supplement: pone.0201742.s017.pdf [file pone.0201742.s017.pdf]

**Table S13:** Significantly changed GO Molecular Functions (level 6) at 24 hours post KA treatment, using the "Mapping to ontologies (TRANSPATH®)" workflow. All significantly changed genes at 24h were considered, and a threshold of p-value <0.05 was applied.

| Gene Ontology Category ID | GO-Molecular Function (level 6)           | Time point(s) of enrichment | Number of significantly changed genes at 24h | Symbol of significantly changed genes at 24h                                                                                                                                                                                                                                         |
|---------------------------|-------------------------------------------|-----------------------------|----------------------------------------------|--------------------------------------------------------------------------------------------------------------------------------------------------------------------------------------------------------------------------------------------------------------------------------------|
| GO:0032555                | purine ribonucleotide binding             | 12h, 24h                    | 37                                           | Arf6, Atp8b1, Cdk14, Dcl1, Dcl3, Ddx39, Dnm3, Dock2, Dyrk3, Eif2ak2, Epha3, Epha4, Eprs, Gem, Gucy1b3, Hspa1b, Hsph1, Irgm1, Kcnt2, Kif18a, Lrrk2, Nek6, Pak3, Papss2, Prkar2a, Rars, Riok2, Rnd3, Rps6ka5, Scn8a (ENSMUSG00000023033), Sept6, Srxn1, Tgm2, Trib1, Tubb6, Uck2, Yes1 |
| GO:0005509                | calcium ion binding                       | 12h, 24h                    | 26                                           | Acan, Anxa2, Capn2, Capn3, Cblb, Cdh4, Cdh8, Cgref1, Edem1, Egfl6, Fstl5, Hpca, Ltbp1, Pcdh11x, Pcdh19,                                                                                                                                                                              |
| GO:0004672                | protein kinase activity                   | 12h, 24h                    | 18                                           | Cdk14, Cdkn1a, Dcl1, Dcl3, Dyrk3, Eif2ak2, Eng, Epha3, Epha4, Lrrk2, Ltbp1, Nek6, Pak3, Riok2, Rps6ka5, Tbrg4, Trib1, Yes1                                                                                                                                                           |
| GO:0008324                | cation transmembrane transporter activity | 12h, 24h                    | 16                                           | Agtppb1, Fkbp1b, Kcnab1, Kcnma1, Kcnq3, Kcnq5, Kcnt2, Kctd4, Mmgt2, Scn2a1, Scn3b, Scn8a (ENSMUSG00000023033), Slc10a6, Slc6a8, Slc7a1, Zdhhc17                                                                                                                                      |
| GO:0022836                | gated channel activity                    | 6h, 12h, 24h                | 13                                           | Clic4, Cybb, Fkbp1b, Gria3, Kcnab1, Kcnma1, Kcnq3, Kcnq5, Kcnt2, Kctd4, Scn2a1, Scn3b, Scn8a (ENSMUSG00000023033)                                                                                                                                                                    |
| GO:0019901                | protein kinase binding                    | 12h, 24h                    | 13                                           | Akap5, Cblb, Cd44, Fgfr1op, Hspb1, Itgav, Msn, Nek6, Plek, Prkar2a, Tgif1, Trib1, Vim                                                                                                                                                                                                |
| GO:0005216                | ion channel activity                      | 12h, 24h                    | 13                                           | Clic4, Cybb, Fkbp1b, Gria3, Kcnab1, Kcnma1, Kcnq3, Kcnq5, Kcnt2, Kctd4, Scn2a1, Scn3b, Scn8a (ENSMUSG00000023033)                                                                                                                                                                    |
| GO:0019001                | guanyl nucleotide binding                 | 12h, 24h                    | 11                                           | Arf6, Dnm3, Dock2, Gem, Gucy1b3, Irgm1, Lrrk2, Rnd3, Sept6, Tgm2, Tubb6                                                                                                                                                                                                              |

|            |                                                                 |              |   |                                                      |
|------------|-----------------------------------------------------------------|--------------|---|------------------------------------------------------|
| GO:0008201 | heparin binding                                                 | 6h, 12h, 24h | 7 | Col25a1, Crisp1d2, Cyr61, Gpnmb, Hbegf, Thbs1, Thbs4 |
| GO:0008234 | cysteine-type peptidase activity                                | 24h          | 6 | Capn2, Capn3, Casp8, Ctla2a, Ctla2b, Ctsc            |
| GO:0031625 | ubiquitin protein ligase binding                                | 12h, 24h     | 5 | Hspa1b, Nfkb1a, Prkar2a, Trib1, Wfs1                 |
| GO:0031420 | alkali metal ion binding                                        | 12h, 24h     | 3 | Capn3, Scn2a1, Scn8a (ENSMUSG00000023033)            |
| GO:0005154 | epidermal growth factor receptor binding                        | 12h, 24h     | 3 | Cd44, Hbegf, Yes1                                    |
| GO:0005184 | neuropeptide hormone activity                                   | 12h, 24h     | 3 | Calca, Crh, Npy                                      |
| GO:0005534 | galactose binding                                               | 24h          | 2 | Eng, Lgals1                                          |
| GO:0031994 | insulin-like growth factor I binding                            | 24h          | 2 | Igfbp3, Itgav                                        |
| GO:0003796 | lysozyme activity                                               | 24h          | 2 | Lyz1, Lyz2                                           |
| GO:0004622 | lysophospholipase activity                                      | 24h          | 2 | Mgll, Pla2g4a                                        |
| GO:0005149 | interleukin-1 receptor binding                                  | 24h          | 2 | Il1rn, Myd88                                         |
| GO:0004033 | aldo-keto reductase (NADP) activity                             | 24h          | 2 | Akr1b8, Rdh10                                        |
| GO:0004675 | transmembrane receptor protein serine/threonine kinase activity | 24h          | 2 | Eng, Ltbp1                                           |
| GO:0005540 | hyaluronic acid binding                                         | 24h          | 2 | Acan, Cd44                                           |
| GO:0030291 | protein serine/threonine kinase inhibitor activity              | 24h          | 2 | Cdkn1a, Hspb1                                        |

---
