# Supplementary material for: Glial responses during epileptogenesis in Mus musculus point to potential therapeutic targets
Source: PubMed Central journal article supplement (PMC6095496; doi:10.1371/journal.pone.0201742), 2018-08-16
Supplement: pone.0201742.s018.pdf [file pone.0201742.s018.pdf]

**Table S14.** Predicted statistically significant upstream regulators of the 24h gene expression changes. The analysis was performed using the "Master regulators in networks (TRANSPATH®)" workflow, for all the significantly changed transcripts at 24h, applying the thresholds FDR>0.05, Score>0.2 and Z-Score>1. The predicted upstream regulators were filtered to exclude those that did not present with statistically significant overexpression themselves at 12h or 24h. The number and symbol of their respective significantly overexpressed downstream gene targets at 24h is included. (n/c: not changed)

| Upstream regulator | Fold Change at 12h | Fold Change at 24h | Z-Score | Number of regulated genes reached from dataset | Regulated genes reached from dataset                                                                                                                                                                                                                                                           |
|--------------------|--------------------|--------------------|---------|------------------------------------------------|------------------------------------------------------------------------------------------------------------------------------------------------------------------------------------------------------------------------------------------------------------------------------------------------|
| <b>Birc3</b>       | 2.47               | 2.68               | 3.39    | 38                                             | Birc3, Capn2, Casp8, Ccl9, Cdkn1a, Cybb, Eif2ak2, Eif4ebp1, Elk3, Fcgr2b, Fos, Gfap, H3f3b, Hbegf, Hmgn1, Hspb1, Icam1, Id2, Il1rn, Itgav, Klf4, Lif, Msn, Mybbp1a, Myd88, Nedd9, Nfkbia, Pdcd6ip, Pla2g4a, Ptpn12, Rai14, Rnd3, S100a10, Tnc, Tubb6, Vim, Wwtr1, Yes1                         |
| <b>Calca</b>       | n/c                | 5.55               | 8.26    | 38                                             | Birc3, Capn2, Casp8, Ccl9, Cdkn1a, Cybb, Eif2ak2, Eif4ebp1, Elk3, Fcgr2b, Fos, Gfap, H3f3b, Hbegf, Hmgn1, Hspb1, Icam1, Id2, Il1rn, Itgav, Klf4, Lif, Msn, Mybbp1a, Myd88, Nedd9, Nfkbia, Pdcd6ip, Pla2g4a, Ptpn12, Rai14, Rnd3, S100a10, Tnc, Tubb6, Vim, Wwtr1, Yes1                         |
| <b>Capn2</b>       | n/c                | 2.06               | 2.12    | 37                                             | Arf6, Arpp21, Bag2, Birc3, C3ar1, Capn2, Casp8, Ccl9, Cdkn1a, Eif2ak2, Eif4ebp1, Elk3, Fcgr2b, Fos, Gem, Gfap, H3f3b, Hmgn1, Hspb1, Icam1, Il1rn, Klf4, Msn, Mybbp1a, Nedd9, Nfkbia, Pdcd6ip, Pla2g4a, Ptpn12, Rai14, Rnd3, Timp1, Tnc, Tubb6, Vim, Wwtr1, Yes1                                |
| <b>Cd9</b>         | n/c                | 2.30               | 6.38    | 11                                             | Capn2, Cd9, Eif4ebp1, Hbegf, Nedd9, Nfkbia, Pdcd6ip, Ptpn12, Sdc1, Tnc, Tubb6                                                                                                                                                                                                                  |
| <b>Cyba</b>        | 2.23               | n/c                | 1.81    | 42                                             | Bag2, Bgn, Birc3, C3ar1, Calca, Capn2, Casp8, Ccl9, Cdkn1a, Cybb, Eif2ak2, Eif4ebp1, Elk3, Eng, Fcgr2b, Fos, Fosl2, Gfap, H3f3a, H3f3b, Hmgn1, Hspb1, Icam1, Il1rn, Itgav, Klf4, Lif, Msn, Mybbp1a, Nedd9, Nfkbia, Pdcd6ip, Pla2g4a, Ptpn12, Rai14, Rnd3, Tgm2, Timp1, Tubb6, Vim, Wwtr1, Yes1 |
| <b>Cybb</b>        | 2.92               | 4.75               | 4.52    | 15                                             | Capn2, Cdkn1a, Cybb, Eif4ebp1, Elk3, Fos, H3f3b, Hmgn1, Klf4, Mybbp1a, Nedd9, Nfkbia, Pla2g4a, Ptpn12, Rai14                                                                                                                                                                                   |
| <b>Eif2ak2</b>     | n/c                | 2.90               | 3.99    | 32                                             | Bag2, Bgn, Capn2, Casp8, Ccl9, Cdkn1a, Eif2ak2, Eif4ebp1, Elk3, Fos, Gfap, H3f3b, Hmgn1, Hspb1, Icam1, Il1rn, Klf4, Lif, Msn, Mybbp1a, Nedd9, Nfkbia, Pdcd6ip, Pla2g4a, Ptpn12, Rai14, Rnd3, Timp1, Tubb6, Vim, Wwtr1, Yes1                                                                    |

|               |      |       |      |    |                                                                                                                                                                                                                                                                                             |
|---------------|------|-------|------|----|---------------------------------------------------------------------------------------------------------------------------------------------------------------------------------------------------------------------------------------------------------------------------------------------|
| <b>Gcg</b>    | n/c  | 13.22 | 6.31 | 15 | Capn2, Cdkn1a, Eif4ebp1, Elk3, Fos, Gcg, H3f3b, Hmgn1, Klf4, Mybbp1a, Nedd9, Nfkb1a, Pla2g4a, Ptpn12, Rai14                                                                                                                                                                                 |
| <b>Hmgn1</b>  | n/c  | 2.08  | 5.17 | 15 | Bag2, Casp8, Cdkn1a, Eif2ak2, Eif4ebp1, Elk3, H3f3b, Hmgn1, Hspb1, Nedd9, Nfkb1a, Pla2g4a, Ptpn12, Vim, Yes1                                                                                                                                                                                |
| <b>Icam1</b>  | 4.10 | 4.32  | 4.56 | 36 | Arf6, Bag2, C3ar1, Capn2, Ccl9, Cdkn1a, Cyr61, Eif4ebp1, Elk3, Eng, Fcgr2b, Fos, Gfap, H3f3b, Hmgn1, Hspb1, Icam1, Il1rn, Klf4, Msn, Mybbp1a, Myd88, Nedd9, Nfkb1a, Pdc6ip, Pla2g4a, Ptpn12, Rai14, Rnd3, Spp1, Timp1, Tnc, Tubb6, Vim, Wwtr1, Yes1                                         |
| <b>Il11</b>   | 2.31 | 1.24  | 5.06 | 17 | Birc3, Capn2, Cybb, Eif4ebp1, Elk3, Fos, Icam1, Il11, Mybbp1a, Nedd9, Nfkb1a, Pdc6ip, Pla2g4a, Ptpn12, Rai14, Tubb6, Yes1                                                                                                                                                                   |
| <b>Itgav</b>  | n/c  | 3.30  | 5.97 | 34 | Bag2, C3ar1, Capn2, Casp8, Ccl9, Cdkn1a, Cyr61, Eif4ebp1, Elk3, Eng, Fcgr2b, Fos, H3f3b, Hmgn1, Hspb1, Icam1, Itgav, Klf4, Msn, Mybbp1a, Nedd9, Nfkb1a, Pdc6ip, Pla2g4a, Ptpn12, Rai14, Rnd3, Spp1, Tgm2, Tnc, Tubb6, Vim, Wwtr1, Yes1                                                      |
| <b>Lgals1</b> | n/c  | 2.73  | 6.58 | 20 | Capn2, Cdkn1a, Eif4ebp1, Elk3, Fcgr2b, Fos, Gfap, H3f3b, Hmgn1, Klf4, Lgals1, Mybbp1a, Nedd9, Nfkb1a, Pdc6ip, Pla2g4a, Ptpn12, Rai14, Vim, Yes1                                                                                                                                             |
| <b>Lif</b>    | n/c  | 6.95  | 4.83 | 40 | Bag2, Birc3, C3ar1, Capn2, Casp8, Ccl9, Cdkn1a, Cybb, Eif2ak2, Eif4ebp1, Elk3, Eng, Fcgr2b, Fos, Gfap, H3f3b, Hmgn1, Hspb1, Icam1, Il1rn, Itgav, Klf4, Lif, Msn, Mybbp1a, Nedd9, Nfkb1a, Npy, Pak3, Pdc6ip, Pla2g4a, Ptpn12, Rai14, Rnd3, Timp1, Tnc, Tubb6, Vim, Wwtr1, Yes1               |
| <b>Myd88</b>  | n/c  | 2.07  | 2.49 | 40 | Bag2, Bgn, Birc3, Capn2, Casp8, Ccl9, Cdkn1a, Crh, Cybb, Eif2ak2, Eif4ebp1, Elk3, Fcgr2b, Fos, Gfap, H3f3b, Hmgn1, Hspb1, Icam1, Il1rn, Itgav, Klf4, Msn, Msr1, Mybbp1a, Myd88, Nedd9, Nfkb1a, Nmi, Pdc6ip, Pla2g4a, Ptpn12, Rai14, Rnd3, Tgm2, Timp1, Tubb6, Vim, Wwtr1, Yes1              |
| <b>Nedd9</b>  | 4.16 | 4.70  | 3.83 | 41 | Arf6, Arpp21, Birc3, C3ar1, Capn2, Casp8, Ccl9, Cdkn1a, Cybb, Eif2ak2, Eif4ebp1, Elk3, Eng, Fcgr2b, Fos, Gfap, H3f3b, Hbegf, Hmgn1, Hspb1, Icam1, Il1rn, Itgav, Klf4, Msn, Mybbp1a, Nedd9, Nfkb1a, Pdc6ip, Pla2g4a, Plek, Ptpn12, Rai14, Rnd3, S100a10, Timp1, Tnc, Tubb6, Vim, Wwtr1, Yes1 |

|               |      |      |      |    |                                                                                                                                                                                                                                                                                           |
|---------------|------|------|------|----|-------------------------------------------------------------------------------------------------------------------------------------------------------------------------------------------------------------------------------------------------------------------------------------------|
| <b>Nek6</b>   | n/c  | 2.17 | 4.01 | 38 | Arpp21, Bag2, Bgn, C3ar1, Capn2, Casp8, Ccl9, Cdkn1a, Crh, Cybb, Eif2ak2, Eif4ebp1, Elk3, Fcgr2b, Fos, H3f3b, Hmgn1, Hspb1, Icam1, Il1rn, Itgav, Klf4, Msn, Mybbp1a, Nedd9, Nek6, Nfkbia, Odc1, Pcd6ip, Pla2g4a, Ptpn12, Rai14, Tgm2, Timp1, Tubb6, Vim, Wwtr1, Yes1                      |
| <b>Nfkbia</b> | 2.06 | 2.16 | 5.33 |    | Ccl9, Cdkn1a, Cybb, Eif4ebp1, Elk3, Fos, H3f3b, Hmgn1, Hspb1, Icam1, Klf4, Mybbp1a, Nfkbia, Ptpn12, Rai14, Vim, Wwtr1                                                                                                                                                                     |
| <b>Pak3</b>   | n/c  | 2.37 | 3.51 | 40 | Bag2, Bgn, Birc3, C3ar1, Calca, Capn2, Casp8, Cdkn1a, Eif2ak2, Eif4ebp1, Elk3, Erbb2ip, Fos, Fosl2, Gfap, H3f3b, Hmgn1, Hspb1, Icam1, Il1rn, Itgav, Klf4, Lif, Msn, Mybbp1a, Nedd9, Nfkbia, Odc1, Pak3, Pcd6ip, Pla2g4a, Ptpn12, Rai14, Rnd3, Tgm2, Timp1, Tubb6, Vim, Wwtr1, Yes1        |
| <b>Rfwd2</b>  | n/c  | 2.63 | 2.73 | 35 | Bag2, Birc3, Calca, Capn2, Casp8, Cdkn1a, Cybb, Eif2ak2, Eif4ebp1, Elk3, Eng, Fos, Fosl2, Gfap, H3f3b, Hmgn1, Hspb1, Icam1, Itgav, Klf4, Msn, Mybbp1a, Nedd9, Nfkbia, Pcd6ip, Pla2g4a, Ptpn12, Rai14, Rfwd2, Rnd3, Timp1, Tnc, Tubb6, Vim, Yes1                                           |
| <b>Rnd3</b>   | 3.85 | 2.77 | 4.06 | 32 | Bag2, Bgn, Casp8, Ccl9, Cdkn1a, Eif4ebp1, Elk3, Erbb2ip, Fos, Gem, Gfap, H3f3b, Hmgn1, Hspb1, Icam1, Il13ra1, Il1rn, Itgav, Klf4, Msn, Mybbp1a, Nedd9, Nfkbia, Pcd6ip, Pla2g4a, Ptpn12, Rai14, Rnd3, Timp1, Tubb6, Vim, Wwtr1                                                             |
| <b>S1pr3</b>  | 4.81 | 4.69 | 7.31 | 17 | Cdkn1a, Edg3, Eif4ebp1, Elk3, Fos, Gfap, H3f3b, Hmgn1, Klf4, Msn, Mybbp1a, Nedd9, Nfkbia, Pla2g4a, Rai14, Rnd3, Vim                                                                                                                                                                       |
| <b>Spp1</b>   | 1.22 | 2.25 | 6.69 | 26 | Bag2, Calca, Capn2, Eif4ebp1, Elk3, Fos, H3f3b, Hmgn1, Hspb1, Icam1, Il1rn, Itgav, Klf4, Msn, Mybbp1a, Myd88, Nedd9, Nfkbia, Pla2g4a, Ptpn12, Rai14, Spp1, Tgm2, Timp1, Tubb6, Vim                                                                                                        |
| <b>Tgm2</b>   | 2.65 | 5.63 | 4.98 | 41 | Arf6, Bag2, Birc3, Capn2, Ccl9, Cdkn1a, Cyr61, Eif2ak2, Eif4ebp1, Elk3, Eng, Fcgr2b, Fos, Gfap, H3f3b, Hbegf, Hmgn1, Hspb1, Icam1, Itgav, Klf4, Ltbp1, Mybbp1a, Nedd9, Nfkbia, Odc1, Pcd6ip, Pla2g4a, Plek, Ptpn12, Rai14, S100a10, Sdc1, Spp1, Tgm2, Timp1, Tnc, Tubb6, Vim, Wwtr1, Yes1 |
| <b>Vim</b>    | 2.79 | 3.65 | 5.47 | 15 | Capn2, Cdkn1a, Eif4ebp1, Elk3, Fos, H3f3b, Hmgn1, Klf4, Mybbp1a, Nedd9, Nfkbia, Pla2g4a, Ptpn12, Rai14, Vim                                                                                                                                                                               |

|             |     |      |      |    |                                                                                                                                                                                                                                                                                               |
|-------------|-----|------|------|----|-----------------------------------------------------------------------------------------------------------------------------------------------------------------------------------------------------------------------------------------------------------------------------------------------|
| <b>Yes1</b> | n/c | 2.13 | 3.82 | 41 | Arf6, Arpp21, Birc3, C3ar1, Calca, Capn2, Casp8, Ccl9, Cdkn1a, Cybb, Eif2ak2, Eif4ebp1, Elk3, Eng, Fcgr2b, Fos, Gfap, H3f3b, Hbegf, Hmgn1, Hspb1, Icam1, Il1rn, Itgav, Klf4, Msn, Mybbp1a, Nedd9, Nfkbia, Pdcd6ip, Pla2g4a, Ptpn12, Rai14, Rnd3, S100a10, Timp1, Tnc, Tubb6, Vim, Wwtr1, Yes1 |
|-------------|-----|------|------|----|-----------------------------------------------------------------------------------------------------------------------------------------------------------------------------------------------------------------------------------------------------------------------------------------------|

---
