# Supplementary material for: Glial responses during epileptogenesis in Mus musculus point to potential therapeutic targets
Source: PubMed Central journal article supplement (PMC6095496; doi:10.1371/journal.pone.0201742), 2018-08-16
Supplement: pone.0201742.s019.pdf [file pone.0201742.s019.pdf]

**Table S15:** Experimentally validated mRNA-microRNA interactions for the underexpressed genes at 24h, according to miRWalk search tool. The microRNAs are sorted by descending number of target genes in the dataset.

| microRNA     | Number of target genes | Target genes                                                           |
|--------------|------------------------|------------------------------------------------------------------------|
| mmu-miR-466  | 10                     | Akap5, Ccdc85a, Dnm3, Egfl6, Epha4, Gria3, Hpca, Neurod6, Scn2a1, Wfs1 |
| mmu-miR-297  | 8                      | Cpne9, Dnm3, Egfl6, Kcnab1, Rasgrp1, Scn2a1, Scn8a, Serpini1           |
| mmu-let-7b   | 6                      | Dnm3, Epha4, Gria3, Scn8a, Tbc1d14, Tub                                |
| mmu-miR-17   | 6                      | Mgll, Scn2a1, Scn3b, Scn8a, St6galnac5, Wfs1                           |
| mmu-miR-223  | 6                      | Cblb, Dnm3, Gcc2, Gria3, Scn8a, Tbc1d14                                |
| mmu-miR-301b | 6                      | Cblb, Fkbp1b, Fstl5, Hpca, Mgll, Scn3b                                 |
| mmu-miR-15   | 5                      | 3632451O06Rik, Bcl11b, Mgll, Scn2a1, Scn8a                             |
| mmu-miR-181a | 5                      | Epha4, Gria3, Sept6, Tub, Zdhhc17                                      |
| mmu-miR-19b  | 5                      | Cblb, Fkbp1b, Hpca, Rasgrp1, Tub                                       |
| mmu-miR-9    | 5                      | Gucy1b3, Rasgrp1, Scn3b, Scn8a, Serpini1                               |
| mmu-miR-129  | 4                      | Bcl11b, Kcnma1, Mgll, Scn8a                                            |
| mmu-miR-149  | 4                      | Epha4, Fkbp1b, Gria3, Scn8a                                            |
| mmu-miR-24   | 4                      | Fkbp1b, Gria3, Ndr3, Scn2a1                                            |
| mmu-miR-26a  | 4                      | Fkbp1b, Gpam, Lrrtm1, Scn2a1                                           |
| mmu-miR-30e  | 4                      | Epha4, Rps6ka5, Scn2a1, Scn8a                                          |
| mmu-miR-425  | 4                      | Fkbp1b, Scn3b, Scn8a, Serpini1                                         |
| mmu-miR-669  | 4                      | Dnm3, Gng2, Gria3, Scn2a1                                              |
| mmu-miR-1187 | 3                      | Ccdc85a, Egfl6, Scn2a1                                                 |
| mmu-miR-124  | 3                      | 3632451O06Rik, Lrrn2, Sept6                                            |
| mmu-miR-128  | 3                      | Hpca, Neurod6, Wfs1                                                    |
| mmu-miR-27   | 3                      | Cblb, Epha4, Neurod6                                                   |
| mmu-miR-3087 | 3                      | Ccdc85a, Gng2, Rasgrp1                                                 |
| mmu-miR-324  | 3                      | Dkk3, Gpam, Scn3b                                                      |
| mmu-miR-329  | 3                      | Akap5, Epha4, Wfs1                                                     |
| mmu-miR-34b  | 3                      | Rasgrp1, Scn2a1, Zdhhc17                                               |
| mmu-miR-362  | 3                      | Akap5, Epha4, Wfs1                                                     |
| mmu-miR-1195 | 2                      | Akap5, Gng2                                                            |
| mmu-miR-1198 | 2                      | Ccdc85a, Egfl6                                                         |
| mmu-miR-139  | 2                      | Akap5, Gng2                                                            |
| mmu-miR-1894 | 2                      | Akap5, Cblb                                                            |
| mmu-miR-1912 | 2                      | Gng2, Htr1a                                                            |
| mmu-miR-3089 | 2                      | Akap5, Gng2                                                            |
| mmu-miR-467  | 2                      | Dnm3, Scn2a1                                                           |
| mmu-miR-511  | 2                      | Ccdc85a, Egfl6                                                         |
| mmu-miR-5135 | 2                      | Akap5, Gng2                                                            |
| mmu-miR-541  | 2                      | Kcnma1, Scn2a1                                                         |
| mmu-miR-665  | 2                      | Akap5, Gng2                                                            |
| mmu-miR-673  | 2                      | Cblb, Epha4                                                            |
| mmu-miR-693  | 2                      | Cpne9, Gng2                                                            |
| mmu-miR-694  | 2                      | Epha4, Gng2                                                            |
| mmu-miR-804  | 2                      | Akap5, Cpne9                                                           |
