# Supplementary material for: Glial responses during epileptogenesis in Mus musculus point to potential therapeutic targets
Source: PubMed Central journal article supplement (PMC6095496; doi:10.1371/journal.pone.0201742), 2018-08-16
Supplement: pone.0201742.s020.pdf [file pone.0201742.s020.pdf]

**Table S16:** Experimentally validated mRNA-microRNA interactions for the overexpressed genes at 24h, according to miRWalk search tool. The microRNAs are sorted by descending number of target genes in the dataset.

| miRNA        | Number of target genes | Gene Symbols                                                                                                                                                   |
|--------------|------------------------|----------------------------------------------------------------------------------------------------------------------------------------------------------------|
| mmu-miR-466  | 22                     | Adamts9, Atp8b1, Casp8, Eil2, Etv3, Fblim1, Fosl2, Hivep3, Id2, Igfbp3, Maff, Msr1, Nfkbia, Osgin2, Rwdd4a, Scg2, Shroom3, Slc6a8, Slc7a1, Srxn1, Stard8, Tll1 |
| mmu-miR-340  | 16                     | Aff1, Dyrk3, Edem1, Fhod3, Grem2, Hbegf, Id2, Igfbp3, Mbd2, Mcl1, Med13, Slc25a24, Slc7a1, Spp1, Tgif1, Yes1                                                   |
| mmu-miR-669  | 16                     | Adamts9, Atp8b1, C3ar1, Cdh4, Chml1, Efn5, Eil2, Etv3, Hivep3, Hspa1b, Id2, Mcl1, Nfkbia, Slc6a8, Stard8, Tll1                                                 |
| mmu-miR-124  | 14                     | Amotl1, Arpc1b, Dcl1, Ebna1bp2, Icam1, Litaf, Myd88, Palld, Ptpn12, Rai14, S100a10, Spp1, Svil, Zfp536                                                         |
| mmu-miR-297  | 12                     | Adam12, Atp8b1, Capn2, Casp8, Elk3, Eil2, Etv3, Fblim1, Nfkbia, Stard8, Uck2, Wwtr1                                                                            |
| mmu-miR-362  | 11                     | Adamts9, Amotl1, Fosl2, Hivep3, Id2, Msr1, Pcdh8, Rwdd4a, Scg2, Slc6a8, Tll1                                                                                   |
| mmu-miR-9    | 11                     | Adamts9, Antxr2, Arpc1b, Arpp21, Eaf1, Gfap, Gramd1b, Pcdh8, Prkar2a, Rnf128, Zfp275                                                                           |
| mmu-miR-19b  | 10                     | Gramd1b, Igfbp3, Pak3, Papss2, Pros1, Rassf8, Rnf128, Slc6a8, Tgif1, Zfp275                                                                                    |
| mmu-miR-15a  | 9                      | Dcl1, Etv3, Grem2, Igfbp3, Itgav, Prkar2a, Smyd4, Tulp4, Zfp275                                                                                                |
| mmu-miR-129  | 9                      | Casp8, Cdh4, Cybb, Efn5, Il11, Med13, Parp3, Smyd4, Zfp568                                                                                                     |
| mmu-miR-329  | 9                      | Adamts9, Amotl1, Fosl2, Hivep3, Msr1, Rwdd4a, Scg2, Slc6a8, Tll1                                                                                               |
| mmu-miR-467  | 9                      | Adamts9, Atp8b1, Casp8, Eil2, Hivep3, Id2, Msr1, Nfkbia, Stard8                                                                                                |
| mmu-miR-7b   | 9                      | Ahnak, Arpp21, Bag3, Dcl1, Fgfr1op, Fos, Gramd1b, Mbd2, Ptgfrn                                                                                                 |
| mmu-miR-181a | 8                      | Adamts9, Cald1, Dcl1, Eif2ak2, Id2, Mcl1, Spp1, Zfp568                                                                                                         |
| mmu-miR-149  | 8                      | Edem1, Efn5, Gramd1b, Ptgfrn, Ptpn12, Slc6a8, Slc7a1, Wwtr1                                                                                                    |
| mmu-miR-30   | 8                      | Arid5b, Mcl1, Osmr, Ppfbp1, Ptgfrn, Sap30, Serpine1, Slc7a1                                                                                                    |
| mmu-miR-223  | 7                      | Antxr2, Inpp5f, Mt2, Rgs2, Syt4, Ubfd1, Vim                                                                                                                    |
| mmu-miR-301b | 7                      | Cald1, Grem2, Papss2, Pros1, Pvr, Rnf128, Zfp275                                                                                                               |
| mmu-miR-34b  | 7                      | Cald1, Dcl1, Edem1, Igfbp3, Pcdh8, Rnf128, Syt4                                                                                                                |
| mmu-miR-17   | 6                      | Cald1, Capn2, Gng4, Mcl1, Pvr, Timp1                                                                                                                           |
| mmu-miR-1a   | 5                      | Casp8, Ctla2a, Frmd6, Hspa1b, Klf4                                                                                                                             |
| mmu-let-7b   | 5                      | Arpp21, Cald1, Gramd1b, Slc6a8, Thbs1                                                                                                                          |
| mmu-miR-324  | 5                      | Arpp21, Etv3, Gfap, Wwtr1, Zmiz1                                                                                                                               |

|                |   |                                  |
|----------------|---|----------------------------------|
| mmu-miR-344    | 5 | Etv3, Id2, Igfbp3, Mcl1, Wwtr1   |
| mmu-miR-425    | 5 | Cald1, Grem2, Mcl1, Prkar2a, Tnc |
| mmu-miR-205    | 4 | Efna5, Eif2ak2, Fgl2, Lrrk2      |
| mmu-miR-10     | 4 | Ccl9, Cdkn1a, Klf4, Plek         |
| mmu-miR-3470   | 4 | Il11, Serpine1, Smyd4, Srgn      |
| mmu-miR-410    | 4 | Etv3, Id2, Igfbp3, Wwtr1         |
| mmu-miR-5101   | 4 | Cdh4, Efna5, Med13, Slc7a1       |
| mmu-miR-541    | 4 | Arpp21, Efna5, Sh2d5, Zmiz1      |
| mmu-miR-1896   | 3 | Casp8, Il11, Smyd4               |
| mmu-miR-125b-2 | 3 | Antxr2, Il1rn, Serpine1          |
| mmu-miR-1198   | 3 | Casp8, Eil2, Fblim1              |
| mmu-miR-1192   | 3 | Ccl9, Chml, Plek                 |
| mmu-miR-1187   | 3 | Casp8, Eil2, Fblim1              |
| mmu-miR-26a    | 3 | Eaf1, Slc7a1, Wwtr1              |
| mmu-miR-24     | 3 | Hbegf, Slc7a1, Srxn1             |
| mmu-miR-224    | 3 | Npas4, Ptx3, Serpine1            |
| mmu-miR-27     | 3 | Ccl9, Odc1, Spp1                 |
| mmu-miR-3064   | 3 | Ebna1bp2, Il11, Smyd4            |
| mmu-miR-302    | 3 | Cdh4, Cdkn1a, Zfp568             |
| mmu-miR-3089   | 3 | Chml, Ebna1bp2, Srxn1            |
| mmu-miR-3108   | 3 | Ctla2a, Eif2ak2, Zfp568          |
| mmu-miR-345    | 3 | Atp8b1, Eaf1, Zmiz1              |
| mmu-miR-335    | 3 | Med13, Smyd4, Zfp568             |
| mmu-miR-3473   | 3 | Ccl9, Edem1, Riok2               |
| mmu-miR-377    | 3 | Adamts9, Igfbp3, Spp1            |
| mmu-miR-450b   | 3 | Aff1, Cdh4, Ctla2a               |
| mmu-miR-511    | 3 | Casp8, Eil2, Fblim1              |
| mmu-miR-495    | 3 | Ccl9, Chml, Plek                 |
| mmu-miR-665    | 3 | Ccl9, Ebna1bp2, Srxn1            |
| mmu-miR-758    | 3 | Ptgrn, Syt4, Tnc                 |
| mmu-miR-204    | 2 | Efna5, Fgl2                      |
| mmu-miR-1953   | 2 | Hn1l, Zmiz1                      |
| mmu-miR-194    | 2 | Eif2ak2, Scg2                    |
| mmu-miR-1930   | 2 | Ctla2a, Ebna1bp2                 |
| mmu-miR-155    | 2 | Etv3, Fos                        |
| mmu-miR-150    | 2 | Myd88, Zfp568                    |
| mmu-miR-145a   | 2 | Klf4, Lamp2                      |
| mmu-miR-136    | 2 | Ctla2a, Prkar2a                  |
| mmu-miR-1251   | 2 | Ctla2a, Mcl1                     |
| mmu-miR-1195   | 2 | Ebna1bp2, Srxn1                  |
| mmu-miR-208b   | 2 | Frmd6, Mcl1                      |
| mmu-miR-212    | 2 | Cdh4, Ctla2a                     |
| mmu-miR-211    | 2 | Efna5, Fgl2                      |
| mmu-miR-294    | 2 | Cdkn1a, Zfp568                   |
| mmu-miR-291    | 2 | Cdkn1a, Zfp568                   |
| mmu-miR-295    | 2 | Cdkn1a, Zfp568                   |
| mmu-miR-3065   | 2 | Prkar2a, Spp1                    |

|              |   |                  |
|--------------|---|------------------|
| mmu-miR-296  | 2 | Ctla2a, Slc7a1   |
| mmu-miR-3087 | 2 | Il11, Smyd4      |
| mmu-miR-3085 | 2 | Il11, Smyd4      |
| mmu-miR-3095 | 2 | Casp8, Frmd6     |
| mmu-miR-320  | 2 | Fosl2, Serpine1  |
| mmu-miR-342  | 2 | Aff1, Igfbp3     |
| mmu-miR-339  | 2 | Ccl9, Plek       |
| mmu-miR-351  | 2 | Antxr2, Il1rn    |
| mmu-miR-448  | 2 | Lamp2, Tll1      |
| mmu-miR-5125 | 2 | Il11, Zfp568     |
| mmu-miR-590  | 2 | Efna5, Parp3     |
| mmu-miR-543  | 2 | Efna5, Scg2      |
| mmu-miR-5128 | 2 | Ctla2a, Eif2ak2  |
| mmu-miR-709  | 2 | Chml, Parp3      |
| mmu-miR-706  | 2 | Ccl9, Plek       |
| mmu-miR-692  | 2 | Clic4, Frs1      |
| mmu-miR-804  | 2 | Ebna1bp2, Srxn1  |
| mmu-miR-761  | 2 | Ccl9, Itgav      |
| mmu-miR-875  | 2 | Rwdd4a, Serpine1 |

---
