# Supplementary material for: Glial responses during epileptogenesis in Mus musculus point to potential therapeutic targets
Source: PubMed Central journal article supplement (PMC6095496; doi:10.1371/journal.pone.0201742), 2018-08-16
Supplement: pone.0201742.s021.pdf [file pone.0201742.s021.pdf]

**Table S17:** Primer sequences used for the evaluation of gene expression by qRT-PCR analysis.

| <b>Gene Symbol</b> | <b>Forward primer Sequence (5'-&gt;3')</b> | <b>Reverse primer Sequence (5'-&gt;3')</b> |
|--------------------|--------------------------------------------|--------------------------------------------|
| Bdnf               | CAAAAATTACCTGGATGCCG                       | ACTGCTTCAGTTGGCCTTTG                       |
| Casp8              | GTTGCCACCTTCAGTTTTGG                       | CCTTCATTTTTTCGGAGTTGG                      |
| Cav1               | GAAACCTCCTCAGAGCCTGC                       | GTGTGCGCGTCATACACTTG                       |
| Cybb               | AACCTTTGCTAACATGGGGAA                      | CCAGAGCCAGTGCTGACC                         |
| Fos                | CCTGAAGAGGAAGAGAAACGG                      | TGGGCTGCCAAAATAAACTCC                      |
| Gapdh              | CACGTGGAGATGGATGTG                         | CGGCGATAGTCGTTAGCT                         |
| Hspa1b             | CTTGGGCACCGATTACTGTC                       | CATAATCCCCTGGTACAGTGC                      |
| Il6                | TCTCCACGGTCTGTTCCGGGCG                     | AGGTCTGCCCTTTCTCCCCTTCTT                   |
| Nos3               | GGCAGCATCACCTACGACA                        | GAGCCACTCCTTTTGATGGA                       |
| Nrif/Zfp110        | GGCAGCACCCATCTTCTGT                        | AGACTCATGGGGCCAGGTT                        |
| Socs3              | GATTTGCTTCGGGACTAGG                        | GACGGGAATCAGGGATCTTC                       |
| Tnfrs1a            | CCGTGACAATCCCCTGTAAG                       | GATAACCAGGGGCAACAGC                        |
